# Supplementary material for: Identification and Temporal Expression Analysis of Conserved and Novel MicroRNAs in the Leaves of Winter Wheat Grown in the Field
Source: Front Genet. 2019 Sep 4;10:779. doi: 10.3389/fgene.2019.00779 (PMC6737308; doi:10.3389/fgene.2019.00779)
Supplement: Supplementary file 4 [file Table_4.xlsx]

## Sheet: Sheet1
Spplemental TABLE S4 expression of novel miRNA in wheat leaves
miRNA name	Leaf_1	Leaf_2	Leaf_3	Leaf_4
novel_miR30	15.3196	22.8729	14.1771	9.16164
novel_miR127	49.4562	53.8244	50.7506	34.5852
novel_miR128	114.971	133.782	94.3851	92.0745
novel_miR193	24.6296	17.5684	8.60553	9.94038
novel_miR259	6.50221	18.785	19.1418	16.2161
novel_miR364	1.87185	2.82262	4.74408	2.65688
novel_miR381	2.70925	3.79593	3.97178	1.96975
novel_miR390	101.178	143.077	246.913	220.246
novel_miR553	3.15259	5.06124	4.13728	0.961972
novel_miR639	2.65999	1.45997	0.6068	1.42005
novel_miR641	3.20184	3.45527	5.24055	2.38203
novel_miR652	1.77333	1.50864	2.70302	2.33622
novel_miR669	4.67962	6.42389	12.8531	3.344
novel_miR678	4.67962	11.4365	2.92367	7.2377
novel_miR692	0.59111	0.340661	0	6.45896
novel_miR810	25.1714	39.468	21.2932	59.2758
novel_miR866	14.0389	18.9797	11.1431	0.412274
novel_miR1009	3.89147	7.20254	3.6408	5.81764
novel_miR1154	13.2507	7.3972	18.7005	62.2075
novel_miR1255	11.1818	13.7724	10.2053	0
novel_miR1304	15.5659	16.7897	14.8942	6.87123
novel_miR1322	41.0329	43.9939	37.8423	0
novel_miR1372	9.95035	19.515	9.8743	7.69578
novel_miR1401	1.77333	4.08793	1.76524	1.23682
novel_miR1419	32.9544	33.2388	13.9012	4.94729
novel_miR1544	535.89	915.842	267.875	455.013
novel_miR1560	757.212	777.631	0	0
novel_miR1613	1.62555	2.96861	6.2335	1.46586
novel_miR1617	5.56628	4.91525	0	5.45118
novel_miR1686	88.8635	159.575	102.163	89.097
novel_miR1737	8.66961	13.4318	6.89546	19.0562
novel_miR1744	4.03925	5.8399	3.75113	0
novel_miR1875	17.9303	17.033	31.333	38.2957
novel_miR2079	49.2591	28.6642	8.38488	0
novel_miR2133	1.28074	2.53062	1.2136	1.05359
novel_miR2185	16.9944	0	13.6806	10.6733
novel_miR2191	6.10813	5.59657	9.15717	6.50476
novel_miR2567	0	12.0691	11.6395	0
novel_miR2745	0	198.216	0	0
novel_miR2917	0	5.49924	0	0
novel_miR3314	0	6.71588	0	0
novel_miR3417	0	0.243329	0.275818	2.7943
novel_miR3607	0	1.02198	0	13.8341
novel_miR3791	0	0	1.2136	12.6431
novel_miR4191	0	0	11.474	0
novel_miR4740	0	0	7.33677	0
novel_miR5134	0	0	0	5.72603
novel_miR5169	0	0	0	88.6389
novel_miR5172	0	0	0	4.80986
novel_miR5542	0	0	0	28.5843
novel_miR5552	0	0	0	2.97753
novel_miR5598	0	0	0	2.74849
novel_miR5756	0	0	0	10.1694
novel_miR5816	0	0	0	4.85567
novel_miR5831	0	0	0	2.56526
