# Supplementary material for: Identification and Temporal Expression Analysis of Conserved and Novel MicroRNAs in the Leaves of Winter Wheat Grown in the Field
Source: Front Genet. 2019 Sep 4;10:779. doi: 10.3389/fgene.2019.00779 (PMC6737308; doi:10.3389/fgene.2019.00779)
Supplement: Supplementary file 7 [file Table_7.xlsx]

## Sheet: known miRNAs
Supplemental Table S7. Predicted target genes of wheat known miRNAs
miRNA	Score	Targtet dene ID	target gene anotation
miR156a-5p	1.5	Traes_6AS_99C6A3B0B.2	protein brassinosteroid insensitive 1
	1	TRAES3BF084600040CFD_t1	protein brassinosteroid insensitive 1
	1.5	Traes_6DS_7B1596298.1	protein brassinosteroid insensitive 1
	1	Traes_5BL_96D5EA4EE.1	protein brassinosteroid insensitive 1
	1	Traes_7BS_1542EA53A.1	protein brassinosteroid insensitive 1
	1.5	Traes_2BS_186EA570A.1	protein brassinosteroid insensitive 1
	2.5	Traes_7DS_EF948225F.2	--
	1	Traes_5DL_1272B4BAC.1	protein brassinosteroid insensitive 1
	1.5	Traes_6BS_F50663DF7.1	protein brassinosteroid insensitive 1
	1.5	Traes_4BS_375EF1D15.1	--
	2.5	Traes_5BL_9A628DFEB.2	protease IV
	1	Traes_7AS_FE67F9E86.1	--
	1	Traes_7DS_DBB29C7CD.1	--
	1.5	Traes_6DS_C4D93239C.1	protein brassinosteroid insensitive 1
	1	Traes_6AS_32A35158A.1	protein brassinosteroid insensitive 1
	1	Traes_6BS_542961EA4.2	--
	1	Traes_5BL_96FDFC152.1	protein brassinosteroid insensitive 1
miR157d	2.5	Traes_7BL_504F16792.1	--
	2.5	Traes_3DS_763365F93.1	--
	2	TRAES3BF083000180CFD_t1	leucine-rich repeat protein
	2.5	TRAES3BF028200010CFD_t1	--
	2.5	Traes_6BL_30ACE5681.5	mTERF domain-containing protein, mitochondrial
	2.5	Traes_7DL_8F1B8F5BE.1	--
	2	Traes_5AL_2C0D0BFE0.1	calcium-dependent protein kinase
miR157d-3p	2.2	Traes_6DL_47E95082A.1	CLIP-associating protein 1/2
	1.8	Traes_6AL_11B9FC3DD.1	CLIP-associating protein 1/2
	1.8	Traes_6BL_47A9BB934.2	CLIP-associating protein 1/2
miR159a.1	1.8	Traes_3DL_D9A29948B.2	myb proto-oncogene protein, plant
	1.8	Traes_3AL_F09C7CA19.1	myb proto-oncogene protein, plant
	2	Traes_1DL_25540DE53.2	myb proto-oncogene protein, plant
	2	Traes_1BL_CF98E922B.1	myb proto-oncogene protein, plant
	2	Traes_2AL_0A21FB42C.1	myb proto-oncogene protein, plant
	2	Traes_3AS_D1D1A1994.1	--
	2	Traes_2BL_855A1170C.2	myb proto-oncogene protein, plant
	2.5	Traes_7AS_2831C6473.3	coatomer, subunit beta'
	2	Traes_2DL_912473A86.1	myb proto-oncogene protein, plant
	2.2	Traes_6AL_BF34EBCFA.2	zinc finger protein CONSTANS
	1.8	TRAES3BF027700010CFD_t1	myb proto-oncogene protein, plant
	2.2	TRAES3BF156900010CFD_t1	--
	2.5	Traes_7DS_0FFF2FB02.2	coatomer, subunit beta'
	2.5	Traes_4AL_03723C140.1	coatomer, subunit beta'
	2	Traes_2AL_2F860EA8F.1	interleukin-1 receptor-associated kinase 1
	2	Traes_1AL_041EBB4A6.2	myb proto-oncogene protein, plant
miR160a-3p	2.5	Traes_2BS_D32231DB0.1	DELLA protein
	2.2	Traes_4AL_00D18D2CC.1	plastocyanin
miR160a-5p	0.5	Traes_2DL_EF12C0B89.2	--
	2	Traes_5AL_836409322.1	cell division cycle 20-like protein 1, cofactor of APC complex
	2	Traes_6AS_626A3D38C.1	UDP-glucose:(indol-3-yl)acetate beta-D-glucosyltransferase
	0.5	Traes_1BL_54CD82AC3.1	auxin response factor
	0.5	Traes_2AL_C70217249.1	auxin response factor
	1.8	Traes_4DL_7BD111225.1	cell division cycle 20-like protein 1, cofactor of APC complex
	2	Traes_6BL_ADA9A4379.1	cell division cycle 20-like protein 1, cofactor of APC complex
	0.5	Traes_7BL_18D335F08.2	--
	2.5	Traes_1DL_C06754AD1.1	E3 ubiquitin-protein ligase RLIM
	1	Traes_2BL_95ECD7C24.1	auxin-responsive protein IAA
	0.5	Traes_1AL_147CF243C.1	auxin response factor
	2	Traes_2BS_759FEB9DB.2	cell division cycle 20-like protein 1, cofactor of APC complex
	0.5	Traes_7AL_E3ADC8C38.1	auxin response factor
	0.5	Traes_7DL_55ADB3528.1	auxin response factor
	0.5	Traes_6AL_232AF0B76.1	--
	0.5	Traes_1DL_AEC2F3FB3.1	auxin response factor
	1.8	Traes_4BL_E49000B89.2	cell division cycle 20-like protein 1, cofactor of APC complex
miR161.2	1.5	Traes_1DL_D83635E2B.1	DNA ligase 1
	1.5	Traes_1AL_38CE2200B.1	DNA ligase 1
miR164a	1.5	Traes_2BL_6AEE8AC28.1	polyadenylate-binding protein
	2.5	TRAES3BF060500040CFD_t1	E3 ubiquitin-protein ligase SIAH1
	2.5	Traes_2DL_8CBB9B56F.1	La-related protein 7
	2	Traes_6DL_190B08276.1	solute carrier family 24 (sodium/potassium/calcium exchanger), member 6
	2.2	Traes_4AL_822582A19.1	homeobox-leucine zipper protein
	1.5	Traes_7AL_BE3253C8F.1	polyadenylate-binding protein
	1.5	Traes_7AL_628A69311.1	polyadenylate-binding protein
	1.5	Traes_7DL_91CFE828F.1	polyadenylate-binding protein
	2	Traes_2AL_161C436B4.1	LRR receptor-like serine/threonine-protein kinase FLS2
	2.2	Traes_7AL_BFBB2AD1E.2	--
	1.5	Traes_2AL_57BF37A86.1	polyadenylate-binding protein
	2.5	Traes_3B_FD8ACC50C.1	E3 ubiquitin-protein ligase SIAH1
	1.5	Traes_7BL_F1A0270C6.1	--
	2	Traes_7DS_35DE283B8.1	deoxyribodipyrimidine photo-lyase
	2	Traes_1BL_5A31CB72E.2	xanthine dehydrogenase/oxidase
	2	Traes_4DS_AD829B4BA.1	--
	2.5	TRAES3BF060400070CFD_t1	E3 ubiquitin-protein ligase SIAH1
	2	TRAES3BF092100110CFD_t1	interleukin-1 receptor-associated kinase 4
	2	Traes_7BS_38B13C5A1.1	deoxyribodipyrimidine photo-lyase
	1.5	Traes_4DS_C08BF9DB2.1	sucrose-phosphate synthase
	1.5	Traes_5BS_9F043AE17.1	polyadenylate-binding protein
	1.5	Traes_7DL_1E343B6E6.1	--
	1.8	Traes_7AL_AF1AA9D9E.2	E3 ubiquitin-protein ligase RGLG
	1.5	Traes_5AS_E5FD82E36.2	polyadenylate-binding protein
	1.5	Traes_5DS_511F35A45.1	--
	2.2	Traes_7DL_BDD45DB24.2	polyadenylate-binding protein
miR164c-3p	2.5	Traes_6BS_063751B25.1	galacturan 1,4-alpha-galacturonidase
	2.5	Traes_5AL_15556724B.2	signal peptide peptidase-like 2B
	2	Traes_7BL_7992F4D60.2	protein phosphatase 1G
	2	Traes_2BS_87E3BCB91.2	--
	2.5	Traes_5DL_451405F2E.2	signal peptide peptidase-like 2B
	2	TRAES3BF053500090CFD_t1	--
	2	Traes_7DL_B3141A94A.2	protein phosphatase 1G
	2	Traes_7AL_22CDB6A0F.2	protein phosphatase 1G
	2	Traes_7DS_371D15223.1	inversin
	1.5	Traes_2DS_CCA2FCCAD.1	DELLA protein
	1.5	Traes_2AS_7BD3963BD.1	DELLA protein
	2	Traes_5BL_77D18C784.2	hydroxypyruvate reductase 1
miR165a-5p	1.8	Traes_1DS_600BCF31D.2	--
	1.8	Traes_3AL_037E918B6.2	exportin-5
	2.5	Traes_4BL_AB6EA9652.1	cyclin-dependent kinase 2
	2	Traes_4AL_C73F0C2A5.1	ATP-dependent RNA helicase DHX8/PRP22
	2	Traes_4BL_A171F7CD9.1	--
	2.5	Traes_3AL_EC88E6551.3	--
	1.8	Traes_3DL_6F3E38967.2	exportin-5
	1.8	Traes_1BS_174B16F1D.2	importin subunit beta-1
	2.5	Traes_7DL_8EAE3F02B.1	Prp8 binding protein
	2.5	Traes_7AL_9A4A4F498.1	Prp8 binding protein
	2	Traes_4DS_BAC9ECFD3.1	ATP-dependent RNA helicase DHX8/PRP22
	2.2	Traes_3AS_4DFC0A04D.11	cysteine desulfurase / selenocysteine lyase
	2.2	Traes_3B_5D70A98B6.1	exportin-5
	2	Traes_4BS_A171F7CD9.1	--
miR167a	1.8	TRAES3BF035600040CFD_t1	--
miR167e-3p	2.5	Traes_7DS_7375BED72.2	auxin response factor
	2.5	Traes_7BS_3FD792335.1	auxin response factor
	2.5	Traes_1AL_680ECC3CB.1	--
	2.5	Traes_2AS_C73DE621D.1	polyadenylate-binding protein
	2.5	Traes_1DL_2C8ED0E55.1	--
	2.5	Traes_7AS_1C1077D77.1	auxin response factor
	2.5	Traes_4AL_F2A9EFD8F.1	--
	1.8	Traes_5BL_70975BD62.2	UDP-glucosyltransferase BX9
miR168-3p	2.5	Traes_4BS_D9C942644.1	14-3-3 protein epsilon
	2	Traes_1AL_0B9EA6007.1	ubiquilin
	2	Traes_1DL_1BB7F42CF.2	ubiquilin
	2	Traes_1BL_5FFF3DBA5.1	ubiquilin
miR168a-5p	2.5	Traes_5DS_EC1C1EB53.1	ATP-dependent RNA helicase DHX8/PRP22
	2	Traes_1DL_596D40353.1	--
	2	Traes_1AL_904F85D72.1	--
	2.5	Traes_5AS_9EA753256.2	ATP-dependent RNA helicase DHX8/PRP22
	2.5	Traes_6DL_F17780DD5.1	ATP-dependent RNA helicase DHX8/PRP22
	2	Traes_1BL_A54F3943B.1	--
miR169b-3p	1.5	Traes_6DL_5DBBFECCE.1	--
	1.5	Traes_6BL_D65EC1432.2	--
	1.5	Traes_6DL_0FE23AAD8.2	--
	1.5	Traes_6AL_E36FCEF64.2	--
	1.5	Traes_6DL_3D278E90B.1	--
miR170-3p	1	Traes_6DL_26DDCA106.1	DELLA protein
miR171a-3p	2	Traes_2DS_C4613D6D1.1	mediator of RNA polymerase II transcription subunit 14
	2	Traes_2BS_F7C035436.2	mediator of RNA polymerase II transcription subunit 14
	0	Traes_6DL_26DDCA106.1	DELLA protein
miR171b	2.5	Traes_2BS_F7C035436.2	mediator of RNA polymerase II transcription subunit 14
	2.5	Traes_2DS_C4613D6D1.1	mediator of RNA polymerase II transcription subunit 14
	0.5	Traes_6DL_26DDCA106.1	DELLA protein
miR172a-5p	2.5	Traes_5BL_F1B805D4A.1	signal peptidase I
	2	Traes_6AS_9596E4B58.1	transcription factor E2F3
	2	Traes_4AL_D026163B1.2	vacuolar protein 8
	2	Traes_5AL_6DC4E5956.2	ethylene-insensitive protein 2
	2	Traes_4BS_B5D6A6603.2	vacuolar protein 8
	2.5	Traes_1AS_5AB632F011.3	disease resistance protein RPM1
	2	Traes_6BL_9E32698BB.2	transcription factor E2F3
	2.5	Traes_1DS_44680DEBE.3	disease resistance protein RPM1
	2.5	Traes_4AS_26464994E.1	--
	2	Traes_4DS_E8591A581.1	vacuolar protein 8
	2.5	Traes_5AL_E1AC12AED.2	signal peptidase I
	2.5	Traes_5AS_A928BA201.1	--
	1	Traes_2BL_7E0724A29.2	interleukin-1 receptor-associated kinase 1
	2.5	Traes_6DL_BFA17C21D.1	--
miR319a-3p	2	Traes_2DL_F177646BE1.2	KUP system potassium uptake protein
	1.5	Traes_3DL_D9A29948B.2	myb proto-oncogene protein, plant
	2.5	Traes_2BS_A7A5815B1.1	checkpoint serine/threonine-protein kinase
	1.5	Traes_1BL_CF98E922B.1	myb proto-oncogene protein, plant
	2	Traes_2BS_516E113D8.1	zeta-carotene desaturase
	2.2	Traes_1AL_A7100841D.2	--
	2	Traes_7DS_3B36A2851.1	molecular chaperone DnaJ
	1.5	Traes_3AL_F09C7CA19.1	myb proto-oncogene protein, plant
	2	Traes_7AS_2096F5B96.1	molecular chaperone DnaJ
	1.5	TRAES3BF027700010CFD_t1	myb proto-oncogene protein, plant
	2.5	Traes_2AS_D22B93277.4	checkpoint serine/threonine-protein kinase
	1.5	Traes_1DL_25540DE53.2	myb proto-oncogene protein, plant
	1.5	Traes_1AL_041EBB4A6.2	myb proto-oncogene protein, plant
	2.5	Traes_4DS_7175DCB1E.1	--
	2.5	Traes_5DS_643EDFE5B.2	--
	2	Traes_7BS_B0F8D23B0.1	molecular chaperone DnaJ
	2.5	Traes_5BS_77558D2A3.2	callose synthase
miR319c	1.5	Traes_3AL_F09C7CA19.1	myb proto-oncogene protein, plant
	1.5	TRAES3BF027700010CFD_t1	myb proto-oncogene protein, plant
	1.5	Traes_3DL_D9A29948B.2	myb proto-oncogene protein, plant
	2	Traes_1DL_25540DE53.2	myb proto-oncogene protein, plant
	2	Traes_1AL_041EBB4A6.2	myb proto-oncogene protein, plant
	2	Traes_1BL_CF98E922B.1	myb proto-oncogene protein, plant
miR390a-5p	2	Traes_2AL_8DFB52620.2	LRR receptor-like serine/threonine-protein kinase FLS2
	2.5	Traes_1AL_BA617FA40.1	--
	2	Traes_2BL_163E881AA.1	interleukin-1 receptor-associated kinase 4
	2.5	Traes_4AL_164AE6949.1
	1.8	Traes_3AL_D6BFA54C3.1	interleukin-1 receptor-associated kinase 1
	2.5	Traes_2DL_D2D68FAFC.1	interleukin-1 receptor-associated kinase 4
	2.5	Traes_7AS_F8FB007E9.2	large subunit ribosomal protein L41
	1.8	Traes_1AS_AE4FDD91A.2	LRR receptor-like serine/threonine-protein kinase FLS2
	2	Traes_2DL_3F691BC13.1	interleukin-1 receptor-associated kinase 4
	2.2	Traes_1DS_B5F4582B9.1	--
	2.5	Traes_7DS_6233E5A7D.1	large subunit ribosomal protein L41
	1.5	Traes_2BL_0B71CC07A.2	interleukin-1 receptor-associated kinase 4
	2.5	Traes_7BS_E02DEC947.1	large subunit ribosomal protein L41
	1.8	TRAES3BF094400100CFD_t1	interleukin-1 receptor-associated kinase 1
	2.5	Traes_6AL_4A505E21A.1	multidrug resistance protein, MATE family
	1.8	Traes_2AL_8B764E9DD.2	interleukin-1 receptor-associated kinase 4
	2.5	Traes_4DS_B8A5D78BD.1	interleukin-1 receptor-associated kinase 1
	2.5	Traes_1DL_2938B9977.1	protein brassinosteroid insensitive 1
miR393-5p	1	Traes_1BS_4BA296C26.2	transport inhibitor response 1
	1	Traes_2AL_9EC359B65.2	transport inhibitor response 1
	1	Traes_2BL_370AE211F.1	transport inhibitor response 1
	1	Traes_2DL_F0FEB5383.2	transport inhibitor response 1
	1	Traes_1DS_1847DA30E.1	transport inhibitor response 1
	1	Traes_1AS_EF9022F0F.1	transport inhibitor response 1
miR393b-3p	2.2	Traes_2BL_70B425A83.1	--
	2.5	TRAES3BF034800070CFD_t1	E3 ubiquitin-protein ligase RNF1/2
	2.2	Traes_2AL_1F06B7AB4.1	structure-specific endonuclease subunit SLX1
	2.5	Traes_3DL_CC2CE8F7B.1	E3 ubiquitin-protein ligase RNF1/2
	2.2	Traes_2DL_1C171DF7E.2	--
miR394a	0	Traes_3AL_63EBED1DE.1	transcription factor IIIB 90 kDa subunit
	2.5	TRAES3BF159700020CFD_t1	--
	0	TRAES3BF026800020CFD_t1	transcription factor IIIB 90 kDa subunit
	2	Traes_1DL_F23E9DAA9.1	RNA polymerase sigma factor
	2.5	Traes_6AS_E72EA73B9.1	DNA-directed RNA polymerase III subunit RPC2
	0	Traes_3DL_DABAFB184.1	--
miR394a-3p	2.5	Traes_4BL_8DD2CD047.1	sterol-4alpha-carboxylate 3-dehydrogenase (decarboxylating)
	2.5	Traes_3AL_F199315AA.3	--
miR395a	0	Traes_4BL_04956D80D.2	sulfate transporter 2, low-affinity
	0	Traes_4AS_8944253DC.1	sulfate transporter 2, low-affinity
	0	Traes_4DL_58C874E07.1	sulfate transporter 2, low-affinity
	2.5	Traes_2BS_97934559D.2	--
miR396b-3p	2	Traes_3B_DC8E9BEF2.1	--
	2	Traes_3DL_247F72C8D.1	--
miR396b-5p	2.5	Traes_5AL_0C2D144B0.1	molecular chaperone HtpG
	2.2	Traes_1DS_B3ADFC8B2.1	interleukin-1 receptor-associated kinase 1
	1.8	Traes_3AS_532AA23A1.1	--
	2.5	Traes_5BL_0F3A986F9.2	molecular chaperone HtpG
	2.5	Traes_7BS_1A6D16C6B.1	molecular chaperone HtpG
	2.5	Traes_5DL_89CF7F5DE.1	molecular chaperone HtpG
	2.5	Traes_7AS_76670DCAB.1	molecular chaperone HtpG
	2.5	TRAES3BF090100020CFD_t1	nucleolin
miR397-3p	2.5	TRAES3BF063300020CFD_t1	interleukin-1 receptor-associated kinase 1
	2.5	Traes_1BL_57BAD3C3C.2	COMPASS component SWD3
	2.5	TRAES3BF063600020CFD_t1	interleukin-1 receptor-associated kinase 1
	2.5	Traes_1DL_83AA90CEA.2	COMPASS component SWD3
miR397a	1	Traes_1BS_A2F5A3F39.1	laccase
	2	Traes_2BS_7D1EAFCF4.1	laccase
	2	Traes_5DL_E642CCD5A.1	laccase
	1	Traes_1AS_4A6E603D3.1	laccase
	2	Traes_3DL_E9BC40788.1	laccase
	1.5	TRAES3BF032900050CFD_t1	laccase
	2	Traes_2DS_82B24AAC6.1	laccase
	2	TRAES3BF090100120CFD_t1	laccase
	2	TRAES3BF094000020CFD_t1	laccase
	2.2	Traes_2BL_09BC0104D.1	laccase
	1	Traes_1DS_FEFAE4EB7.1	laccase
	1.5	Traes_5BL_2AB4CA5B6.1	laccase
	1.5	Traes_4DL_91DF15F5B.1	laccase
	2	Traes_3B_29C2301AA.1	laccase
	2	Traes_3AL_23D8F56A8.1	laccase
	0	Traes_6AS_56FCD068F.1	--
	2	Traes_1BL_1DC733937.1	laccase
	1.5	Traes_4AS_DC872C10F.1	laccase
	2	Traes_1AL_0007E2761.1	laccase
	2	Traes_4BL_3EAE23E69.1	laccase
miR398a-3p	2.5	Traes_2BS_6015BC7C6.1	superoxide dismutase, Cu-Zn family
	2.5	Traes_2DS_3C3A2A12A.2	superoxide dismutase, Cu-Zn family
	0	Traes_3AL_BA847A16F.1	integrator complex subunit 9
	0	Traes_3B_E1131EA03.1	integrator complex subunit 9
	0	Traes_3DL_3FD1C807F.2	integrator complex subunit 9
miR398f-5p	2.2	Traes_2BL_8F3F35C0D.2	CLIP-associating protein 1/2
	2	Traes_2AS_8B5064BB81.3	mitochondrial import inner membrane translocase subunit TIM17
	2.2	Traes_5DL_3CD4039DA.2	--
	2.2	Traes_4AL_3D689F240.1	--
	2	Traes_7AL_26B0EBEE6.1	DnaJ homolog subfamily C member 11
	2.2	Traes_2DL_9F8AC7245.2	CLIP-associating protein 1/2
	1.5	Traes_3B_E1131EA03.1	integrator complex subunit 9
	2	Traes_5AL_E1A97385C.1	DnaJ homolog subfamily C member 11
	2.2	Traes_5BL_852C4D56F.1	--
miR408d	2.2	Traes_3AS_F7E2D80DD.1	lysophosphatidylcholine acyltransferase / lyso-PAF acetyltransferase
	2.2	Traes_6BL_56D72F728.2	interleukin-1 receptor-associated kinase 4
	2	Traes_5BL_0212ACBD9.1	myosin heavy chain
	0.5	Traes_4AL_364F56EDB.1	--
	1.8	Traes_6BL_E523688BA.1	--
	2.5	Traes_5BL_E13A2FBD01.1	hydroperoxide dehydratase
	2.5	Traes_4AS_622EEFE10.2	Cu2+-exporting ATPase
	1	Traes_5BL_7486582EB.1	--
	0.8	Traes_4DL_A7AFE1359.1	--
	1.8	Traes_6AL_01D5C5F02.1	--
	0.5	Traes_5DL_90BD9F306.1	--
	0.8	Traes_4BL_217ED47D4.1	--
	0.8	Traes_4AS_B726A789E.1	--
	1.8	Traes_7DS_43E46F49E.1	uncharacterized protein
	2.5	Traes_4BL_6F94B70B9.2	Cu2+-exporting ATPase
	1.2	Traes_5BL_3AD291756.2	--
	1.8	Traes_6DL_14DF1A5E4.1	--
	2.5	Traes_4DL_385639507.1	Cu2+-exporting ATPase
	2	Traes_4AL_E9B779879.1	--
	1	Traes_5DL_EBC94F429.1	--
	1.8	Traes_5AL_E5379D3A1.1	--
	2	Traes_5BS_E10756355.1	myosin heavy chain
	0.8	Traes_7AS_B17BC0FC2.1	uncharacterized protein
	1.8	Traes_6AL_AF2F7C5CE.1	--
	2	Traes_4DS_168A4CF2D.1	--
miR444b.1	1	Traes_6DL_D1C1DBD34.1	MADS-box transcription factor, plant
	0	Traes_2AL_E7BD86A10.2	MADS-box transcription factor, plant
	0	Traes_2BL_80C552D51.1	MADS-box transcription factor, plant
	1	Traes_6AL_7E93329AC.4	--
	2.2	Traes_2DS_C5644B902.1	structure-specific endonuclease subunit SLX1
	0	Traes_2DL_0A0C46F2D.1	MADS-box transcription factor, plant
	2.2	Traes_2DS_C5644B9021.1	structure-specific endonuclease subunit SLX1
	1	Traes_6BL_8C056134E.2	MADS-box transcription factor, plant
miR482b	2	Traes_4AL_F8D68EF65.1	disease resistance protein RPM1
	2	Traes_1BS_14EE461B0.1	structure-specific endonuclease subunit SLX1
	1.5	Traes_2BS_37A5902AE.2	disease resistance protein RPM1
	2	Traes_7AS_C59BD59BF.2	disease resistance protein RPM1
	1.5	Traes_2DS_7826103D4.1	disease resistance protein RPM1
	2	Traes_7DS_9881A234E.1	disease resistance protein RPM1
	2	Traes_7DS_F474E22D7.1	disease resistance protein RPM1
	2	Traes_5AL_6F0E92533.1	disease resistance protein RPM1
	2	Traes_1AL_324584CCA.1	structure-specific endonuclease subunit SLX1
	2	Traes_7AS_20DA8BEF2.3	disease resistance protein RPM1
	1.5	Traes_2AS_E022ED09E.1	disease resistance protein RPM1
	2	Traes_2BL_888327E48.2	disease resistance protein RPM1
	2	Traes_7AS_6041D0C1C.1	disease resistance protein RPM1
	2	Traes_4AL_17CAE3587.2	disease resistance protein RPM1
	2	Traes_7AS_92309F32F.1	disease resistance protein RPM1
	2.5	Traes_7AL_D43BFF01D.1	--
miR482b-3p	2	Traes_7DS_4BB2781DA.1	structure-specific endonuclease subunit SLX1
	2	Traes_7DS_08C5BD141.1	structure-specific endonuclease subunit SLX1
	1.5	Traes_1BS_A55A5F413.1	structure-specific endonuclease subunit SLX1
	2.5	Traes_4DS_C6648E862.2	signal recognition particle subunit SRP54
	2	Traes_7BL_9236B1130.2	ATP-binding protein involved in chromosome partitioning
	2.5	Traes_2AL_C3455887C.1	structure-specific endonuclease subunit SLX1
	1.5	TRAES3BF033900120CFD_t1	disease resistance protein RPM1
	1.5	Traes_7BL_D0AF3A86B.2	enhancer of mRNA-decapping protein 4
	2	Traes_6DL_9FA2A65AB.1	ATP-binding protein involved in chromosome partitioning
	2.5	Traes_1DS_01434AA43.1	disease resistance protein RPM1
	1.5	Traes_3AS_4A958FB4D.1	disease resistance protein RPM1
	2.5	Traes_1BS_0DF6B2DC7.2	disease resistance protein RPM1
	2	Traes_6AL_BC88BF232.2	ATP-binding protein involved in chromosome partitioning
	2.5	Traes_1DL_39B0D97A0.2	structure-specific endonuclease subunit SLX1
	2.5	Traes_4BS_7111CD9721.2	signal recognition particle subunit SRP54
	0.5	TRAES3BF028300020CFD_t1	disease resistance protein RPM1
	0.5	Traes_3AL_2F01E902F.1	disease resistance protein RPM1
	2	Traes_5DS_AB8B8F3F1.1	leucine-rich repeat protein SHOC2
	2.5	Traes_4BS_7111CD972.2	signal recognition particle subunit SRP54
	0.5	Traes_3DL_49FD28DD1.1	disease resistance protein RPM1
	2.5	Traes_2DL_ADACB74CD.1	structure-specific endonuclease subunit SLX1
	1.5	Traes_3DS_EAEE9D5C2.1	disease resistance protein RPM1
	2	Traes_7DS_B4368DB84.1	structure-specific endonuclease subunit SLX1
	2.5	Traes_6DL_A4387A27F.2	leucine-rich repeat protein SHOC2
	2	Traes_7AS_012456226.1	--
	2	Traes_7DS_56AAA49EB.2	structure-specific endonuclease subunit SLX1
	2	Traes_6BL_71F509AEA.2	ATP-binding protein involved in chromosome partitioning
	2.5	Traes_2BL_A36746901.3	disease resistance protein RPM1
	2.5	Traes_4AL_DFCF80A9A.1	signal recognition particle subunit SRP54
	2	Traes_7DS_9DFE7B817.1	structure-specific endonuclease subunit SLX1
miR528-5p	2.5	Traes_4BL_8E58F5D47.2	phosphoglucomutase
	2	Traes_7DS_43E46F49E.1	uncharacterized protein
	2.5	Traes_5DL_81B7F12B4.1	--
	2.5	Traes_5BL_D3ACCE93B.1	--
	2.5	Traes_1DS_FF7D2C424.1	--
miR528a-3p	1.8	Traes_3AL_19C27E74D.1	large subunit ribosomal protein L9e
	2.5	Traes_6AS_9EB477620.1	--
miR530-3p	2	Traes_4AS_5F95A9C48.2	golgi-specific brefeldin A-resistance guanine nucleotide exchange factor 1
miR530-5p	2.5	Traes_5AL_E32D685B5.1	fumarylacetoacetase
	1.5	Traes_5DL_E88449625.2	AP2-like factor, euAP2 lineage
	2	Traes_4BS_0BB541B53.1	small subunit ribosomal protein S21
	1.5	Traes_4AL_B3963A0E7.1	large subunit ribosomal protein L9e
	2	Traes_4BS_1207AFDD0.1	small subunit ribosomal protein S21
	1.5	Traes_3DL_303B74AF1.1	--
miR531	2.5	Traes_2AL_2EC22F658.1	transitional endoplasmic reticulum ATPase
	2	TRAES3BF062500070CFD_t1	--
miR535a	2.5	Traes_2BL_3CC2778DE.1	cofilin
	2.5	Traes_2AL_4BD26CDF2.1	cofilin
	1.5	Traes_2DL_4304CCAF6.1	cofilin
miR771	2	Traes_2DL_5A75E907E.1	magnesium/proton exchanger
miR827	2.5	Traes_2AL_608FCBC83.1	D-3-phosphoglycerate dehydrogenase
	1.5	Traes_2AL_956419DF5.1	MFS transporter, ceroid-lipofuscinosis neuronal protein 7
	2	Traes_6BL_005314A5D.1	MFS transporter, ceroid-lipofuscinosis neuronal protein 7
	0	Traes_2BL_FDF5ED8FA.1	--
	1.5	Traes_2DL_0DD946101.1	MFS transporter, ceroid-lipofuscinosis neuronal protein 7
	2	Traes_6DL_20A343A96.2	MFS transporter, ceroid-lipofuscinosis neuronal protein 7
	2	Traes_6AL_2B4A305CD.3	MFS transporter, ceroid-lipofuscinosis neuronal protein 7
miR845c	0.5	Traes_7DL_49E53BDD5.1	interleukin-1 receptor-associated kinase 4
	0.5	Traes_7DL_49E53BDD51.1	interleukin-1 receptor-associated kinase 4
miR858b	2	Traes_2DL_AB324879E.1	respiratory burst oxidase
	2.5	Traes_3AL_5990F914F.1	PHD and RING finger domain-containing protein 1
	2.5	TRAES3BF057800070CFD_t1	PHD and RING finger domain-containing protein 1
	2.5	Traes_3DL_845402F4B.1	myb proto-oncogene protein, plant
	2	Traes_2BL_C7CDCB39A.1	respiratory burst oxidase
	2.2	Traes_3DS_A0676BAEA.1	myb proto-oncogene protein, plant
	1.8	Traes_4AL_17C974117.1	myb proto-oncogene protein, plant
	2	Traes_4DL_26A958CDD.1	myb proto-oncogene protein, plant
	1.8	Traes_4AS_3883DC244.1	myb proto-oncogene protein, plant
	2	Traes_4DL_8A9D9ACCB.1	myb proto-oncogene protein, plant
	1.8	Traes_2AL_AF9357B4C.1	myb proto-oncogene protein, plant
	1.8	Traes_4BS_F83CB32DD.1	myb proto-oncogene protein, plant
	2	Traes_2AL_2A274FDB8.1	respiratory burst oxidase
	1.8	Traes_4DL_967152326.1	myb proto-oncogene protein, plant
	2.5	TRAES3BF016200140CFD_t1	myb proto-oncogene protein, plant
	1.8	Traes_4BL_FE8B8ABC4.1	myb proto-oncogene protein, plant
	2.5	Traes_3AL_7C031019E.1	myb proto-oncogene protein, plant
miR862-5p	2.5	Traes_7AL_AB7A2AB91.1	interleukin-1 receptor-associated kinase 1
	2.5	Traes_7DL_6D0B74E28.1	interleukin-1 receptor-associated kinase 1
	2.5	Traes_7BL_756DF9D13.1	interleukin-1 receptor-associated kinase 1
miR869.1	2.5	Traes_2BL_919DD0DC3.2	interleukin-1 receptor-associated kinase 4
	2.5	Traes_6AS_BA6B25C1B.2	protein transport protein SEC61 subunit gamma and related proteins
	2.2	Traes_5AS_C74ABA5EF.2	interleukin-1 receptor-associated kinase 1
	2.2	Traes_5DS_711714943.2	interleukin-1 receptor-associated kinase 1
	2.5	Traes_2DL_45299D667.2	interleukin-1 receptor-associated kinase 4
miR893	2	Traes_5BL_1F78C01BF.1	--
	1.8	Traes_1BL_C25B5DDB4.2	myb proto-oncogene protein, plant
	2.5	Traes_7AS_8E7DD5137.1	ATP-dependent Clp protease ATP-binding subunit ClpB
	2	Traes_5AL_0F68254CB.1	--
	2.5	Traes_2AL_7E9927674.1	--
	2.5	Traes_2BL_E6E029813.1	--
	2.5	Traes_1DL_5F7868CCC.1	senescence-induced receptor-like serine/threonine-protein kinase
	1.8	Traes_1DL_B26A733D4.1	myb proto-oncogene protein, plant
miR894	2.5	Traes_5DL_757B70C3E.1	platelet-activating factor acetylhydrolase
	2	Traes_2DL_09A84CB09.1	--
	2.5	Traes_5BL_B7EEBA1BA.2	platelet-activating factor acetylhydrolase
	2.5	Traes_5AL_669973CCB.2	platelet-activating factor acetylhydrolase
miR952b	2	Traes_4AS_9C1CB8D5A.2	brefeldin A-inhibited guanine nucleotide-exchange protein
	2.5	Traes_5BL_DF71B517D.1	--
	2.5	Traes_4AS_1B92F154A.2	--
	2	Traes_6DL_D13BC7AA7.1	cell division cycle 20, cofactor of APC complex
	2.5	Traes_6AS_4AE6E4A0D.1	ubiquitin carboxyl-terminal hydrolase 36/42
	2.5	Traes_1DL_92BCA55C0.2	auxin response factor
	2	Traes_4AS_FBE6E9974.1	arsenite-transporting ATPase
	2.5	Traes_6BL_E21C6FFC3.2	ubiquitin carboxyl-terminal hydrolase 36/42
	2.5	Traes_6DS_D2658E3DE.2	ubiquitin carboxyl-terminal hydrolase 36/42
	1.2	Traes_7DL_0B4336C25.2	delta24-sterol reductase
	2.5	Traes_7BL_251D13E32.2	--
	2.5	TRAES3BF110400030CFD_t1	interleukin-1 receptor-associated kinase 4
	1.2	Traes_7AL_6322B76E7.2	delta24-sterol reductase
	2	Traes_4AL_FF5E69BBD.1	--
	2	Traes_3DL_1873B5327.1	hydroxymethylglutaryl-CoA reductase (NADPH)
	2.5	Traes_5DL_3DC2BCA00.1	--
	1.2	Traes_7BL_2665C926D1.3	delta24-sterol reductase
	2.5	Traes_4DS_382887723.1	OPC-8:0 CoA ligase 1
	2	Traes_3AL_3B13012AD.1	--
	2	Traes_1DL_78AAD9D20.1	plastin-1
miR1023a-3p	1.8	Traes_3B_B5F5878BB.1	cleavage stimulation factor subunit 3
miR1044-3p	2	Traes_4BL_41F1D5034.1	ATP-dependent Clp protease ATP-binding subunit ClpB
	2.5	Traes_1AS_8137937E1.1	interleukin-1 receptor-associated kinase 1
	2	Traes_2AL_F81E950E1.1	abnormal spindle-like microcephaly-associated protein
	2.2	Traes_7AS_E7E7216A8.1	protein regulator of cytokinesis 1
	2.5	Traes_5AS_07D8C9EB9.1	cyclic pyranopterin phosphate synthase
	2.5	Traes_1DL_9FB53E48A.1	homeobox-leucine zipper protein
	1	Traes_4DS_43C7643F7.2	cytochrome b6-f complex subunit 5
	2	Traes_3AS_5E392FE16.2	--
	2	Traes_7DS_CA3308ED9.1	tRNA (cytidine/uridine-2'-O-)-methyltransferase
	2.2	Traes_5AL_E644A6A0B.1	sentrin-specific protease 8
	2	Traes_4AL_1F49A9D0D.2	ATP-dependent Clp protease, protease subunit
	2.2	Traes_6DL_DD22474D8.1	protein regulator of cytokinesis 1
	2.5	Traes_5AS_029A65B0A.2	MADS-box transcription factor, plant
	2.2	Traes_5BL_BCAA67AC6.1	homeobox-leucine zipper protein
	1.5	Traes_7DS_562FCFA13.2	ATP-dependent Clp protease, protease subunit
	1.8	TRAES3BF173900050CFD_t1	valyl-tRNA synthetase
	2.5	Traes_5BL_049CB21F11.1	--
	2.5	Traes_7AS_4341FB0C4.1	jasmonate O-methyltransferase
	1.5	Traes_1DL_DB21B17C5.2	--
	1.8	Traes_3DS_759A72524.2	integrator complex subunit 11
	1.8	Traes_7AS_C9C8CB3B2.2	tRNA (cytidine/uridine-2'-O-)-methyltransferase
	2.5	TRAES3BF156000070CFD_t1	gelsolin
	2.2	Traes_6BL_EB20B51C3.1	protein regulator of cytokinesis 1
	1.8	Traes_1DS_AFF2A1D09.1	integrator complex subunit 11
	2	Traes_4DS_CE3D7442C.1	polyneuridine-aldehyde esterase
	2.5	Traes_6DL_EAF694645.1	--
	1.8	Traes_1BS_DBE61AB2F.2	integrator complex subunit 11
	2.5	Traes_4AL_70CEA3062.1	polyneuridine-aldehyde esterase
	2.5	Traes_3AL_604DF865E.2	gelsolin
	2.5	Traes_5DS_3EBE121C7.1	MADS-box transcription factor, plant
	2	Traes_4AL_603B6DC64.1	ATP-binding cassette, subfamily G (WHITE), member 2
	2.2	Traes_6AL_DC48CF291.2	protein regulator of cytokinesis 1
	2.2	Traes_7DS_424252139.1	protein regulator of cytokinesis 1
	2.5	TRAES3BF071100010CFD_t1	cyclic pyranopterin phosphate synthase
	2.5	Traes_3AL_D207C9374.1	3-hydroxyisobutyryl-CoA hydrolase
	2	Traes_7AS_090FDB9B1.1	ATP-dependent Clp protease, protease subunit
	2.5	Traes_5AS_6B1DBD479.1	formin 2
	1.8	Traes_3AS_2388C9B01.1	integrator complex subunit 11
	2.5	Traes_3DL_AD4084371.2	gelsolin
	2.5	Traes_1DS_EFAA7ABBC.1	coatomer, subunit beta'
	1.8	Traes_1AS_B34BC5323.1	integrator complex subunit 11
miR1061-3p	2.2	Traes_7BL_F4A311A08.3	deoxyribonuclease V
	2.5	Traes_4DL_B138DF6FC.1	ATP-binding cassette, subfamily C (CFTR/MRP), member 1
	2.5	Traes_6AL_3C182DED5.1	EREBP-like factor
	2.5	Traes_7AS_925C9ADA4.2	plastin-1
	2.2	Traes_7AL_DFB988FBA.2	deoxyribonuclease V
	2.2	Traes_2DL_099F54442.1	--
	1.8	Traes_1AL_C73885878.2	--
	2.2	Traes_1BL_68E4D6F70.1	T-complex protein 1 subunit epsilon
	1.8	Traes_1DL_ADAD51121.2	--
	1.8	Traes_1BL_F32B62E49.1	--
	2.5	Traes_5AL_FA71552A8.1	ATP-binding cassette, subfamily C (CFTR/MRP), member 1
	1.8	TRAES3BF027500020CFD_t1	--
	2.5	Traes_2BL_94A287CDF.2	structure-specific endonuclease subunit SLX1
	2.2	Traes_1DL_C509C7DC4.1	T-complex protein 1 subunit epsilon
	2.2	Traes_1AL_C1EF04361.1	T-complex protein 1 subunit epsilon
miR1117	2.5	Traes_1BL_8012EBC5A.2	ubiquitin carboxyl-terminal hydrolase 7
	2	Traes_6DL_E940A7985.1	solute carrier family 15 (peptide/histidine transporter), member 3/4
miR1118	2	Traes_2BL_07C9811CB.1	--
	2	Traes_4BS_4BC02509F.1	--
	1.8	Traes_7DL_8711D31FE.4	ribonuclease T2
	1.5	Traes_2BL_928000A2B.2	E3 ubiquitin-protein ligase HERC4
	0.8	Traes_1BS_19CAD4E6A.2	mitochondrial ATPase complex subunit ATP10
	1	Traes_2AL_584129044.2	palmitoyltransferase
	1.5	Traes_6BL_E14604962.3	polyadenylate-binding protein 2
miR1120	1.8	Traes_5BS_7C0EA9D4A.1	--
	1.8	Traes_6BS_E9D7788BF.2	--
	2	Traes_1BL_7C8FD5930.1	interleukin-1 receptor-associated kinase 4
	2.5	Traes_5BL_FD504C45C.1	uncharacterized protein
	1.8	Traes_5DL_A6EECBC04.1	--
	1.2	Traes_2DL_5750F91AA.1	U4/U6.U5 tri-snRNP-associated protein 1
	1	Traes_7BL_B78FAD060.1	glutathione S-transferase
	1	Traes_2DS_69E67704C.2	pyruvate dehydrogenase kinase 2/3/4
	1.5	Traes_3AS_0E7CB4B4A.2	sentrin-specific protease 1
	1.2	Traes_2DL_7511EDD3D.1	--
	2.2	Traes_4AS_6C23CE2D6.1	nuclear cap-binding protein subunit 1
	1	Traes_3DL_838442186.1	U3 small nucleolar RNA-associated protein 11
	2.2	Traes_3AL_B0A5AA3FD.1	heart-and neural crest derivatives-expressed protein 2
	2.5	Traes_6BS_FDDC181D1.1	20S proteasome subunit alpha 6
	2	Traes_2AS_913212C56.2	amino-acid N-acetyltransferase
	0.8	Traes_5AL_2D3FB375C.1	--
	2.2	Traes_4DS_990D31BB1.6	elongation factor 1-alpha
	1.8	Traes_2DL_3C9129432.1	ribosome assembly protein RRB1
	2.5	Traes_2DS_9520F146E.1	L-ascorbate oxidase
	2.2	Traes_3B_D3F75F9E9.1	zinc finger protein
	2.2	Traes_3AL_09BDFC4B4.2	--
	2	Traes_5AL_2C26B1FFC.1	E3 ubiquitin-protein ligase RNF38/44
	1.2	Traes_1DL_F9213AB33.1	KDEL-tailed cysteine endopeptidase
	2	Traes_4DS_E3FF7A34C.1	cystatin-C
	1.5	Traes_7DL_C1366F921.1	pentatricopeptide repeat domain-containing protein 1
	2	Traes_7AS_F38BE6DA7.1	signal recognition particle receptor subunit beta
	0.8	Traes_2DS_9BCFF2B80.1	--
	1.8	Traes_1DS_D08902BD6.1	interleukin-1 receptor-associated kinase 4
	1.2	Traes_6AL_3FB51E7F6.1	ATP-dependent Clp protease ATP-binding subunit ClpX
	1.8	Traes_3DL_1825C1F9E.1	prenylcysteine alpha-carboxyl methylesterase
	2	Traes_2BS_F4DF1DB26.2	transcription elongation factor B, polypeptide 2
	2.5	Traes_1AL_7FE24229E.2	protein KRI1
	1.8	Traes_4BL_A71648154.1	3-ketoacyl-CoA synthase
	0.5	Traes_4BL_CF3E56FCD.1	targeting protein for Xklp2
	1.8	Traes_6AL_8394C0D62.1	peptidyl-prolyl isomerase E (cyclophilin E)
	2.2	Traes_5AL_1311205EE.2	sacsin
	2.2	Traes_6DL_A95013422.2	sn1-specific diacylglycerol lipase
	1	Traes_1BS_4E905855D.1	small subunit ribosomal protein S3Ae
	2.5	Traes_6BS_D8B7C37B0.2	mTERF domain-containing protein, mitochondrial
	1.2	Traes_2DL_7D7B1B55D.1	1-deoxy-D-xylulose-5-phosphate synthase
	1.5	Traes_4BL_2ACE03C35.1	mlo protein
	2	Traes_7DS_EAE3FBECD.2	U4/U6 small nuclear ribonucleoprotein PRP3
	1	Traes_5DL_A061F2DD6.1	abnormal spindle-like microcephaly-associated protein
	1.5	Traes_6BL_F03DF2949.2	signal peptide peptidase-like 2B
	2.5	Traes_2BS_879851C74.1	annexin A7/11
	2	Traes_2DL_BCFBE0E93.2	alpha-amylase
	0.8	Traes_1AL_43F02DB49.1	dolichyl-diphosphooligosaccharide--protein glycosyltransferase
	1.5	Traes_1BS_D81E948D7.1	histone acetyltransferase
	1.8	Traes_1AS_801D9F0BC.1	beta-carotene isomerase
	1	Traes_5DL_B3C8DD9AA.1	--
	1.2	Traes_5AS_9DC956868.2	molecular chaperone DnaJ
	2	Traes_7DL_313D3CE50.1	solute carrier family 15 (peptide/histidine transporter), member 3/4
	1.8	Traes_4BL_A2081ED30.1	importin subunit beta-1
	2.5	Traes_7DL_C7C46033E.2	DNA-directed RNA polymerase III subunit RPC5
	2.5	Traes_4AS_5EDE61425.2	--
	1.8	Traes_1DL_66B426FE4.2	homeobox protein Meis1
	2.2	Traes_5AL_3976F401A.1	--
	0.5	Traes_6DL_F2CADEFF6.1	E3 ubiquitin-protein ligase RNF38/44
	2	Traes_1BS_A91580A151.2	interleukin-1 receptor-associated kinase 4
	1.8	Traes_5BL_769E8EB68.1	--
	1.5	Traes_5AL_CAF698B25.2	E3 ubiquitin-protein ligase SIAH1
	1	Traes_7DS_CAB1BF6AC.1	--
	1.5	Traes_7DL_DE178FDB4.1	tetraspanin-5
	1.2	Traes_5AL_6A1F041A8.1	UDP-glucose:(indol-3-yl)acetate beta-D-glucosyltransferase
	2.5	Traes_5DL_DDCD2701D.1	serine/threonine-protein phosphatase 2A regulatory subunit B'
	2	Traes_4DL_7C8234BD1.1	4-hydroxy-tetrahydrodipicolinate reductase
	2	Traes_6DS_11583F62A.1	ribonuclease H2 subunit C
	1	Traes_6BS_F87437638.3	--
	1	Traes_3DL_858101A78.2	DNA-directed RNA polymerase III subunit RPC4
	2	Traes_2DL_1497E5611.2	--
	2	Traes_5AS_244562A2A.1	--
	2	Traes_6AL_9F1580D39.1	beta-ring hydroxylase
	0.8	Traes_4DS_1EBE1B4E4.1	--
	1.5	Traes_4DL_60B937917.2	mlo protein
	1.8	Traes_2AL_1E3B3BC40.2	--
	0.8	Traes_2AL_EE1350B36.1	mTERF domain-containing protein, mitochondrial
	1.2	Traes_5BL_45662533A.1	--
	1.2	Traes_5DL_DFE47E78E.1	--
	0.8	Traes_7DL_EFB19C389.1	--
	2.5	Traes_3AL_3E4E162EE.1	myosin V
	1.8	Traes_2DL_33C07CAFB.1	--
	1.5	Traes_7BS_941D0F9E7.1	--
	1.2	Traes_6DL_36006E6FD.1	engulfment and cell motility protein 3
	1.5	Traes_2DL_3D4B9145A.1	--
	1.8	Traes_7AS_45F0BB787.2	--
	1.5	Traes_1AL_A46B5ED96.2	ATP-binding cassette, subfamily G (WHITE), member 2
	1	Traes_1AS_59404C639.1	--
	1.8	Traes_1DL_41E7D2C4E.1	alcohol dehydrogenase class-P
	2.5	Traes_5DS_DA18D86DC.1	protein KRI1
	0.8	Traes_4AS_049576319.2	cytochrome c oxidase assembly protein subunit 16
	2	Traes_1DS_783351B30.1	--
	2.2	Traes_3AL_04CD57FC2.1	magnesium transporter
	1.8	Traes_6DS_ED2783EA5.1	interleukin-1 receptor-associated kinase 1
	2	Traes_5AS_A977349961.2	F-box and leucine-rich repeat protein 2/20
	1	Traes_7AL_FFC5B8676.1	--
	2.2	Traes_2BS_A87D49831.1	pyruvate dehydrogenase kinase 2/3/4
	1.8	Traes_4BL_65AB61144.1	UDP-glucuronate decarboxylase
	2.2	Traes_2AS_D38A5E045.1	amidase
	2	Traes_1AS_1D5A1B790.2	mannosyl-oligosaccharide alpha-1,2-mannosidase
	1	Traes_2DS_C8CC2F963.1	ATP-dependent RNA helicase DDX21
	1.5	Traes_4BL_65EF527FF.1	interleukin-1 receptor-associated kinase 1
	1.5	Traes_5BL_9010C082A.1	hydroquinone glucosyltransferase
	1.5	Traes_6DS_6190B0566.1	ATP-binding cassette, subfamily A (ABC1), member 1
	2.5	Traes_2BL_A59C00F48.1	--
	2.2	Traes_6BS_CBD931158.4	mTERF domain-containing protein, mitochondrial
	2.2	Traes_4BL_BCC3FB7E7.1	--
	1.8	Traes_2BL_316434127.1	--
	2.5	Traes_6BS_812D3A692.1	mTERF domain-containing protein, mitochondrial
	2.5	Traes_7DL_73928596C.1	14-3-3 protein epsilon
	1	Traes_1AL_88C4E33E6.1	LRR receptor-like serine/threonine-protein kinase EFR
	1.8	Traes_7AL_96383AEEC.1	glucuronoxylan 4-O-methyltransferase
	2	Traes_2DS_D014BDCA2.1	pectinesterase
	1	Traes_7DL_82C99049D.1	premnaspirodiene oxygenase
	0.5	Traes_2AS_DACE53B24.2	(S)-2-hydroxy-acid oxidase
	2.2	Traes_6DS_016F70618.2	--
	0.8	Traes_3DS_561941A6E.1	steroid 3-oxidase
	2	Traes_3AS_993B34F61.1	--
	1.8	Traes_7BL_002EE3EC3.1	--
	1.5	Traes_5DL_F243512BC.2	--
	2.5	Traes_6DL_38B41C198.1	--
	2.5	Traes_3AL_ED29EBD89.2	prenylcysteine alpha-carboxyl methylesterase
	0.2	Traes_2AL_229EBA080.1	peroxidase
	2.2	Traes_7DS_1797D4951.1	pathogenesis-related protein 1
	0.8	Traes_1DL_9FE4D295D.2	--
	1.5	Traes_6DS_1B409CE95.1	callose synthase
	0.8	Traes_7AL_955F54182.1	KUP system potassium uptake protein
	2.5	Traes_1DL_CC4D484BB.5	--
	2	Traes_7DL_D1A06F4A0.1	carbonic anhydrase
	2.5	Traes_5AL_637B13721.2	--
	1.2	Traes_4AL_A99729A05.2	FUS-interacting serine-arginine-rich protein 1
	0.8	Traes_6DL_5CB149734.2	abnormal spindle-like microcephaly-associated protein
	1.5	Traes_4AS_CBEEADECC.1	U4/U6 small nuclear ribonucleoprotein PRP4
	1.5	Traes_7DL_D2EB7B8DF.1	E3 ubiquitin-protein ligase EL5
	2	Traes_3B_24278CD93.1	isoleucyl-tRNA synthetase
	1.8	Traes_3AL_5790EDDE7.2	mitochondrial import inner membrane translocase subunit TIM50
	2.5	Traes_6AS_A4F79095B.1	RNA polymerase I-specific transcription initiation factor RRN3
	1.5	Traes_5DS_BDE53BB5F.1	pumilio RNA-binding family
	0.8	Traes_7DS_619769289.1	centromeric protein E
	1.5	Traes_3AS_5875028F9.3	ATP-dependent RNA helicase DDX5/DBP2
	1.2	Traes_7DL_ACACA513D.2	transcriptional repressor NF-X1
	1.2	Traes_7DL_2F413CF0E.2	copper chaperone
	2.5	Traes_2BL_ED0C079ED.1	--
	1.5	Traes_7AS_7E99B3482.1	pathogenesis-related protein 1
	1.8	Traes_3AL_C9A8E6ED4.1	--
	1	Traes_2DS_F438957FE.1	leucine-rich PPR motif-containing protein, mitochondrial
	1	Traes_1DL_05B4AB2E3.1	caffeoylshikimate esterase
	2.2	Traes_3AL_20404D7E4.1	mitochondrial-processing peptidase subunit alpha
	2	Traes_2AL_79AD48080.1	heparan-alpha-glucosaminide N-acetyltransferase
	2.2	Traes_2BL_14B133AEB.1	fructose-bisphosphate aldolase, class I
	2	Traes_4DL_6FC6B26E7.2	guanylate kinase
	1.2	Traes_4BS_35F8C45F6.1	protein HIRA/HIR1
	2.5	Traes_5BS_7FF02D8B3.2	spastin
	2.5	Traes_2BS_5CDCD5152.1	--
	0.8	Traes_3B_A84ED9D40.1	nuclear transcription Y subunit beta
	1.2	Traes_2AS_537B3DF63.1	E3 ubiquitin-protein ligase RHA2
	1	Traes_4AL_1C6E2A6BF.1	ERO1-like protein alpha
	1.5	Traes_2AS_D5A07A9C6.1	hydroxypyruvate reductase 2
	2.5	Traes_5AS_68FB50ED1.2	spastin
	2	Traes_5BL_010E1E2A3.1	--
	1.8	Traes_2BS_48B2AB466.1	--
	1.8	Traes_2AS_45A0E50BF.1	serine/threonine-protein phosphatase 5
	0.8	Traes_6AL_686E9F639.1	magnesium/proton exchanger
	1	Traes_6BL_634758C90.1	MFS transporter, SP family, solute carrier family 2 (myo-inositol transporter), member 13
	2.5	Traes_2BL_9685774DE.1	mTERF domain-containing protein, mitochondrial
	0.8	Traes_6BL_A5A986E6C.1	26S proteasome regulatory subunit N7
miR1120b-3p	1.5	Traes_4AL_8E6C7B2EB.2	COMPASS component SWD3
	1.5	Traes_6BL_80A83E600.1	methionyl aminopeptidase
	2	Traes_7DL_74A27712F1.3	SET and MYND domain-containing protein
	1	Traes_2DL_1497E5611.2	--
	2	Traes_5BS_7C0EA9D4A.1	--
	1.2	Traes_3DL_858101A78.2	DNA-directed RNA polymerase III subunit RPC4
	1.8	Traes_3DS_561941A6E.1	steroid 3-oxidase
	1.8	Traes_6BL_A5A986E6C.1	26S proteasome regulatory subunit N7
	1.5	Traes_2DL_0E07C67BF.2	HtrA serine peptidase 2
	2	Traes_5DL_A061F2DD6.1	abnormal spindle-like microcephaly-associated protein
	1.8	Traes_7DL_EFB19C389.1	--
	2	Traes_5AL_C9E8B873B.1	histone-lysine N-methyltransferase SETD1
	1.5	Traes_6AS_79F735681.2	sister chromatid cohesion protein PDS5
	1.8	Traes_3AL_6E5BB3DDD.1	ubiquitin-conjugating enzyme E2 O
	1.5	Traes_4BL_CF3E56FCD.1	targeting protein for Xklp2
	1.8	Traes_5DS_2355C0256.1	solute carrier family 15 (peptide/histidine transporter), member 3/4
	2	Traes_4AS_4FDD11A23.1	G patch domain and KOW motifs-containing protein
	1	Traes_1BS_9FAA5E026.1	phospholipase D1/2
	1.8	Traes_4AS_049576319.2	cytochrome c oxidase assembly protein subunit 16
	1.5	Traes_2BL_E8D551BE0.2	--
	1	Traes_1AL_43F02DB49.1	dolichyl-diphosphooligosaccharide--protein glycosyltransferase
	2	Traes_3AS_CB2434231.1	--
	1.5	Traes_2AS_537B3DF63.1	E3 ubiquitin-protein ligase RHA2
	2	Traes_2DL_A22FE1F34.1	phosphatidylinositol glycan, class W
	2	Traes_1BS_4E905855D.1	small subunit ribosomal protein S3Ae
	2.2	Traes_6DL_05160A3F7.2	RING finger protein 170
	1.8	Traes_5AL_2D3FB375C.1	--
	1.5	Traes_2DS_1833BCFE3.1	elongation factor 1 alpha-like protein
	1.5	Traes_2DL_57283FFC8.1	--
	2	Traes_2DL_BCFBE0E93.2	alpha-amylase
	2	Traes_3AS_0E7CB4B4A.2	sentrin-specific protease 1
	2	Traes_5DL_AA17FD841.1	arsenite-transporting ATPase
	1	Traes_4BS_35F8C45F6.1	protein HIRA/HIR1
	1.5	Traes_5AL_35901C90B.1	fructokinase
	2.2	Traes_5AS_A977349961.2	F-box and leucine-rich repeat protein 2/20
	2.2	Traes_5DL_DFE47E78E.1	--
	2.2	Traes_2BS_F4DF1DB26.2	transcription elongation factor B, polypeptide 2
	2	Traes_6DS_8C1FC076E.1	U1 small nuclear ribonucleoprotein C
	1.8	Traes_4BL_A2081ED30.1	importin subunit beta-1
	1.8	Traes_2AL_EE1350B36.1	mTERF domain-containing protein, mitochondrial
	1.2	Traes_1AS_59404C639.1	--
	2	Traes_3DL_ABFE9D8D2.1	--
	1.8	Traes_6DL_36006E6FD.1	engulfment and cell motility protein 3
	0.5	Traes_4BL_65EF527FF.1	interleukin-1 receptor-associated kinase 1
	2.5	Traes_2BL_9AF083258.2	beta-1,4-mannosyl-glycoprotein beta-1,4-N-acetylglucosaminyltransferase
	1.5	Traes_6AL_3FB51E7F6.1	ATP-dependent Clp protease ATP-binding subunit ClpX
	1.8	Traes_3B_A84ED9D40.1	nuclear transcription Y subunit beta
	1.5	Traes_2AS_DACE53B24.2	(S)-2-hydroxy-acid oxidase
	2	Traes_6BL_C9B82742C.1	lysine-specific histone demethylase 1A
	2	Traes_1AL_6E5BA9C6F.1	light-harvesting complex II chlorophyll a/b binding protein 1
	2	Traes_6DL_7FA31D442.1	isocitrate dehydrogenase (NAD+)
	1	Traes_6AS_3AC3DD191.3	kelch-like protein 2/3
	1.2	Traes_3DL_838442186.1	U3 small nucleolar RNA-associated protein 11
	2.5	Traes_1AL_74B11DABD.1	--
	2.5	Traes_3AS_4AAF923CA.2	RNA polymerase II-associated factor 1
	1.8	Traes_6AL_686E9F639.1	magnesium/proton exchanger
	2	Traes_5DL_B3C8DD9AA.1	--
	1.8	Traes_4DS_1EBE1B4E4.1	--
	1.8	Traes_7AL_955F54182.1	KUP system potassium uptake protein
	1.8	Traes_7DS_619769289.1	centromeric protein E
	2.2	Traes_2DL_7511EDD3D.1	--
	2	Traes_1BL_E2E2ED3FE.1	DnaJ homolog subfamily C member 17
	2.5	Traes_7AL_EB9BE608A.2	para-aminobenzoate synthetase
	2.2	Traes_1DL_BA95A7496.1	uncharacterized protein
	2.5	Traes_2AL_AC3FC0869.1	ATP-dependent RNA helicase DDX21
	2	Traes_2DS_F438957FE.1	leucine-rich PPR motif-containing protein, mitochondrial
	1.5	Traes_6DS_8FBD67A01.1	--
	1.2	Traes_1DL_05B4AB2E3.1	caffeoylshikimate esterase
	2	Traes_6BL_634758C90.1	MFS transporter, SP family, solute carrier family 2 (myo-inositol transporter), member 13
	2	Traes_5DL_39377FD9E.1	interleukin-1 receptor-associated kinase 4
	1.5	Traes_4BL_AB3EBF1FD.2	--
	0.5	Traes_4AS_6C23CE2D6.1	nuclear cap-binding protein subunit 1
	2	Traes_5DL_0282E7F50.1	histone-lysine N-methyltransferase SETD1
	2	Traes_6DL_585DD5701.1	--
	1.5	Traes_5DL_A26DD6C4C.2	cytokinin trans-hydroxylase
	0.5	Traes_3AL_B0A5AA3FD.1	heart-and neural crest derivatives-expressed protein 2
	2	Traes_6BS_E9D7788BF.2	--
	1.5	Traes_2BS_EA4D55C79.1	elongation factor 1 alpha-like protein
	0	Traes_2BL_316434127.1	--
	2	Traes_3B_F3759BC02.1	interleukin-1 receptor-associated kinase 1
	1.5	Traes_5AS_9DC956868.2	molecular chaperone DnaJ
	0	Traes_6DS_ED2783EA5.1	interleukin-1 receptor-associated kinase 1
	2	Traes_7AL_FFC5B8676.1	--
	2	Traes_2BS_FBBD5645B.2	AMP deaminase
	2	Traes_2AL_13C5C3618.1	--
	1.5	Traes_3AS_865D5DF28.3	--
	2	Traes_2DS_C8CC2F963.1	ATP-dependent RNA helicase DDX21
	1.8	Traes_2DS_9BCFF2B80.1	--
	2.5	Traes_4DS_220628F6B.1	--
	1.8	Traes_3AS_5875028F9.3	ATP-dependent RNA helicase DDX5/DBP2
	1.8	Traes_1BS_0F6319D01.1	--
	2.2	Traes_7DL_2F413CF0E.2	copper chaperone
	1	Traes_1AS_801D9F0BC.1	beta-carotene isomerase
	1.5	Traes_2DL_DA1A74C0D.2	tRNA pseudouridine synthase 10
	2	Traes_5BL_769E8EB68.1	--
	2.5	Traes_2BL_BEF7320DE.1	ATP-dependent RNA helicase DDX21
	1.5	Traes_4DL_9562861FD.2	26S proteasome non-ATPase regulatory subunit 10
	1.8	Traes_6DL_5CB149734.2	abnormal spindle-like microcephaly-associated protein
	2	Traes_7DL_82C99049D.1	premnaspirodiene oxygenase
	2	Traes_6DL_F9179CEF0.1	--
	0.5	Traes_3AL_20404D7E4.1	mitochondrial-processing peptidase subunit alpha
	2	Traes_2DL_E26A9F576.1	3-hydroxyacyl-
	2.5	Traes_7BS_E02DEC947.1	large subunit ribosomal protein L41
	2	Traes_3AS_4A308DDAA.2	solute carrier family 10 (sodium/bile acid cotransporter), member 7
	2	Traes_7DS_EDF8525AA.2	aarF domain-containing kinase
	2.2	Traes_4AL_B71EDEEF5.1	4-hydroxyphenylacetaldehyde oxime monooxygenase
	2.5	Traes_5AL_9C9E55228.2	cellulose synthase A
	2	Traes_2AL_A711DF57E1.1	3-hydroxyacyl-
	2.5	Traes_4AL_E6BE2683D.1	ubiquinone biosynthesis monooxygenase Coq6
	2.5	Traes_7BL_1EF051BA2.1	exocyst complex component 7
	1	Traes_2DS_D014BDCA2.1	pectinesterase
	2	Traes_5AL_2C26B1FFC.1	E3 ubiquitin-protein ligase RNF38/44
	2.5	Traes_1BS_D81E948D7.1	histone acetyltransferase
	1.8	Traes_5DL_6E81BE289.2	aquaporin TIP
	2	Traes_4AS_749EC4A61.1	HSP20 family protein
	1.5	Traes_3DS_2D56E83A6.1	cholestenol delta-isomerase
	2	Traes_1BL_75E330BC7.1	--
	2.2	Traes_4AL_A99729A05.2	FUS-interacting serine-arginine-rich protein 1
	2.5	Traes_7BS_B9DB93736.1	protein O-mannose beta-1,4-N-acetylglucosaminyltransferase
	2	Traes_7AL_96383AEEC.1	glucuronoxylan 4-O-methyltransferase
	2	Traes_7AS_F38BE6DA7.1	signal recognition particle receptor subunit beta
	2	Traes_6BS_F87437638.3	--
	1.5	Traes_5BL_45662533A.1	--
	1.5	Traes_5AL_FC94B5FB6.1	methionine S-methyltransferase
	2	Traes_1DL_66B426FE4.2	homeobox protein Meis1
	2.5	Traes_6BS_19006D7F7.1	red chlorophyll catabolite reductase
	2	Traes_5DL_8FBC01EB0.1	--
	2.2	Traes_7DL_ACACA513D.2	transcriptional repressor NF-X1
	2	Traes_5DL_8C9E4AEE1.1	--
	1.5	Traes_6DL_F2CADEFF6.1	E3 ubiquitin-protein ligase RNF38/44
	2.5	Traes_3DL_8CF059E3E.1	myo-inositol-1(or 4)-monophosphatase
	1.8	Traes_1DL_9FE4D295D.2	--
	2.5	Traes_4DL_E82C52D46.1	phosphatidylserine decarboxylase
	0.5	Traes_7DL_DE178FDB4.1	tetraspanin-5
	1.2	Traes_1AL_88C4E33E6.1	LRR receptor-like serine/threonine-protein kinase EFR
	2	Traes_7DS_CAB1BF6AC.1	--
	2	Traes_3AL_06C899E49.1	5'-AMP-activated protein kinase, catalytic alpha subunit
	1.8	Traes_5BL_9010C082A.1	hydroquinone glucosyltransferase
	2	Traes_5BL_756B1DFCF.7	5'-AMP-activated protein kinase, catalytic alpha subunit
	2	Traes_4AL_1C6E2A6BF.1	ERO1-like protein alpha
	2.5	Traes_1DL_84C15D335.1	light-harvesting complex II chlorophyll a/b binding protein 1
	2	Traes_4AS_EECF41BA4.2	--
	2	Traes_7BL_8F226AC0C.1	riboflavin kinase
miR1122b-3p	0.5	Traes_1AL_AC6219D99.1	KUP system potassium uptake protein
	1.8	Traes_3B_A117F9E1E.1	pentatricopeptide repeat domain-containing protein 1
	1	Traes_4DL_558B56820.2	large subunit ribosomal protein L40e
	1.8	Traes_5AL_93DE9A816.1	immunoglobulin-binding protein 1
	1	Traes_3DL_3C4B39193.1	--
	2	Traes_6DL_4EB3C5C2E1.1	stromal membrane-associated protein
	0	Traes_3DS_D42FCD586.2	fructose-bisphosphate aldolase, class I
	1.8	Traes_1BL_75E330BC7.1	--
	1	Traes_1AL_AE0622D50.1	6-phosphofructokinase 1
	2.5	Traes_2BL_E5D1E69D1.2	large subunit ribosomal protein L5e
	2	Traes_4DL_5C1264C81.2	poly(rC)-binding protein 2/3/4
	2	Traes_6DL_4EB3C5C2E.1	stromal membrane-associated protein
	1	Traes_2AL_D2CC35E59.2	protein phosphatase methylesterase 1
	0	Traes_4DL_CC7FC2CE3.1	leucine-rich PPR motif-containing protein, mitochondrial
	1	Traes_1AL_723984393.1	--
	0	Traes_3AL_E7124368C.2	--
	1.5	Traes_6DL_35440CF53.1	NADH-ubiquinone oxidoreductase chain 3
	2	Traes_6DL_DC6AA66E7.1	--
	0.5	Traes_6DL_7AE5749B8.2	methylglutaconyl-CoA hydratase
	1.2	Traes_5DL_C9385EE59.1	--
	2.2	Traes_5BL_F7E42DB3E.1	origin recognition complex subunit 1
	0.5	Traes_5BL_A00DBEB11.1	casein kinase 1, delta
	1.5	Traes_1BL_19E99972B.1	mTERF domain-containing protein, mitochondrial
	2	Traes_4BS_749EEDDB6.1	interleukin-1 receptor-associated kinase 4
	1.8	Traes_4AS_4FDD11A23.1	G patch domain and KOW motifs-containing protein
	1.8	Traes_6AL_166BD3BEC.1	tRNA pseudouridine38-40 synthase
	2.5	Traes_1DS_FB5D75ECD.1	disease resistance protein RPM1
	2	Traes_4DL_958E677DF.1	sulfoquinovosyltransferase
	2	Traes_4AL_15A19D331.2	ATP-dependent DNA helicase HFM1/MER3
	1	Traes_6DS_0D9BB546D.1	probable phosphoglycerate mutase
	1.5	Traes_1DS_7868656E4.1	interleukin-1 receptor-associated kinase 4
	2	Traes_1DL_BA95A7496.1	uncharacterized protein
	0	Traes_5DS_A6AE32DCD.2	phenylalanyl-tRNA synthetase beta chain
	0	Traes_2DL_0C6C7C3A6.1	--
	0.5	Traes_6BS_3013D3E79.2	histone deacetylase 1/2
	1	Traes_5AS_46DF79652.2	stress-induced-phosphoprotein 1
	0	Traes_4AL_954AE4933.1	beta-galactosidase
	1.8	Traes_5BL_7D80800A8.1	pyruvate dehydrogenase phosphatase
	0.5	Traes_4DL_323E0E63C.1	NADH dehydrogenase (ubiquinone) 1 beta subcomplex subunit 7
	0.8	Traes_4AL_4690A5BB7.1	glycyl-tRNA synthetase
	0.5	Traes_4BL_9A3730016.1	--
	1	Traes_3AL_F646B87051.1	leucine-rich PPR motif-containing protein, mitochondrial
	0	Traes_4DL_455113C391.1	isoleucyl-tRNA synthetase
	1.8	Traes_5DL_AA17FD841.1	arsenite-transporting ATPase
	0.5	Traes_3B_5DD9C1BE5.1	--
	0	Traes_6AS_097C39C01.2	DNA damage-inducible protein 1
	1.8	Traes_6DL_7FA31D442.1	isocitrate dehydrogenase (NAD+)
miR1127a	2.5	Traes_5BL_FB94A02FE.1	ribosomal RNA-processing protein 12
	2	Traes_3DS_8C54D3113.1	--
	1	Traes_4AS_9B8749CEB.2	ribonucleases P/MRP protein subunit RPP25
	0	Traes_6BS_8EB9E6EC7.2	disease resistance protein RPM1
	2	Traes_4DS_4A218CF36.1	interleukin-1 receptor-associated kinase 1
	2.5	Traes_1BL_CEA2C6FB3.1	MFS transporter, PHS family, inorganic phosphate transporter
	1.8	Traes_3AS_7C8563F80.1	transcription factor IIIB 90 kDa subunit
	2.5	Traes_2AL_3384AED5F.1	signal peptidase complex subunit 2
	2.5	Traes_7DS_016F8E2EA.1	zinc finger SWIM domain-containing protein 3
	2.5	Traes_2DL_600A952E5.1	isopentenyl-diphosphate delta-isomerase
	2	Traes_7BL_625F55A12.1	--
	2.5	Traes_6BL_414885850.1	26S proteasome regulatory subunit N6
	1	Traes_5BS_AE8F8B4E8.1	--
	2.2	Traes_2BS_779075872.1	26-hydroxylase
	0.5	Traes_3DS_C894F7EF1.1	Ras-related protein Rab-1A
	2.5	Traes_5DL_7A6519141.1	ribosomal RNA-processing protein 12
	1	Traes_3AS_086BAC20B.2	ribonuclease III family protein
	0	Traes_5AL_2D51123F6.1	--
	2.5	Traes_6DS_3A1EA267A.17	mTERF domain-containing protein, mitochondrial
	2	Traes_4BS_D3F4E15A0.3	--
	2.2	Traes_2BL_8FED05903.1	transcription factor MYC2
	1.5	Traes_2AL_BDB97A5BA.1	9-cis-epoxycarotenoid dioxygenase
	2.5	Traes_2BL_40442CE82.1	cofilin
	2.5	Traes_3AL_82BE18699.2	E3 ubiquitin-protein ligase BRE1
	0	Traes_4BL_379DA1919.1	threonine aldolase
	1.5	Traes_4AL_824C5E0F6.2	--
	1.5	Traes_5BL_245A319AD.1	--
	2	Traes_5AL_FB8A3A1BB.2	--
	1.5	Traes_4AL_0CBF57B3F.1	poly(rC)-binding protein 2/3/4
	1.8	Traes_5DL_F2EB5A102.1	palmitoyltransferase ZDHHC9/14/18
	2	Traes_5BL_847F410C2.2	rhamnogalacturonan II specific xylosyltransferase
	2.5	Traes_2DL_622F4AD96.2	malate dehydrogenase (NADP+)
	2.2	Traes_1AS_6C2BED457.1	--
	1.5	Traes_2AS_5A5258192.1	acetyl-CoA carboxylase / biotin carboxylase 1
	2.5	Traes_2BS_8B6A1183D.1	interleukin-1 receptor-associated kinase 4
	1.2	Traes_1BL_32F5519AA.1	--
	1	Traes_1AL_B60132B5A.2	speckle-type POZ protein
	2	Traes_5BL_F7FF5F98C.2	--
	2.5	Traes_1AL_4A458DF14.1	leucine-rich PPR motif-containing protein, mitochondrial
	2	Traes_2AL_24A1BF00C.1	cold-inducible RNA-binding protein
	2.5	Traes_6DL_26DCE0489.2	E3 ubiquitin-protein ligase SIAH1
	2	Traes_3AS_8E92B074B.2	ATP-dependent RNA helicase DHX36
	1.8	Traes_5DL_0D8BB1DD6.1	ATP-dependent DNA helicase 2 subunit 2
	0	Traes_2DS_BCB7C3C11.1	mTERF domain-containing protein, mitochondrial
	2	Traes_4AS_2C1FF4C5D.1	--
	1.5	Traes_1BS_9FDB4C9EC.1	DnaJ homolog subfamily B member 11
	0.5	Traes_4AS_144A4BFD1.1	replication factor A1
	2.5	Traes_7AS_61114500F.1	alpha-1,4-galacturonosyltransferase
	2	Traes_3DL_D9A29948B.2	myb proto-oncogene protein, plant
	0	Traes_4DL_253F18B56.1	HSP20 family protein
	2.5	Traes_7BL_DD8F7FB3D.1	interleukin-1 receptor-associated kinase 4
	1.5	Traes_7BL_56B80DB6F.1	meiotic recombination protein SPO11
	2	Traes_5AL_6946D4AF8.3	interleukin-1 receptor-associated kinase 1
	1	Traes_1AL_3F65EE35A.1	tetraspanin-5
	2	Traes_4AL_19C21724F.2	--
	2	Traes_7BL_A7BC41079.1	--
	1	Traes_5DL_F75860E0B.1	cell division protease FtsH
	2	Traes_2AS_A98A48472.2	--
	2.5	Traes_2AL_965DE57EB.1	--
	1.5	Traes_4BS_2767E4D9C.1	DIS3-like exonuclease 1
	2.2	Traes_2BL_A60E22001.2	palmitoyltransferase
	1.8	Traes_5AL_863680C31.1	linoleate 9S-lipoxygenase
	0.5	Traes_1AS_675F5F1DC.2	pto-interacting protein 1
	2	Traes_3AL_656A1BF05.1	nitrogen fixation protein NifU and related proteins
	2.5	Traes_7DS_A32326691.1	type II pantothenate kinase
	2	Traes_1DS_35954E987.1	ethylene receptor
	2.5	Traes_5BS_B1780FD5B.1	RNA 3'-terminal phosphate cyclase-like protein
	1.8	Traes_2BS_EE62A3C6C.1	large subunit ribosomal protein L28
	1.5	Traes_1AL_B6F713FA8.1	kinesin family member C2/C3
	2.5	Traes_7BL_A7120C76A.1	monodehydroascorbate reductase (NADH)
	1.5	Traes_6BL_F24527DB6.1	centromeric protein E
	2	Traes_5AL_9B37C7CDB.2	phosphatidylinositol phospholipase C, delta
	1	Traes_2BS_4914C7128.1	--
	1.5	Traes_4BL_1BBF712A1.1	pyruvate kinase
	0	Traes_1AS_7AB089C23.1	--
	2	Traes_6BL_304092BEE.1	callose synthase
	2.5	Traes_2AL_3351A5CEC.1	--
	1.5	Traes_2AS_06B305ADA.1	zeta-carotene desaturase
miR1127b-3p	0.5	Traes_6BL_BEA7F3D35.2	chaperonin GroES
	1.8	Traes_4BS_02C5D7625.1	small subunit ribosomal protein S16e
	1	Traes_4AS_2C1FF4C5D.1	--
	1	Traes_2DS_4C54B598A.1	gibberellin receptor GID1
	2	Traes_1AL_1EB3BBACE.2	transcription elongation factor SPT5
	2.5	Traes_5AL_898DAA873.1	H+-transporting ATPase
	2.2	Traes_1BS_406EE2272.1	heat shock 70kDa protein 1/8
	1.2	Traes_5AL_96E30FD9B.1	acetyl-CoA C-acetyltransferase
	1.5	Traes_3AL_7F0DD95F8.2	GTP-binding protein
	2	Traes_6BS_359806358.4	leucine-rich repeat protein SHOC2
	2	Traes_6AS_5F9380E0C.1	ATP-dependent RNA helicase MSS116, mitochondrial
	1	Traes_2BS_A2AC8AAE5.1	--
	2	Traes_3AL_B9BFFB6CE.1	--
	1.5	TRAES3BF065400200CFD_t1	--
	2	Traes_7AL_8C73DEC63.1	magnesium/proton exchanger
	2.5	Traes_6BS_B25CB3CE0.1	pyruvate dehydrogenase phosphatase
	1.5	Traes_1BL_32F5519AA.1	--
	1.5	Traes_7BL_97ADB0D8A.1	3-ketoacyl-CoA synthase
	0	Traes_3AL_CF48B3F4A.1	NADH:ubiquinone reductase (non-electrogenic)
	1.2	Traes_5BL_5E94C243F.2	kinetochore protein NDC80
	0	Traes_5AL_83CEC08B6.3	disease resistance protein RPM1
	0.5	Traes_2DL_36DD958E1.1	mitochondrial chaperone BCS1
	2	Traes_1AL_12123508E.2	E3 ubiquitin-protein ligase SIAH1
	1	Traes_5BL_0A9B605FB.1	alkylated DNA repair protein alkB homolog 1
	1	Traes_6BL_066E7881C.1	nucleolysin TIA-1/TIAR
	1.2	Traes_3AL_4A93BA5FF.1	myosin V
	1	Traes_5AL_E5FB83F56.1	BR-signaling kinase
	2	Traes_4DL_8C572B927.1	E3 ubiquitin-protein ligase RNF115/126
	1	Traes_7AS_A509F2FD1.1	translation initiation factor 2D
	2	Traes_7AS_B77C9DE4D.1	4,4-dimethyl-9beta,19-cyclopropylsterol-4alpha-methyl oxidase
	2	Traes_3AS_B6A286A65.2	integrator complex subunit 7
	1.2	Traes_2DS_82116F38F.1	p70 ribosomal S6 kinase
	1.5	Traes_4BS_718B422BF.2	cysteine synthase A
	0	Traes_1AL_4A458DF14.1	leucine-rich PPR motif-containing protein, mitochondrial
	0.2	Traes_2BL_40442CE82.1	cofilin
	1.5	Traes_1BS_24FC582AD.1	2,4-dihydroxy-1,4-benzoxazin-3-one-glucoside dioxygenase
	0	Traes_5BL_245A319AD.1	--
	1.5	Traes_6AS_F18C49565.1	far upstream element-binding protein
	2.5	Traes_1DS_51BD5E17A.1	--
	1.5	Traes_1AS_6C2BED457.1	--
	2.2	Traes_2BL_D12DCF896.2	--
	2.5	Traes_1BS_44FD05188.2	WNK lysine deficient protein kinase
	2.2	Traes_1DL_198A02950.1	flavonol synthase
	1	Traes_1BS_1899E4F50.1	--
	1.5	Traes_4AS_4F615C5CC.2	homeobox protein Meis2
	2.5	Traes_1DS_F3F17A72C.1	WNK lysine deficient protein kinase
	1.5	Traes_2DS_BCB7C3C11.1	mTERF domain-containing protein, mitochondrial
	1	Traes_5AL_00CD65EAA.1	phosphatidylinositol phospholipase C, delta
	1.5	Traes_7DL_DA620801B.1	signal peptide peptidase-like 2B
	2	Traes_7AS_AFF4CD34F.1	--
	2.5	Traes_1AS_6E755F062.2	WNK lysine deficient protein kinase
	2	Traes_5BL_9FE55989B.1	multidrug resistance protein, MATE family
	1.5	Traes_4AL_74A0F59A6.1	--
miR1128	1.8	Traes_2AL_24A1BF00C.1	cold-inducible RNA-binding protein
	2	Traes_5BL_43BC70A681.2	--
	2.2	Traes_4BL_B5A5FB2EB.2	tyrosyl-DNA phosphodiesterase 2
	1.8	Traes_7AS_61114500F.1	alpha-1,4-galacturonosyltransferase
	1.5	Traes_4DL_CD9F2C6A5.1	mitochondrial ABC transporter ATM
	1.2	Traes_6BL_462C2179A.1	tripeptidyl-peptidase II
	1.8	Traes_2AS_6BF19AB61.1	beta-galactoside alpha-2,3-sialyltransferase (sialyltransferase 4A)
	1.8	Traes_7BS_3248E4560.1	hyperpolarization activated cyclic nucleotide-gated potassium channel 4
	1.2	Traes_7AS_D0A89CDD4.1	--
	1	Traes_3DL_71B7E80D2.1	protein phosphatase 2C
	2	Traes_2BL_F0E4D42E0.2	mitochondrial chaperone BCS1
	2	Traes_5DL_A95A73FFE.2	transcription factor IIIB 90 kDa subunit
	2	Traes_3AS_D23A03DFB.1	--
	1.2	Traes_5DL_F2EB5A102.1	palmitoyltransferase ZDHHC9/14/18
	2.5	Traes_4BS_90B7D3855.1	1,2-diacylglycerol 3-beta-galactosyltransferase
	2	Traes_7DS_BE27347B1.1	protein O-mannose beta-1,4-N-acetylglucosaminyltransferase
	1.5	Traes_5BL_B07A81170.1	diphthamide biosynthesis protein 3
	0.5	Traes_3DL_325A49FCC.1	ATP-binding cassette, subfamily B (MDR/TAP), member 1
	1.5	Traes_1DL_99A04DF9C.2	--
	1.8	Traes_3AL_656A1BF05.1	nitrogen fixation protein NifU and related proteins
	1	Traes_7AL_076CFDA60.1	nitrate reductase (NAD(P)H)
	2	Traes_2AL_463692D9F.1	mitochondrial chaperone BCS1
	1	Traes_3AL_77C1A835E.2	CTD small phosphatase-like protein 2
	2	Traes_3DL_838442186.1	U3 small nucleolar RNA-associated protein 11
	1.5	Traes_5BL_02DC01B97.1	--
	1.8	Traes_4BL_165838228.1	solute carrier family 32 (vesicular inhibitory amino acid transporter)
	2	Traes_2DS_9520F146E.1	L-ascorbate oxidase
	2	Traes_6BL_F8C4F363B.1	--
	2	Traes_7DL_D2EB7B8DF.1	E3 ubiquitin-protein ligase EL5
	2	Traes_7BS_941D0F9E7.1	--
	1.8	Traes_6BL_A5A986E6C.1	26S proteasome regulatory subunit N7
	1.5	Traes_7AL_FD64090E6.1	spastin
miR1130	1.2	Traes_4AS_61EEDA259.1	tyrosyl-DNA phosphodiesterase 2
	1.2	Traes_5DS_19FC85E95.2	pentatricopeptide repeat domain-containing protein 1
	1	Traes_2BS_10BA374E6.2	--
	1.2	Traes_5AL_3777CEE34.2	protein SMG7
	0.5	Traes_3DL_3E745BC0B.1	xylogalacturonan beta-1,3-xylosyltransferase
	1.2	Traes_1DL_32721686A.1	DNA primase small subunit
	1.2	Traes_1BL_CDB5E50C2.1	--
	0.8	Traes_1AL_FAA0547B8.2	disease resistance protein RPS2
	2.2	Traes_2BS_EAEF7762A.2	regulator of chromosome condensation
	1.2	Traes_4DL_0E34DFAA4.1	novel plant SNARE
	1.8	Traes_4DL_075CEB82F.1	--
	1.8	Traes_3AL_8149FBF37.1	--
	1.2	Traes_6DS_3D7B84816.1	--
	1.2	Traes_1AL_E0773EAEA.1	DNA primase small subunit
	0.8	Traes_1DL_031002494.2	palmitoyltransferase
	1	Traes_4BS_EF7E4C2CF.1	replication factor A1
	1.8	Traes_2AS_FA2D64C88.2	regulator of chromosome condensation
	1.2	Traes_1BL_5390D3FF8.2	leucine-rich repeat protein SHOC2
	1.2	Traes_6AL_BEC4260EC.3	F-box and leucine-rich repeat protein 2/20
	2	Traes_2DS_5DF921ABB.1	pyruvate dehydrogenase E1 component beta subunit
	1.8	Traes_2AL_6C08D8E87.2	--
	0.8	Traes_5AL_F31F6E9EA.1	structure-specific endonuclease subunit SLX1
	1.2	Traes_7BL_4924E1631.2	--
	1	Traes_1AS_DB3082568.1	pto-interacting protein 1
	1.8	Traes_5AL_CD9481C81.1	protein phosphatase
	0.8	Traes_4BL_75E9A2812.1	--
	1.2	Traes_2DS_288F245C1.1	regulator of chromosome condensation
	0.5	Traes_2DL_12965A54A.3	callose synthase
	1.2	Traes_6AS_EB590F732.1	ATP-binding cassette, subfamily G (WHITE), member 2
	1.2	Traes_1DL_DCF692451.1	--
	1.2	Traes_6BL_104A721EF.1	F-box and leucine-rich repeat protein 2/20
	0.8	Traes_7DS_6DE6AC856.2	ankyrin repeat and BTB/POZ domain-containing protein 1
	1.8	Traes_2DS_83CDF63AC.1	5'-AMP-activated protein kinase, regulatory beta subunit
	1.8	Traes_2AL_09E55387E.1	interleukin-1 receptor-associated kinase 4
	1.2	Traes_3AL_838AB2D97.1	xylogalacturonan beta-1,3-xylosyltransferase
	1.8	Traes_3DL_299DCEB86.2	coatomer, subunit beta'
	1.2	Traes_4DL_7ADC14F38.2	interleukin-1 receptor-associated kinase 4
	1.5	Traes_3AL_C9E8581FC.1	--
miR1130b-3p	2	Traes_3AS_CB2434231.1	--
	0.5	Traes_1BS_D81E948D7.1	histone acetyltransferase
	0.8	Traes_1AL_88C4E33E6.1	LRR receptor-like serine/threonine-protein kinase EFR
	2.5	Traes_4AL_CDC2424AB.2	cyanohydrin beta-glucosyltransferase
	1.2	Traes_6AL_D85750CB6.2	vacuolar protein sorting-associated protein 45
	0.2	Traes_4AL_1C6E2A6BF.1	ERO1-like protein alpha
	0.8	Traes_2AS_537B3DF63.1	E3 ubiquitin-protein ligase RHA2
	2	Traes_5AL_670A84226.3	--
	0	Traes_4AS_049576319.2	cytochrome c oxidase assembly protein subunit 16
	1.8	Traes_6BL_9E43B8FCD.1	--
	2	Traes_2AS_CBB2430AD.1	--
	2	Traes_2BS_FBBD5645B.2	AMP deaminase
	1.2	Traes_2BL_14B133AEB.1	fructose-bisphosphate aldolase, class I
	0.5	Traes_7DS_CAB1BF6AC.1	--
	2.5	Traes_2BL_09184B677.2	TatD DNase family protein
	0.2	Traes_1DL_F9213AB33.1	KDEL-tailed cysteine endopeptidase
	2	Traes_4BS_1BAD49C4E.2	splicing factor U2AF 65 kDa subunit
	0.5	Traes_3DL_858101A78.2	DNA-directed RNA polymerase III subunit RPC4
	2	Traes_5DL_8FBC01EB0.1	--
	0.8	Traes_5DS_BDE53BB5F.1	pumilio RNA-binding family
	1.5	Traes_3AS_137C2C208.3	--
	0.5	Traes_5BL_45662533A.1	--
	1.2	Traes_3AL_20BAF937E.2	--
	0	Traes_4BL_CF3E56FCD.1	targeting protein for Xklp2
	2.2	Traes_4DL_1D4A338DE.1	UDP-glucuronate decarboxylase
	2	Traes_7AL_2C31E1078.1	disease resistance protein RPM1
	1.5	Traes_2AS_D38A5E045.1	amidase
	0	Traes_2AL_EE1350B36.1	mTERF domain-containing protein, mitochondrial
	1.5	Traes_6BS_812D3A692.1	mTERF domain-containing protein, mitochondrial
	0.8	Traes_7AS_45F0BB787.2	--
	1.5	Traes_6BS_FDDC181D1.1	20S proteasome subunit alpha 6
	2.5	Traes_5AL_FC94B5FB6.1	methionine S-methyltransferase
	1	Traes_6DL_36006E6FD.1	engulfment and cell motility protein 3
	2.5	Traes_1AL_FA4A9FA74.1	gelsolin
	1.5	Traes_2BL_316434127.1	--
	1.5	Traes_4BL_5AF7ACF03.2	--
	1	Traes_6BS_CBD931158.4	mTERF domain-containing protein, mitochondrial
	1.8	Traes_1DL_BDDCF33B3.1	--
	1.5	Traes_3AL_20404D7E4.1	mitochondrial-processing peptidase subunit alpha
	1.5	Traes_7DS_CA0DAA41B.1	GTP-binding protein LepA
	0.5	Traes_7DL_C1366F921.1	pentatricopeptide repeat domain-containing protein 1
	0.5	Traes_6AL_3FB51E7F6.1	ATP-dependent Clp protease ATP-binding subunit ClpX
	0.5	Traes_6AS_7B38D5B47.2	myo-inositol-1(or 4)-monophosphatase
	0	Traes_7AL_955F54182.1	KUP system potassium uptake protein
	1	Traes_4DL_6FC6B26E7.2	guanylate kinase
	1	Traes_5BL_9010C082A.1	hydroquinone glucosyltransferase
	2	Traes_6AS_7F461605A.1	--
	0	Traes_2DS_9BCFF2B80.1	--
	0	Traes_6DL_5CB149734.2	abnormal spindle-like microcephaly-associated protein
	0.5	Traes_7AL_FFC5B8676.1	--
	0.5	Traes_5DL_F243512BC.2	--
	2	Traes_5DL_432CC0CB0.1	electron transfer flavoprotein alpha subunit
	1	Traes_2DS_D014BDCA2.1	pectinesterase
	2	Traes_6DS_8C1FC076E.1	U1 small nuclear ribonucleoprotein C
	1.2	Traes_3AS_0E7CB4B4A.2	sentrin-specific protease 1
	2.5	Traes_4AS_EECF41BA4.2	--
	1.2	Traes_2BS_48B2AB466.1	--
	1.5	Traes_3AL_C0D1C4403.1	malate dehydrogenase (oxaloacetate-decarboxylating)(NADP+)
	1	Traes_4BL_65EF527FF.1	interleukin-1 receptor-associated kinase 1
	2.2	Traes_6AL_A93C6F2FC.1	MADS-box transcription factor, plant
	1.5	Traes_2AL_79AD48080.1	heparan-alpha-glucosaminide N-acetyltransferase
	1.5	Traes_7DL_73928596C.1	14-3-3 protein epsilon
	0	Traes_2DS_C8CC2F963.1	ATP-dependent RNA helicase DDX21
	2	Traes_5DL_382806161.1	homeobox-leucine zipper protein
	2.5	Traes_2AL_62160B4F7.2	alpha-amylase
	2.5	Traes_2BL_9AF083258.2	beta-1,4-mannosyl-glycoprotein beta-1,4-N-acetylglucosaminyltransferase
	2	Traes_2BL_2657EE5E2.1	protein phosphatase 1L
	2.2	Traes_2BL_07C9811CB.1	--
	2.2	Traes_2BL_9685774DE.1	mTERF domain-containing protein, mitochondrial
	1.2	Traes_6AS_912DA59AA.1	probable phosphoglycerate mutase
	2.5	Traes_4BS_105DAA77B.1	glycerol-3-phosphate acyltransferase
	1.5	Traes_5AL_1311205EE.2	sacsin
	1.5	Traes_6AS_332F30482.1	V-type H+-transporting ATPase subunit D
	1	Traes_2DL_BCFBE0E93.2	alpha-amylase
	0.5	Traes_6BL_F03DF2949.2	signal peptide peptidase-like 2B
	0.8	Traes_6DS_1B409CE95.1	callose synthase
	2.2	Traes_5DL_16264667A.1	UDP-glucose:(indol-3-yl)acetate beta-D-glucosyltransferase
	1.8	Traes_2BS_F4DF1DB26.2	transcription elongation factor B, polypeptide 2
	2.5	Traes_3DL_D13566621.1	polyneuridine-aldehyde esterase
	2	Traes_3AL_DDBCC6696.2	solute carrier family 15 (peptide/histidine transporter), member 3/4
	0.5	Traes_7DL_ACACA513D.2	transcriptional repressor NF-X1
	0.5	Traes_4AS_CBEEADECC.1	U4/U6 small nuclear ribonucleoprotein PRP4
	0	Traes_1DL_9FE4D295D.2	--
	2	Traes_4AL_4B7E7B1AA.1	E3 ubiquitin-protein ligase RNF38/44
	1.5	Traes_4BS_959C97F4F.1	--
	2.2	Traes_1DL_547D8DAC2.1	MFS transporter, SP family, solute carrier family 2 (myo-inositol transporter), member 13
	0.5	Traes_3DL_838442186.1	U3 small nucleolar RNA-associated protein 11
	1.5	Traes_4BL_6CBFA2771.1	translation initiation factor 2 subunit 1
	0.5	Traes_7DL_D2EB7B8DF.1	E3 ubiquitin-protein ligase EL5
	2	Traes_1BS_D62813EDF.1	tricin synthase
	1.5	Traes_5AL_3976F401A.1	--
	2	Traes_1DL_47D137A08.1	1-phosphatidylinositol-4-phosphate 5-kinase
	1.5	Traes_6BS_D8B7C37B0.2	mTERF domain-containing protein, mitochondrial
	2	Traes_1AL_1A1E3798D.1	--
	1.2	Traes_2BS_A87D49831.1	pyruvate dehydrogenase kinase 2/3/4
	1.5	Traes_2DS_69E67704C.2	pyruvate dehydrogenase kinase 2/3/4
	0.5	Traes_2DL_3D4B9145A.1	--
	2	Traes_2AS_B2BD6AD3C.2	leucine-rich PPR motif-containing protein, mitochondrial
	1.5	Traes_4DS_E3FF7A34C.1	cystatin-C
	1.5	Traes_6AS_A4F79095B.1	RNA polymerase I-specific transcription initiation factor RRN3
	1	Traes_1BL_7C8FD5930.1	interleukin-1 receptor-associated kinase 4
	0.5	Traes_7DL_82C99049D.1	premnaspirodiene oxygenase
	0	Traes_5DL_B3C8DD9AA.1	--
	2.5	Traes_4DS_220628F6B.1	--
	1.5	Traes_5AS_68FB50ED1.2	spastin
	1.2	Traes_3B_24278CD93.1	isoleucyl-tRNA synthetase
	2	Traes_6DS_ED2783EA5.1	interleukin-1 receptor-associated kinase 1
	2	Traes_1BS_9FAA5E026.1	phospholipase D1/2
	2.5	Traes_7DS_5A117F2B1.2	achilleol B synthase
	1.2	Traes_2BL_C963272C8.1	sucrose synthase
	0	Traes_6BL_A5A986E6C.1	26S proteasome regulatory subunit N7
	1.5	Traes_2BS_EA4D55C79.1	elongation factor 1 alpha-like protein
	1	Traes_5BS_7C0EA9D4A.1	--
	1	Traes_5AL_2C26B1FFC.1	E3 ubiquitin-protein ligase RNF38/44
	0.5	Traes_1AS_59404C639.1	--
	0.5	Traes_5DL_DFE47E78E.1	--
	1.5	Traes_5BL_AA72FE5C0.1	--
	0.5	Traes_7AS_7E99B3482.1	pathogenesis-related protein 1
	0	Traes_6AL_686E9F639.1	magnesium/proton exchanger
	1.5	Traes_4DS_990D31BB1.6	elongation factor 1-alpha
	1	Traes_4BL_A2081ED30.1	importin subunit beta-1
	2.5	Traes_5AL_9C9E55228.2	cellulose synthase A
	1	Traes_2DL_1497E5611.2	--
	2.5	Traes_4BS_15660A515.1	--
	2.5	Traes_2DL_DA1A74C0D.2	tRNA pseudouridine synthase 10
	1	Traes_4BL_65AB61144.1	UDP-glucuronate decarboxylase
	0.5	Traes_2DL_5750F91AA.1	U4/U6.U5 tri-snRNP-associated protein 1
	2	Traes_2DS_198CE54FE.1	splicing factor, arginine/serine-rich 17
	1.2	Traes_5AS_A977349961.2	F-box and leucine-rich repeat protein 2/20
	1	Traes_3AL_5790EDDE7.2	mitochondrial import inner membrane translocase subunit TIM50
	1.8	Traes_1DS_0CFC1995D.2	transcription factor TGA
	2	Traes_2BS_71A601005.2	amino-acid N-acetyltransferase
	1.5	Traes_4DL_7C8234BD1.1	4-hydroxy-tetrahydrodipicolinate reductase
	1	Traes_7AS_F38BE6DA7.1	signal recognition particle receptor subunit beta
	2.5	Traes_2BL_BEF7320DE.1	ATP-dependent RNA helicase DDX21
	0	Traes_6BS_F87437638.3	--
	2.2	Traes_3B_F66658675.1	interleukin-1 receptor-associated kinase 4
	1.5	Traes_6DL_A95013422.2	sn1-specific diacylglycerol lipase
	2	Traes_3AL_B0A5AA3FD.1	heart-and neural crest derivatives-expressed protein 2
	0.5	Traes_5AL_6A1F041A8.1	UDP-glucose:(indol-3-yl)acetate beta-D-glucosyltransferase
	2	Traes_1BL_E2E2ED3FE.1	DnaJ homolog subfamily C member 17
	1.5	Traes_2BL_A59C00F48.1	--
	1	Traes_3AS_993B34F61.1	--
	1.2	Traes_7DL_85A6FC0F2.1	--
	1.5	Traes_1AL_7FE24229E.2	protein KRI1
	2	Traes_5BL_FD504C45C.1	uncharacterized protein
	2	Traes_2DS_CDD18305B.1	--
	2.5	Traes_4AL_8E6C7B2EB.2	COMPASS component SWD3
	2	Traes_6AS_3AC3DD191.3	kelch-like protein 2/3
	0	Traes_2DS_F438957FE.1	leucine-rich PPR motif-containing protein, mitochondrial
	2	Traes_1AL_6B108514B.1	MADS-box transcription factor, plant
	1.5	Traes_6DS_016F70618.2	--
	0	Traes_3B_A84ED9D40.1	nuclear transcription Y subunit beta
	1.5	Traes_2AS_913212C56.2	amino-acid N-acetyltransferase
	1	Traes_6DS_6190B0566.1	ATP-binding cassette, subfamily A (ABC1), member 1
	2	Traes_2BS_879851C74.1	annexin A7/11
	2	Traes_4AS_5EDE61425.2	--
	1	Traes_7DL_DE178FDB4.1	tetraspanin-5
	1.2	Traes_3AL_04CD57FC2.1	magnesium transporter
	2.5	Traes_3AL_EAADE1825.1	--
	0	Traes_7DL_EFB19C389.1	--
	1.2	Traes_7AL_96383AEEC.1	glucuronoxylan 4-O-methyltransferase
	0	Traes_6DL_F2CADEFF6.1	E3 ubiquitin-protein ligase RNF38/44
	1.5	Traes_7DL_C7C46033E.2	DNA-directed RNA polymerase III subunit RPC5
	0	Traes_2AS_DACE53B24.2	(S)-2-hydroxy-acid oxidase
	0.5	Traes_5AS_9DC956868.2	molecular chaperone DnaJ
	2	Traes_1DL_DC61DA172.1	cytochrome P450, family 26, subfamily A
	0.8	Traes_7BS_941D0F9E7.1	--
	1	Traes_1DS_D08902BD6.1	interleukin-1 receptor-associated kinase 4
	0	Traes_1BS_4E905855D.1	small subunit ribosomal protein S3Ae
	1.2	Traes_5DL_A6EECBC04.1	--
	0.5	Traes_5AL_2D3FB375C.1	--
	2.2	Traes_4BS_F83CB32DD.1	myb proto-oncogene protein, plant
	2	Traes_1AL_6E5BA9C6F.1	light-harvesting complex II chlorophyll a/b binding protein 1
	1.5	Traes_1DL_B38462A5D.1	--
	0.8	Traes_3AL_C9A8E6ED4.1	--
	1.5	Traes_7DL_D1A06F4A0.1	carbonic anhydrase
	1	Traes_5BL_010E1E2A3.1	--
	1.5	Traes_1BS_2F6DD776E.1	guanine nucleotide-binding protein subunit alpha, other
	1	Traes_2AL_229EBA080.1	peroxidase
	2.5	Traes_4DL_9562861FD.2	26S proteasome non-ATPase regulatory subunit 10
	2.2	Traes_3DL_8CF059E3E.1	myo-inositol-1(or 4)-monophosphatase
	1.5	Traes_2BL_ED0C079ED.1	--
	0.5	Traes_7DL_2F413CF0E.2	copper chaperone
	1.5	Traes_3AS_865D5DF28.3	--
	0.8	Traes_4AL_A99729A05.2	FUS-interacting serine-arginine-rich protein 1
	1.2	Traes_7DS_1797D4951.1	pathogenesis-related protein 1
	2.2	Traes_4BS_4BC02509F.1	--
	1	Traes_1DL_66B426FE4.2	homeobox protein Meis1
	2	Traes_6BS_A7DE5BFD1.1	--
	1.5	Traes_1AS_801D9F0BC.1	beta-carotene isomerase
	1	Traes_1DL_41E7D2C4E.1	alcohol dehydrogenase class-P
	2	Traes_6DL_585DD5701.1	--
	1.8	Traes_2DS_9520F146E.1	L-ascorbate oxidase
	1.5	Traes_3AL_3E4E162EE.1	myosin V
	2.5	Traes_1DL_3873CDB4B.2	alpha-1,4-galacturonosyltransferase
	1	Traes_6DS_11583F62A.1	ribonuclease H2 subunit C
	2.2	Traes_1AL_EAA953F21.2	flavonol synthase
	0	Traes_4DS_1EBE1B4E4.1	--
	1	Traes_1BS_A91580A151.2	interleukin-1 receptor-associated kinase 4
	0.5	Traes_1AL_A46B5ED96.2	ATP-binding cassette, subfamily G (WHITE), member 2
	2	Traes_1DL_CC4D484BB.5	--
	2.5	Traes_1DL_84C15D335.1	light-harvesting complex II chlorophyll a/b binding protein 1
	1.5	Traes_6BL_76C2C2F3A.2	sphinganine C4-monooxygenase
	1.5	Traes_3AS_5875028F9.3	ATP-dependent RNA helicase DDX5/DBP2
	1.5	Traes_5AS_244562A2A.1	--
	1	Traes_1AS_1D5A1B790.2	mannosyl-oligosaccharide alpha-1,2-mannosidase
	2.2	Traes_2BL_C7C0901D4.2	mRNA (guanine-N7-)-methyltransferase
	2	Traes_7DS_16B6D3A80.2	release factor glutamine methyltransferase
	1.8	Traes_5BL_769E8EB68.1	--
	1.2	Traes_1BL_A151C620A.5	--
	1	Traes_6AL_8394C0D62.1	peptidyl-prolyl isomerase E (cyclophilin E)
	0	Traes_3DS_561941A6E.1	steroid 3-oxidase
	0.5	Traes_2DL_7511EDD3D.1	--
	1.2	Traes_1DS_783351B30.1	--
	0.5	Traes_5AL_CAF698B25.2	E3 ubiquitin-protein ligase SIAH1
	1.5	Traes_3DL_1DA454A9F.1	--
	1.5	Traes_3DL_F982BF0FB.1	malate dehydrogenase (oxaloacetate-decarboxylating)(NADP+)
	1.8	Traes_2DS_1833BCFE3.1	elongation factor 1 alpha-like protein
	1.8	Traes_5BS_7FF02D8B3.2	spastin
	1.2	Traes_4DL_C615C8567.1	cytochrome c oxidase assembly protein subunit 16
	2.5	Traes_2DL_0E07C67BF.2	HtrA serine peptidase 2
	0.5	Traes_2AS_D5A07A9C6.1	hydroxypyruvate reductase 2
	1.5	Traes_2AS_45A0E50BF.1	serine/threonine-protein phosphatase 5
	2.5	Traes_2AL_AC3FC0869.1	ATP-dependent RNA helicase DDX21
	0.5	Traes_6BL_634758C90.1	MFS transporter, SP family, solute carrier family 2 (myo-inositol transporter), member 13
	2	Traes_7AL_E92ABFC84.1	--
	0.8	Traes_2DL_3C9129432.1	ribosome assembly protein RRB1
	0	Traes_7DS_619769289.1	centromeric protein E
	0.2	Traes_2DL_7D7B1B55D.1	1-deoxy-D-xylulose-5-phosphate synthase
	1.5	Traes_5DS_DA18D86DC.1	protein KRI1
	1.5	Traes_7BL_B78FAD060.1	glutathione S-transferase
	1.5	Traes_6DL_38B41C198.1	--
	0	Traes_5DL_A061F2DD6.1	abnormal spindle-like microcephaly-associated protein
	2	Traes_5BL_756B1DFCF.7	5'-AMP-activated protein kinase, catalytic alpha subunit
	1.5	Traes_2DL_2FB11E18C.1	interleukin-1 receptor-associated kinase 1
	1	Traes_7DL_313D3CE50.1	solute carrier family 15 (peptide/histidine transporter), member 3/4
	0.5	Traes_1DL_05B4AB2E3.1	caffeoylshikimate esterase
	1.8	Traes_6DL_29D1C52F2.1	--
	1	Traes_6BS_E9D7788BF.2	--
	1.2	Traes_4BL_BCC3FB7E7.1	--
	1.5	Traes_2DS_070B0664F.1	--
	0.8	Traes_2AL_1E3B3BC40.2	--
	1.5	Traes_4BL_AB3EBF1FD.2	--
	1.5	Traes_4AS_6C23CE2D6.1	nuclear cap-binding protein subunit 1
	1	Traes_3DL_1825C1F9E.1	prenylcysteine alpha-carboxyl methylesterase
	1.5	Traes_3AL_ED29EBD89.2	prenylcysteine alpha-carboxyl methylesterase
	2	Traes_4AL_E1F21DDA3.4	--
	1.8	Traes_7DL_8711D31FE.4	ribonuclease T2
	2	Traes_4DL_5F8CEB299.1	beta-D-xylosidase 4
	1.5	Traes_7DS_EAE3FBECD.2	U4/U6 small nuclear ribonucleoprotein PRP3
	2	Traes_1DS_BB3A94D5B.2	tricin synthase
	1.5	Traes_5AL_637B13721.2	--
	0.5	Traes_1AL_43F02DB49.1	dolichyl-diphosphooligosaccharide--protein glycosyltransferase
	1.5	Traes_6AL_9F1580D39.1	beta-ring hydroxylase
	0.8	Traes_7BL_002EE3EC3.1	--
miR1131	2	Traes_2DS_493240182.1	4-hydroxyphenylacetaldehyde oxime monooxygenase
	1.5	Traes_1DS_A589B1D9F.1	SET and MYND domain-containing protein
miR1133	2	Traes_4BL_CC7FF6AC8.1	signal peptide peptidase-like 2B
	2	Traes_7AS_B77C9DE4D.1	4,4-dimethyl-9beta,19-cyclopropylsterol-4alpha-methyl oxidase
	1.8	Traes_2DL_C29EDC564.1	cinnamoyl-CoA reductase
	2	Traes_6BL_D413BB851.2	--
	2	Traes_6AL_D1FCF6297.2	hydroxymethylglutaryl-CoA reductase (NADPH)
	1.8	Traes_7AS_C24C1C15A.1	aquaporin NIP
	2	Traes_2DL_4481C0380.1	serine carboxypeptidase-like clade I
	0.8	Traes_5AL_9B37C7CDB.2	phosphatidylinositol phospholipase C, delta
	1.5	Traes_3DL_64EACAD9C.1	cinnamoyl-CoA reductase
	2.5	Traes_6AS_F18C49565.1	far upstream element-binding protein
miR1135	2	Traes_1AL_1EB3BBACE.2	transcription elongation factor SPT5
	1.8	Traes_4DL_8C572B927.1	E3 ubiquitin-protein ligase RNF115/126
	2.2	Traes_7AS_9674F6981.4	dynamin GTPase
	2.2	Traes_1AL_5DA69A7AC.2	midasin
	1.2	Traes_3AL_4A93BA5FF.1	myosin V
	1	Traes_1AS_6C2BED457.1	--
	1.2	Traes_3AL_7F0DD95F8.2	GTP-binding protein
	1.5	Traes_2DS_82116F38F.1	p70 ribosomal S6 kinase
	2.2	Traes_1AL_EDBE3B3F1.1	tetraspanin-5
	0	TRAES3BF065400200CFD_t1	--
	2.5	Traes_5AL_9034AB386.1	(S)-2-hydroxy-acid oxidase
	2.5	Traes_4AS_4F615C5CC.2	homeobox protein Meis2
	1.5	Traes_7AL_8C73DEC63.1	magnesium/proton exchanger
	1	Traes_1BS_24FC582AD.1	2,4-dihydroxy-1,4-benzoxazin-3-one-glucoside dioxygenase
	1.8	Traes_1BS_406EE2272.1	heat shock 70kDa protein 1/8
	1.2	Traes_7DL_DA620801B.1	signal peptide peptidase-like 2B
	2	Traes_4AS_D13EBCE43.2	--
	2.2	Traes_3B_6F5009CC4.1	AP-3 complex subunit sigma
	2.2	Traes_5AL_38B610793.2	pre-mRNA-processing factor 8
	2.2	Traes_6BS_147BF2D07.2	zinc transporter, ZIP family
	1.2	Traes_2AS_A98A48472.2	--
	0	Traes_2DS_BCB7C3C11.1	mTERF domain-containing protein, mitochondrial
	2.5	Traes_5AL_BE831EEC2.4	RNA exonuclease 4
	1	Traes_2DL_C9AF029BD.1	--
	2	Traes_1AS_6C4BEE0B0.1	--
	1.8	Traes_4DL_253F18B56.1	HSP20 family protein
	1.5	Traes_4BS_718B422BF.2	cysteine synthase A
	1.8	Traes_5BL_9FE55989B.1	multidrug resistance protein, MATE family
	1	Traes_4AL_F04F9FDF5.1	phospholipase A1
	2.5	Traes_6BS_2BCF1B8D0.2	beta-fructofuranosidase
	1.2	Traes_5AL_675D0818E.2	cytochrome c-type biogenesis protein CcmH
miR1136	0.5	Traes_6AL_C13753B31.1	myb proto-oncogene protein, plant
	1.8	Traes_5BS_AE8F8B4E8.1	--
	2	Traes_7BL_56B80DB6F.1	meiotic recombination protein SPO11
	1	Traes_2BS_4914C7128.1	--
	1.5	Traes_1AS_6C2BED457.1	--
	1.5	Traes_6BS_8EB9E6EC7.2	disease resistance protein RPM1
	1.5	Traes_1AS_7AB089C23.1	--
miR1137b-5p	1.5	Traes_4DL_CD9F2C6A5.1	mitochondrial ABC transporter ATM
	0.5	Traes_5DS_60405F11E.2	--
	2.5	Traes_6BL_D413BB851.2	--
	2.5	Traes_7AS_113EAE23E.2	heterogeneous nuclear ribonucleoprotein A1/A3
	0	Traes_5BL_6C7389D01.1	hydroxymethylglutaryl-CoA lyase
	2.5	Traes_2AS_E022ED09E.1	disease resistance protein RPM1
	1.5	Traes_5DL_5087E701C.1	probable RNA-binding protein EIF1AD
	2.2	Traes_7AL_0FB67374A.2	--
	2.5	Traes_4AL_68FAFA3FA.1	--
	2.5	Traes_4BL_F24448A6C.1	phosphoglucomutase
	2.5	Traes_5BL_9C75B8022.4	--
	2.5	Traes_2DS_D014BDCA2.1	pectinesterase
	2.5	Traes_7AS_61114500F.1	alpha-1,4-galacturonosyltransferase
	2.5	Traes_6DL_181DE87D6.1	--
	2.5	Traes_6AL_7036B394F.1	--
	2.5	Traes_5AL_E3D3E2A1E.1	indole-3-glycerol-phosphate lyase
	2.5	Traes_7AL_47158BA7C.2	--
	2.5	Traes_6AL_10669329F.1	26S proteasome regulatory subunit N7
	1	Traes_3DL_64EACAD9C.1	cinnamoyl-CoA reductase
	1	Traes_2BL_07AD14DF5.2	cysteamine dioxygenase
	0	Traes_4BL_B5A5FB2EB.2	tyrosyl-DNA phosphodiesterase 2
	0	Traes_4BL_F3D5D7034.2	--
	2.5	Traes_2AL_44725A666.1	sn1-specific diacylglycerol lipase
	2.5	Traes_1DL_BA95A7496.1	uncharacterized protein
	1	Traes_5AL_3021F14D8.1	SAUR family protein
	2.5	Traes_2DL_D74FEB54D.2	--
	2.5	Traes_1BL_52343A948.1	--
	1.5	Traes_7BL_F27D01730.1	serine/threonine-protein kinase TNNI3K
	2.2	Traes_1DS_0E91E3E72.2	heparan-alpha-glucosaminide N-acetyltransferase
	2.5	Traes_1DL_2468BECD3.1	DNA-directed RNA polymerase II subunit RPB1
	1.5	Traes_2BL_94F1CBB3C.1	--
	2	Traes_3DS_CD4A3DDDD.1	photosystem II oxygen-evolving enhancer protein 2
	2	Traes_3DS_DE6997A0D.1	--
	1	Traes_2BL_4EAE12D10.1	zinc finger SWIM domain-containing protein 3
	2.5	Traes_6DS_7402E88F1.1	apyrase
	2.5	Traes_3DS_2D80CF4F8.1	translation initiation factor 4E
	0	Traes_6AS_F18C49565.1	far upstream element-binding protein
	2.5	Traes_3DS_4C621C213.1	WD40 repeat-containing protein SMU1
	2	Traes_6BS_1F8620694.1	--
	1.5	Traes_4BS_35E7A5D8E.2	--
	0	Traes_4AL_9F373E931.1	--
	2.5	Traes_1AS_BF353B963.3	disease resistance protein RPM1
	2	Traes_7AL_1F9ADD0CA.1	E3 ubiquitin-protein ligase RNF13
	2.5	Traes_4DL_E85C4F1A4.1	solute carrier family 25 (mitochondrial carnitine/acylcarnitine transporter), member 20/29
	0	Traes_1AL_2116059A5.1	transcription factor Dp-1
	2.5	Traes_4DL_905A85957.3	--
	0	Traes_4DS_28E6C4F21.3	--
	0	Traes_2BL_2B983AD37.1	26S proteasome regulatory subunit T3
	1.5	Traes_2BL_EEAB95BC7.1	--
	2.5	Traes_3AL_20404D7E4.1	mitochondrial-processing peptidase subunit alpha
	2.2	Traes_2BS_4914C7128.1	--
	0	Traes_6DL_59537CE7A.2	legumain
	2.5	Traes_1DS_A8D27A55B.2	protein transport protein SEC20
	2.5	Traes_2DL_EF5D7C7E4.1	cysteinyl-tRNA synthetase
	0	Traes_6BL_462C2179A.1	tripeptidyl-peptidase II
	0	Traes_1BL_EC3E899FE.1	glutamyl-tRNA reductase
	2	Traes_1AS_41E7FE70A.1	E3 ubiquitin-protein ligase synoviolin
	1.5	Traes_5AL_F7E58998F.1	--
	1	Traes_2DS_CA627938A.1	DNA primase large subunit
	2.5	Traes_4AL_2A5DEA0BB.1	--
	1.5	Traes_5DL_0BA03F514.4	serine carboxypeptidase-like clade II
	2	Traes_4AS_E01B18DB6.4	--
	2.5	Traes_6BS_CC6E9FE39.1	transcription factor TGA
	2.5	Traes_6BL_88E2FBDC9.1	cell division cycle 2-like
	2.5	Traes_5BL_FD0EDD217.1	cyclin C
	0	Traes_3AL_77C1A835E.2	CTD small phosphatase-like protein 2
	0	Traes_5BS_40B7DA6EE.1	--
	2.5	Traes_2DL_CAE4AEC4D.1	peroxidase
	2.5	Traes_2BS_778FD15DC.1	beta-galactoside alpha-2,3-sialyltransferase (sialyltransferase 4A)
	1.5	Traes_4BL_165838228.1	solute carrier family 32 (vesicular inhibitory amino acid transporter)
	0	Traes_2BL_49CBDC51B.1	interleukin-1 receptor-associated kinase 1
	1	Traes_7DL_9DCE675DE.2	epsin
	0	Traes_7AS_D0A89CDD4.1	--
	0	Traes_7AL_AFF655BDD.2	--
	0	Traes_2BL_08F554A3C.2	--
	1.5	Traes_4BL_415F0F7C7.2	xylose isomerase
	1	Traes_5BL_6D79EDFAA.1	interleukin-1 receptor-associated kinase 1
	0	Traes_7BL_11C5C7BC4.1	1,4-alpha-glucan branching enzyme
	1.5	Traes_2BL_4BFCCF562.1	--
	0	Traes_4BS_59715D886.1	--
	1	Traes_2AS_70A738C1B.2	--
	1.5	Traes_4BL_B4A3BF346.1	mitochondrial ABC transporter ATM
	2	Traes_4BL_CC7FF6AC8.1	signal peptide peptidase-like 2B
	2	Traes_3AS_C04D41416.1	phospho-N-acetylmuramoyl-pentapeptide-transferase
	1	Traes_2BS_B8F275683.1	--
	0	Traes_7BS_B6E41024D.2	--
	0.5	Traes_5AL_2765E104A.1	splicing factor 3B subunit 4
	2.5	Traes_2AS_6BF19AB61.1	beta-galactoside alpha-2,3-sialyltransferase (sialyltransferase 4A)
	0	Traes_3DL_7EF7BC2E0.1	oligosaccharide translocation protein RFT1
	1.5	Traes_6DL_ED39B0BC0.1	two-component response regulator ARR-A family
	0	Traes_5BL_1F9DF8D94.1	--
	2.5	Traes_6DS_90923023B.1	--
	2.5	Traes_6BL_E1793636C.1	MADS-box transcription factor, plant
	1	Traes_7DL_5B4B21BA0.1	galacturan 1,4-alpha-galacturonidase
	2	Traes_3DL_864BD44EB.1	--
	2.5	Traes_7AL_61C51C0CD.1	LETM1 and EF-hand domain-containing protein 1, mitochondrial
	2	Traes_7AS_253CD9243.1	retinol dehydrogenase 12
	1	Traes_2AS_A84BCA3A7.2	--
	2	Traes_1BS_A309ED723.1	splicing factor U2AF 65 kDa subunit
	0	Traes_7AS_23DFA827E.1	COMPASS component SWD3
	1.5	Traes_4AS_003038E6A.1	euchromatic histone-lysine N-methyltransferase
	2.5	Traes_2BS_FDE08A6CB.1	cyanidin-3-O-glucoside 2''-O-glucuronosyltransferase
	2	Traes_2AL_F68F429C1.1	DNA excision repair protein ERCC-6
	2.5	Traes_6BS_E8E6C362B.1	--
	1.5	Traes_4AS_2EC69B90D.1	mitochondrial ABC transporter ATM
	2	Traes_7AS_2D94ACEA3.2	ataxia telangiectasia mutated family protein
	1	Traes_1DS_FFEF78B03.1	acetolactate synthase I/II/III large subunit
	1	Traes_2AL_A2F36EF77.2	pentatricopeptide repeat domain-containing protein 1
	1.5	Traes_6AL_66053907E.1	--
	1	Traes_7AS_C24C1C15A.1	aquaporin NIP
	0	Traes_2DL_C29EDC564.1	cinnamoyl-CoA reductase
	2.5	Traes_4BL_37FDD905B.1	phosphoglucomutase
	1.8	Traes_5BL_4E29CB020.2	disease resistance protein RPM1
	1	Traes_1DL_BB1076D6B.1	speckle-type POZ protein
	2.5	Traes_7BL_EC589B489.1	metal transporter CNNM
	2.5	Traes_3DS_F06D2F641.1	ribonuclease Z
	2	Traes_5AL_1C1842EF9.1	OPC-8:0 CoA ligase 1
	2	Traes_2AL_46A17F0C9.1	--
	2.5	Traes_4AS_6C23CE2D6.1	nuclear cap-binding protein subunit 1
	0	Traes_2BL_C94C7EAAF.2	interleukin-1 receptor-associated kinase 1
	0	Traes_2BS_C9C1928B7.5	--
	2	Traes_2BL_37BE86019.1	cytochrome P450, family 26, subfamily A
	0	Traes_5BL_0EC4788EF.2	beta-fructofuranosidase
	2.5	Traes_5BL_974F53A4E.1	indolin-2-one monooxygenase
	0	Traes_4AL_041B3C745.1	--
	0	Traes_1DL_C66FA913A.1	--
miR1139	1	Traes_1AS_74E6A4EC7.4	mTERF domain-containing protein, mitochondrial
	2.5	Traes_6BL_27A5E0FD7.1	apocytochrome f
miR1163.2	2	Traes_6DL_B7D1F212A.1	leucine-rich PPR motif-containing protein, mitochondrial
	2.2	Traes_5AS_4A059C548.2	lysine-specific demethylase 3
	2	Traes_4BS_5EC01BC81.1	nuclear autoantigenic sperm protein
	2	Traes_2DS_B9F32C292.2	--
	1.8	Traes_2BL_5D64E8C87.1	glyceraldehyde-3-phosphate dehydrogenase (NADP+) (phosphorylating)
	2.5	Traes_4AL_0A3D7BB7F.1	acyl-
	2.5	Traes_3B_CC4C8CE31.1	5'-AMP-activated protein kinase, regulatory gamma subunit
	2.5	Traes_4DS_5644BB36D.3	acyl-
	1.8	Traes_2BL_5BF64063E.1	caffeoylshikimate esterase
	0	Traes_1BL_4D92EE687.1	--
	1.2	Traes_3AL_C4A874BDE.1	--
	1.8	Traes_2AL_783CF383F.1	glyceraldehyde-3-phosphate dehydrogenase (NADP+) (phosphorylating)
	1.8	Traes_5BL_1D099E868.1	cleavage and polyadenylation specificity factor subunit 6/7
	2.5	Traes_1AL_CD341167E.2	--
	2.2	Traes_4DL_B75BA7E6C.1	omega-3 fatty acid desaturase (delta-15 desaturase)
	2.2	TRAES3BF151200020CFD_t1	1,4-dihydroxy-2-naphthoate octaprenyltransferase
	2.2	Traes_3AS_65AFE0153.1	E3 ubiquitin-protein ligase RNF38/44
	2.5	TRAES3BF092600020CFD_t1	5'-AMP-activated protein kinase, regulatory gamma subunit
	2.2	Traes_7DS_25F082B1E.1	pentatricopeptide repeat domain-containing protein 1
	2	Traes_4BL_9EC7914EB.1	beta-fructofuranosidase
	1.8	Traes_2DL_DAEE46171.1	caffeoylshikimate esterase
	2.2	Traes_4BL_202D66FCD.2	1,4-dihydroxy-2-naphthoate octaprenyltransferase
	2.5	Traes_2AS_9D1FC09D7.1	structure-specific endonuclease subunit SLX1
	2.5	Traes_3DL_1873B5327.1	hydroxymethylglutaryl-CoA reductase (NADPH)
	2	Traes_6AL_53EB949E3.2	--
	0.5	Traes_1BL_5EBE999F6.3	golgi-specific brefeldin A-resistance guanine nucleotide exchange factor 1
	2.5	Traes_5DL_A936CFB8C.1	glutathione S-transferase
	1.8	TRAES3BF077200050CFD_t1	--
	1.8	Traes_2DS_93EAEC654.2	ABA responsive element binding factor
	2	Traes_6AL_3A0550225.1	LRR receptor-like serine/threonine-protein kinase FLS2
	2.2	Traes_2DS_9AE3D3114.1	--
	2.5	TRAES3BF094000040CFD_t1	5'-AMP-activated protein kinase, regulatory gamma subunit
	2.5	Traes_7AL_82A50BB4C.1	signal peptide peptidase-like 2B
	0.5	Traes_1DL_5F2B1C36A.1	golgi-specific brefeldin A-resistance guanine nucleotide exchange factor 1
	2.5	Traes_6AS_988FE408C.1	3-ketoacyl-CoA synthase
	2.2	Traes_7AL_0DD4C9A6C.1	1,4-dihydroxy-2-naphthoate octaprenyltransferase
	1.8	Traes_2AL_D4901FE23.1	caffeoylshikimate esterase
	2.5	Traes_4AL_005C75E88.1	--
	2.2	Traes_1BL_F439F0D99.1	caffeoylshikimate esterase
	0.5	Traes_1AL_43C49D143.6	golgi-specific brefeldin A-resistance guanine nucleotide exchange factor 1
miR1216	2.5	Traes_7AS_779E8A5D2.1	--
	2	Traes_4BL_3D74EF963.1	fatty-acyl-CoA synthase
	1.5	Traes_6AL_B27D57521.1	--
	2.5	Traes_1DL_43162594B.2	--
	2	Traes_1BL_FD53D8E31.2	--
	2.5	TRAES3BF081500040CFD_t1	--
miR1223j	1.5	Traes_7BS_704A245EA.1	E3 ubiquitin-protein ligase RNF13
	0.5	Traes_3DS_E1A0FCAD8.2	speckle-type POZ protein
	0.5	Traes_3AL_27BB52EDA.1	malonyl-CoA/methylmalonyl-CoA synthetase
miR1432-3p	2	Traes_7AS_65D30728D.2	ubiquitin-like-specific protease 1C/D
	1.5	Traes_7BS_24D3F72D8.1	ubiquitin-like-specific protease 1C/D
	2	Traes_7DS_D046B30B4.1	ubiquitin-like-specific protease 1C/D
	2.5	Traes_7BL_D5DAE2B7E.1	--
miR1432-5p	1.5	TRAES3BF011900010CFD_t1	L-tryptophan---pyruvate aminotransferase
	0.8	Traes_1BL_19E9499CD.1	calmodulin
	1.5	Traes_4AS_4B81C93C0.1	DNA polymerase I
	0.8	Traes_1DL_696E3F6A2.2	calmodulin
	0.8	Traes_1AL_D7A903FD2.1	calmodulin
	0.8	Traes_1AL_A8C52986E.2	calmodulin
	2	Traes_2BL_B19D13EC2.1	acyl-coenzyme A thioesterase 13
	1.8	Traes_1DL_C3C407FC1.1	calmodulin
miR1436	1.5	Traes_6DL_A95013422.2	sn1-specific diacylglycerol lipase
	1.5	Traes_2AS_CBB2430AD.1	--
	2	Traes_5BL_6C7389D01.1	hydroxymethylglutaryl-CoA lyase
	2	Traes_3B_24278CD93.1	isoleucyl-tRNA synthetase
	1.5	Traes_6DL_36006E6FD.1	engulfment and cell motility protein 3
	1.5	Traes_3AL_20404D7E4.1	mitochondrial-processing peptidase subunit alpha
	2	Traes_5DL_8FBC01EB0.1	--
	2	Traes_7DS_543FA5302.1	DNA topoisomerase I
	1.5	Traes_7DL_C7C46033E.2	DNA-directed RNA polymerase III subunit RPC5
	0	Traes_1DL_9FE4D295D.2	--
	2	Traes_4AL_D971AF25D.2	cytosolic prostaglandin-E synthase
	1.2	Traes_1DL_F9213AB33.1	KDEL-tailed cysteine endopeptidase
	2.5	Traes_5DL_A6EECBC04.1	--
	2.5	Traes_2AL_BE5540B1E.1	malate synthase
	2	Traes_6DL_A72132FC8.1	serine carboxypeptidase-like clade II
	2	Traes_6AL_A93C6F2FC.1	MADS-box transcription factor, plant
	1	Traes_7DL_313D3CE50.1	solute carrier family 15 (peptide/histidine transporter), member 3/4
	0	Traes_7DL_EFB19C389.1	--
	0	Traes_1BS_4E905855D.1	small subunit ribosomal protein S3Ae
	0.5	Traes_4BS_E52BF8FF4.1	--
	2	Traes_6BL_A054ACEB9.1	--
	1.5	Traes_2BL_14B133AEB.1	fructose-bisphosphate aldolase, class I
	1.5	Traes_5BL_45662533A.1	--
	0.2	Traes_5DL_432CC0CB0.1	electron transfer flavoprotein alpha subunit
	1	Traes_5BL_FD504C45C.1	uncharacterized protein
	2	Traes_1DL_6794DEC57.1	--
	2	Traes_6DL_8220431F0.2	--
	2.5	Traes_1AL_CD4872CA5.2	myosin heavy chain
	0.2	Traes_6DS_6190B0566.1	ATP-binding cassette, subfamily A (ABC1), member 1
	2	Traes_6BS_A4F1E63CE.2	23S rRNA (adenine1618-N6)-methyltransferase
	1	Traes_7BS_941D0F9E7.1	--
	2	Traes_2DL_45F0B52C7.1	interleukin-1 receptor-associated kinase 1
	2.5	Traes_4DL_CD9F2C6A5.1	mitochondrial ABC transporter ATM
	2	Traes_5DS_5BB2751BD.2	disease resistance protein RPM1
	2	Traes_1DL_BEB975B5B.2	leucine-rich PPR motif-containing protein, mitochondrial
	1	Traes_4AL_A99729A05.2	FUS-interacting serine-arginine-rich protein 1
	1.5	Traes_2BL_2657EE5E2.1	protein phosphatase 1L
	1.5	Traes_1AS_1DDA1FCAB.1	nucleoporin GLE1
	2	Traes_1AL_D0CB07C73.1	glucose-6-phosphate 1-epimerase
	0.5	Traes_4DS_1EBE1B4E4.1	--
	2	Traes_3AS_B6A286A65.2	integrator complex subunit 7
	2	Traes_2BS_4D515766C.1	--
	1.5	Traes_2DS_198CE54FE.1	splicing factor, arginine/serine-rich 17
	1.2	Traes_6AL_1F3D8B768.1	--
	2	Traes_5DL_8EB78B599.1	aspartate-semialdehyde dehydrogenase
	1.5	Traes_2BL_316434127.1	--
	2	Traes_2DS_69E67704C.2	pyruvate dehydrogenase kinase 2/3/4
	2	Traes_6BS_A7DE5BFD1.1	--
	2.2	Traes_2AS_45A0E50BF.1	serine/threonine-protein phosphatase 5
	1.8	Traes_2DL_33C07CAFB.1	--
	0.5	Traes_6AS_E5666AE7C.1	E3 ubiquitin-protein ligase RNF13
	0.5	Traes_4DS_990D31BB1.6	elongation factor 1-alpha
	1.2	Traes_3AL_C9A8E6ED4.1	--
	2	Traes_7DS_CA0DAA41B.1	GTP-binding protein LepA
	0.5	Traes_7DL_ACACA513D.2	transcriptional repressor NF-X1
	0.5	Traes_2DL_7511EDD3D.1	--
	0.8	Traes_2BL_9685774DE.1	mTERF domain-containing protein, mitochondrial
	0.5	Traes_7BL_002EE3EC3.1	--
	1.5	Traes_2AL_A549CD02E.2	--
	1	Traes_7DL_85A6FC0F2.1	--
	0.5	Traes_1DS_D08902BD6.1	interleukin-1 receptor-associated kinase 4
	1.5	Traes_3DL_F982BF0FB.1	malate dehydrogenase (oxaloacetate-decarboxylating)(NADP+)
	1.5	Traes_7BS_BA937B73D.2	2,3-bisphosphoglycerate-dependent phosphoglycerate mutase
	0	Traes_5DL_A061F2DD6.1	abnormal spindle-like microcephaly-associated protein
	2	Traes_4BL_BCC3FB7E7.1	--
	2	Traes_7DS_16B6D3A80.2	release factor glutamine methyltransferase
	0.8	Traes_2DL_7D7B1B55D.1	1-deoxy-D-xylulose-5-phosphate synthase
	1	Traes_4AL_1C6E2A6BF.1	ERO1-like protein alpha
	1.5	Traes_4AS_7018A6800.1	23S rRNA (adenine2503-C2)-methyltransferase
	2.5	Traes_3B_D3F75F9E9.1	zinc finger protein
	1.5	Traes_4DL_D03165926.1	protein xylosyltransferase
	0.5	Traes_3DL_858101A78.2	DNA-directed RNA polymerase III subunit RPC4
	1.5	Traes_3DL_8DA1E6EE6.1	small subunit ribosomal protein S1
	1	Traes_1AL_6B108514B.1	MADS-box transcription factor, plant
	1.5	Traes_6DS_11583F62A.1	ribonuclease H2 subunit C
	1.5	Traes_3AL_0CC239219.1	malonyl-CoA/methylmalonyl-CoA synthetase
	2	Traes_5BL_974F53A4E.1	indolin-2-one monooxygenase
	0.5	Traes_2DL_5750F91AA.1	U4/U6.U5 tri-snRNP-associated protein 1
	2	Traes_4AL_2AF93C16B.1	--
	2	Traes_5AS_98B9EF5B2.1	--
	2	Traes_1AS_10C467127.1	cellulose synthase A
	1.5	Traes_3AL_88DD697D6.1	farnesol kinase
	2.5	Traes_5AS_244562A2A.1	--
	2	Traes_7BL_4062FFB27.1	ubiquitin-like 1-activating enzyme E1 A
	1	Traes_2DL_BCFBE0E93.2	alpha-amylase
	1.5	Traes_5AL_6A1F041A8.1	UDP-glucose:(indol-3-yl)acetate beta-D-glucosyltransferase
	1.5	Traes_2BL_A59C00F48.1	--
	0	Traes_6BS_F87437638.3	--
	2	Traes_5AL_670A84226.3	--
	1	Traes_7DL_659883F3D.1	--
	2	Traes_1BL_99CE41F50.1	magnesium transporter
	2	Traes_4BL_F3D5D7034.2	--
	1	Traes_4BS_83A556A42.1	interleukin-1 receptor-associated kinase 4
	1.5	Traes_6BS_FDDC181D1.1	20S proteasome subunit alpha 6
	1	Traes_4BL_6CBFA2771.1	translation initiation factor 2 subunit 1
	0.5	Traes_5AL_CAF698B25.2	E3 ubiquitin-protein ligase SIAH1
	1.5	Traes_6AL_E308E6BC8.1	26S proteasome regulatory subunit N7
	0.2	Traes_2DS_9BCFF2B80.1	--
	1.5	Traes_4DL_905A85957.3	--
	2	Traes_2BL_2B983AD37.1	26S proteasome regulatory subunit T3
	1.5	Traes_1AS_801D9F0BC.1	beta-carotene isomerase
	2	Traes_3DS_C459F4B3B.1	--
	2	Traes_3DL_905C6A6BC.1	--
	2.5	Traes_5AL_3021F14D8.1	SAUR family protein
	1	Traes_7AS_7E99B3482.1	pathogenesis-related protein 1
	2	Traes_3AL_77C1A835E.2	CTD small phosphatase-like protein 2
	2.5	Traes_4BS_6592C8BFB.1	interleukin-1 receptor-associated kinase 1
	2.5	Traes_2BS_41BB88428.2	MFS transporter, SP family, solute carrier family 2 (facilitated glucose transporter), member 8
	2	Traes_7AS_A511E66E6.2	serine carboxypeptidase-like clade I
	1.5	Traes_7DL_C1366F921.1	pentatricopeptide repeat domain-containing protein 1
	1	Traes_4BS_4BC02509F.1	--
	0.5	Traes_6AL_D85750CB6.2	vacuolar protein sorting-associated protein 45
	0.5	Traes_6DS_016F70618.2	--
	0.5	Traes_2AS_D5A07A9C6.1	hydroxypyruvate reductase 2
	1	Traes_7DL_DE178FDB4.1	tetraspanin-5
	0	Traes_4AS_049576319.2	cytochrome c oxidase assembly protein subunit 16
	2.5	Traes_2DS_3BA4A57A9.1	--
	1	Traes_7AS_F38BE6DA7.1	signal recognition particle receptor subunit beta
	1	Traes_6AL_3FB51E7F6.1	ATP-dependent Clp protease ATP-binding subunit ClpX
	0.5	Traes_6BL_F03DF2949.2	signal peptide peptidase-like 2B
	0.8	Traes_4DL_6FC6B26E7.2	guanylate kinase
	1	Traes_3AL_ED29EBD89.2	prenylcysteine alpha-carboxyl methylesterase
	2	Traes_5AS_68FB50ED1.2	spastin
	2	Traes_1BS_E0F21D7B0.2	casein kinase 1, delta
	1.8	Traes_2BL_09184B677.2	TatD DNase family protein
	2	Traes_3DS_ED2C5F527.1	disease resistance protein RPM1
	2.5	Traes_1DL_B38462A5D.1	--
	2	Traes_2BL_928000A2B.2	E3 ubiquitin-protein ligase HERC4
	2.5	Traes_7AL_976D6E1B9.1	--
	2.5	Traes_4BS_F83CB32DD.1	myb proto-oncogene protein, plant
	1.5	Traes_1BL_3187C7C75.2	EIX receptor 1/2
	0	Traes_6DL_38B41C198.1	--
	2	Traes_5BL_769E8EB68.1	--
	0.5	Traes_1DL_05B4AB2E3.1	caffeoylshikimate esterase
	2.5	Traes_1AL_FA4A9FA74.1	gelsolin
	1.5	Traes_2AS_D38A5E045.1	amidase
	0.5	Traes_2BL_07C9811CB.1	--
	2	Traes_5BL_C83F945F6.2	--
	0.5	Traes_1BS_D81E948D7.1	histone acetyltransferase
	1	Traes_3AL_C0D1C4403.1	malate dehydrogenase (oxaloacetate-decarboxylating)(NADP+)
	1	Traes_4BL_65EF527FF.1	interleukin-1 receptor-associated kinase 1
	0.5	Traes_7DS_CA6B7FD1A.1	zeta-carotene desaturase
	1.5	Traes_7AS_97BCB0125.1	--
	1.8	Traes_4BS_35F8C45F6.1	protein HIRA/HIR1
	2.5	Traes_5BS_46B8030E9.1	protein transport protein SEC61 subunit beta
	2	Traes_4BL_D0A4BA44F.2	cytoplasmic FMR1 interacting protein
	1.8	Traes_6BL_76C2C2F3A.2	sphinganine C4-monooxygenase
	1	Traes_7AS_45F0BB787.2	--
	2	Traes_2BL_C94C7EAAF.2	interleukin-1 receptor-associated kinase 1
	2	Traes_4BL_B2C3C5616.2	ubiquitin-conjugating enzyme E2 O
	1.5	Traes_5AL_2D3FB375C.1	--
	0.5	Traes_1DL_CC4D484BB.5	--
	2	Traes_4DL_97AA63CA2.1	--
	2	Traes_2DL_6C96847B3.1	leucine-rich PPR motif-containing protein, mitochondrial
	1.5	Traes_6BL_81B30CFDA.2	3,5-epimerase/4-reductase
	2	Traes_4BL_5C52625BF1.1	beta-amylase
	1	Traes_1BS_A91580A151.2	interleukin-1 receptor-associated kinase 4
	2.5	Traes_3DL_8CF059E3E.1	myo-inositol-1(or 4)-monophosphatase
	1.5	Traes_2DS_070B0664F.1	--
	0	Traes_2DS_C8CC2F963.1	ATP-dependent RNA helicase DDX21
	1.5	Traes_4DL_9294C72F2.1	--
	2	Traes_3AS_CB2434231.1	--
	1.5	Traes_7DS_53584A6AD.2	omega-amidase
	2	Traes_2BL_13C33B42C.2	shikimate O-hydroxycinnamoyltransferase
	0.5	Traes_1AL_43F02DB49.1	dolichyl-diphosphooligosaccharide--protein glycosyltransferase
	0.5	Traes_5AL_1311205EE.2	sacsin
	2	Traes_3AL_04CD57FC2.1	magnesium transporter
	0.5	TRAES3BF038300070CFD_t1	--
	2	Traes_3AL_30294D0A5.1	glycerol-3-phosphate dehydrogenase (NAD+)
	2.5	Traes_4BS_8D508569E.1	pentatricopeptide repeat domain-containing protein 1
	1	Traes_7AL_FFC5B8676.1	--
	1	Traes_1DL_DC61DA172.1	cytochrome P450, family 26, subfamily A
	1	Traes_7BS_E3E8C9AAE.1	signal recognition particle receptor subunit beta
	1.5	Traes_3AL_3E4E162EE.1	myosin V
	1.8	Traes_4BL_AB3EBF1FD.2	--
	2	Traes_1AL_6E5BA9C6F.1	light-harvesting complex II chlorophyll a/b binding protein 1
	2	Traes_3AS_D23A03DFB.1	--
	2	Traes_1BL_CC7DEED87.2	--
	2	Traes_2AL_CF3ED6421.1	large subunit ribosomal protein L41
	0.5	Traes_7DS_CAB1BF6AC.1	--
	1.5	Traes_2BS_D4E86AAA6.1	xylose isomerase
	0.5	Traes_7DL_D2EB7B8DF.1	E3 ubiquitin-protein ligase EL5
	2	Traes_2BL_BE598F27F.2	--
	0	Traes_2AL_A807B3759.2	cyclopropane-fatty-acyl-phospholipid synthase
	0.5	Traes_6BL_9E43B8FCD.1	--
	0.5	Traes_5DL_F243512BC.2	--
	2	Traes_2AL_D2DE47A2A.1	signal peptidase complex subunit 2
	2	Traes_2BS_879851C74.1	annexin A7/11
	2	Traes_2BS_71A601005.2	amino-acid N-acetyltransferase
	1.5	Traes_6BL_634758C90.1	MFS transporter, SP family, solute carrier family 2 (myo-inositol transporter), member 13
	2	Traes_1BL_E2E2ED3FE.1	DnaJ homolog subfamily C member 17
	0	Traes_2AL_EE1350B36.1	mTERF domain-containing protein, mitochondrial
	1.2	Traes_3AS_993B34F61.1	--
	2	Traes_4DS_5FF646FC1.2	small subunit ribosomal protein S16e
	2	Traes_7AS_B7BA40D9B.1	lipopolysaccharide-binding protein
	1.8	Traes_1DS_A8D27A55B.2	protein transport protein SEC20
	2	Traes_5DL_17E38786F.1	triosephosphate isomerase (TIM)
	1.5	Traes_6AL_9F1580D39.1	beta-ring hydroxylase
	0.5	Traes_5DL_DFE47E78E.1	--
	0.5	Traes_3B_F66658675.1	interleukin-1 receptor-associated kinase 4
	2.5	Traes_5BS_AE8F8B4E8.1	--
	1.5	Traes_4AL_F00707FAF.2	abnormal spindle-like microcephaly-associated protein
	2	Traes_2DL_5C445EE47.1	--
	2	Traes_2AS_70A738C1B.2	--
	2	Traes_5BL_1F9DF8D94.1	--
	1.8	Traes_6AS_3AC3DD191.3	kelch-like protein 2/3
	2	Traes_7DS_1797D4951.1	pathogenesis-related protein 1
	1	Traes_6AL_8394C0D62.1	peptidyl-prolyl isomerase E (cyclophilin E)
	2	Traes_4BS_787A31F78.1	novel plant SNARE
	2	Traes_1DL_547D8DAC2.1	MFS transporter, SP family, solute carrier family 2 (myo-inositol transporter), member 13
	2	Traes_2BS_B0758F329.1	cleavage and polyadenylation specificity factor subunit 1
	0.8	Traes_7DL_D1A06F4A0.1	carbonic anhydrase
	1	Traes_5BL_9010C082A.1	hydroquinone glucosyltransferase
	2	Traes_2AL_79AD48080.1	heparan-alpha-glucosaminide N-acetyltransferase
	2	Traes_4AL_CDC2424AB.2	cyanohydrin beta-glucosyltransferase
	1	Traes_4BL_A2081ED30.1	importin subunit beta-1
	1.5	Traes_1AS_41E7FE70A.1	E3 ubiquitin-protein ligase synoviolin
	1.5	Traes_2AL_60AE83514.1	phospholipase A-2-activating protein
	2	Traes_6DL_1E5B5985B.1	glutamate receptor, ionotropic, plant
	2	Traes_4BL_A338A98AF.1	elongation factor 1-alpha
	0	Traes_3DS_561941A6E.1	steroid 3-oxidase
	2.2	Traes_1DS_783351B30.1	--
	1.5	Traes_2AL_9E2B9DDED.1	--
	2	Traes_2DL_178A3F4B9.2	--
	1.5	Traes_7DL_73928596C.1	14-3-3 protein epsilon
	2	Traes_4DL_5F8CEB299.1	beta-D-xylosidase 4
	2.5	Traes_6BL_190F6DF901.3	leucine-rich repeat protein SHOC2
	0	Traes_4DL_C615C8567.1	cytochrome c oxidase assembly protein subunit 16
	1.5	Traes_2BS_F2F72A2B3.1	--
	1.5	Traes_1AS_1D5A1B790.2	mannosyl-oligosaccharide alpha-1,2-mannosidase
	1.5	Traes_5DL_16264667A.1	UDP-glucose:(indol-3-yl)acetate beta-D-glucosyltransferase
	1.2	Traes_2DL_1497E5611.2	--
	2	Traes_1DL_86856070A.1	GDP-mannose transporter
	1.5	Traes_5AL_637B13721.2	--
	2	Traes_2BL_08F554A3C.2	--
	1	Traes_5BL_010E1E2A3.1	--
	1.5	Traes_7DS_EAE3FBECD.2	U4/U6 small nuclear ribonucleoprotein PRP3
	2.5	Traes_7DS_5A117F2B1.2	achilleol B synthase
	1	Traes_3AL_5790EDDE7.2	mitochondrial import inner membrane translocase subunit TIM50
	1.5	Traes_3AS_0E7CB4B4A.2	sentrin-specific protease 1
	1.5	Traes_6BS_E9D7788BF.2	--
	0	Traes_6BL_A5A986E6C.1	26S proteasome regulatory subunit N7
	0.5	Traes_6AS_7B38D5B47.2	myo-inositol-1(or 4)-monophosphatase
	2.5	Traes_5BL_52053A16A.1	HtrA serine peptidase 2
	2	Traes_1DL_97C3D29AF.3	disease resistance protein RPM1
	1.2	Traes_2DL_3C9129432.1	ribosome assembly protein RRB1
	0.5	Traes_1BS_2F6DD776E.1	guanine nucleotide-binding protein subunit alpha, other
	1.5	Traes_3DS_FBEB65A89.1	GTPase
	2	Traes_6DS_3A1EA267A.17	mTERF domain-containing protein, mitochondrial
	1.5	Traes_4BS_959C97F4F.1	--
	1.2	Traes_7AL_2C31E1078.1	disease resistance protein RPM1
	2	Traes_7DL_2F3D6BC0E.2	tyrosine aminotransferase
	1.5	Traes_4BS_8A5DAED26.2	--
	2	Traes_1AL_2116059A5.1	transcription factor Dp-1
	2	Traes_4AS_7218FF406.1	MFS transporter, SP family, solute carrier family 2 (myo-inositol transporter), member 13
	1	Traes_1DL_66B426FE4.2	homeobox protein Meis1
	1.5	Traes_5BL_AA72FE5C0.1	--
	1.5	Traes_2DS_AC2665947.1	--
	2	Traes_6DS_D1FFAD181.1	ATP-dependent DNA helicase PIF1
	2	Traes_2AL_A2F36EF77.2	pentatricopeptide repeat domain-containing protein 1
	0.5	Traes_6BS_CBD931158.4	mTERF domain-containing protein, mitochondrial
	1	Traes_1AL_88C4E33E6.1	LRR receptor-like serine/threonine-protein kinase EFR
	1	Traes_3DL_4A579C5AE.2	4-diphosphocytidyl-2-C-methyl-D-erythritol kinase
	2.5	Traes_4BS_EF4C8D5D3.2	interleukin-1 receptor-associated kinase 4
	0.5	Traes_2BL_C963272C8.1	sucrose synthase
	0.5	Traes_7DL_2F413CF0E.2	copper chaperone
	1.5	Traes_4BL_2DC69E686.2	DNA-directed RNA polymerase, mitochondrial
	0.2	Traes_6DL_F2CADEFF6.1	E3 ubiquitin-protein ligase RNF38/44
	1	Traes_6BS_D8B7C37B0.2	mTERF domain-containing protein, mitochondrial
	1.5	Traes_7BL_B78FAD060.1	glutathione S-transferase
	1.8	Traes_5AL_CDA8056F6.1	prolyl 4-hydroxylase
	2	Traes_2BL_4596D18D8.2	serine carboxypeptidase-like clade I
	1.5	Traes_3AS_F781ED536.1	interleukin-1 receptor-associated kinase 1
	0.5	Traes_4AS_CBEEADECC.1	U4/U6 small nuclear ribonucleoprotein PRP4
	2	Traes_1DL_BB1076D6B.1	speckle-type POZ protein
	2	Traes_2BS_B8F275683.1	--
	2	Traes_7AS_D0A89CDD4.1	--
	1	Traes_2BL_C7C0901D4.2	mRNA (guanine-N7-)-methyltransferase
	1.5	Traes_2AL_1E3B3BC40.2	--
	1.5	Traes_3AL_1E04F9AA3.1	cellulose synthase A
	2	Traes_2AL_28B13CC56.1	pre-mRNA-processing factor 8
	2	Traes_2AL_CB8D989DF.1	interleukin-1 receptor-associated kinase 1
	1.8	Traes_2BS_48B2AB466.1	--
	2.5	Traes_3AL_D96EE6793.1	nuclear pore complex protein Nup85
	1.5	Traes_3DL_1825C1F9E.1	prenylcysteine alpha-carboxyl methylesterase
	2.5	Traes_3AS_865D5DF28.3	--
	0.5	Traes_2AS_537B3DF63.1	E3 ubiquitin-protein ligase RHA2
	1.5	Traes_1AL_A46B5ED96.2	ATP-binding cassette, subfamily G (WHITE), member 2
	1.5	Traes_7DL_8711D31FE.4	ribonuclease T2
	1.5	Traes_6DS_1B409CE95.1	callose synthase
	2	Traes_3AL_143EEBA69.2	E3 ubiquitin-protein ligase BRE1
	0	Traes_3B_A84ED9D40.1	nuclear transcription Y subunit beta
	1.5	Traes_2AS_E022ED09E.1	disease resistance protein RPM1
	2.5	Traes_7AL_96383AEEC.1	glucuronoxylan 4-O-methyltransferase
	1.5	Traes_4AS_6C23CE2D6.1	nuclear cap-binding protein subunit 1
	2	Traes_2BL_408E05890.1	E3 ubiquitin-protein ligase RNF144
	2	Traes_6DS_8C1FC076E.1	U1 small nuclear ribonucleoprotein C
	1.5	Traes_4BL_5AF7ACF03.2	--
	1	Traes_1DL_23FE5BB47.2	general transcription factor 3C polypeptide 5 (transcription factor C subunit 1)
	2	Traes_7BS_95A9DBA2D.1	adenylyltransferase and sulfurtransferase
	2	Traes_2AL_F68F429C1.1	DNA excision repair protein ERCC-6
	2.5	Traes_1BL_65D58F997.6	--
	2.5	Traes_1AL_EAA953F21.2	flavonol synthase
	2	Traes_1AL_D8BA4FB5D.1	histone-lysine N-methyltransferase SETD3
	2.2	Traes_1DL_47D137A08.1	1-phosphatidylinositol-4-phosphate 5-kinase
	1.5	Traes_1DL_6776BA925.2	ribonuclease HI
	1	Traes_2AL_229EBA080.1	peroxidase
	1.5	Traes_6AL_DDE12F8D0.1	leucine-rich repeat protein SHOC2
	1.5	Traes_4AL_80727DCA6.1	glutathione S-transferase
	2	Traes_3AL_F267E868C.2	enhancer of mRNA-decapping protein 4
	1.5	Traes_6AS_912DA59AA.1	probable phosphoglycerate mutase
	2	Traes_5DS_CAD6C9339.2	interleukin-1 receptor-associated kinase 1
	1.5	Traes_5AL_D4717382C.1	diphthamide biosynthesis protein 4
	1.5	Traes_2DL_1F24E4FF8.1	--
	1	Traes_5DS_BDE53BB5F.1	pumilio RNA-binding family
	2	Traes_3AL_20BAF937E.2	--
	1.2	Traes_1AL_1A1E3798D.1	--
	2	Traes_6BL_F8C4F363B.1	--
	2.5	Traes_1AL_F12A4B1F5.4	--
	1	Traes_6BS_812D3A692.1	mTERF domain-containing protein, mitochondrial
	0	Traes_6DL_5CB149734.2	abnormal spindle-like microcephaly-associated protein
	1	Traes_2DS_D014BDCA2.1	pectinesterase
	1.5	Traes_1DL_3873CDB4B.2	alpha-1,4-galacturonosyltransferase
	2.5	Traes_1BL_0720AD5F5.1	Ras-related protein Rab-18
	1.5	Traes_6BL_E14604962.3	polyadenylate-binding protein 2
	2	Traes_2BL_E76C6D6AD.1	--
	0.2	Traes_2AS_DACE53B24.2	(S)-2-hydroxy-acid oxidase
	2	Traes_4BL_65AB61144.1	UDP-glucuronate decarboxylase
	0	Traes_5DL_B3C8DD9AA.1	--
	2	Traes_6DL_29D1C52F2.1	--
	2	Traes_7BL_4437E5002.2	E3 ubiquitin-protein ligase KEG
	2	Traes_5DL_D9C09E026.3	--
	1.5	Traes_1BS_DC30245241.2	6-phosphofructokinase 1
	2	Traes_5DL_89E7C5C37.1	CTD small phosphatase-like protein 2
	1.5	Traes_2BL_ED0C079ED.1	--
	2	Traes_2DS_C3EF31AB4.3	protein phosphatase 1 regulatory subunit 7
	2	Traes_6BL_C8071DBCF.2	--
	2	Traes_4BL_B5A5FB2EB.2	tyrosyl-DNA phosphodiesterase 2
	0	Traes_2DS_F438957FE.1	leucine-rich PPR motif-containing protein, mitochondrial
	1	Traes_1AL_7FE24229E.2	protein KRI1
	2	Traes_5BL_81FD6E89B.9	homogentisate solanesyltransferase
	2	Traes_1BL_29B3ECD16.1	--
	1.5	Traes_6DL_4BEB993D5.2	--
	2	Traes_4AL_9F373E931.1	--
	2	Traes_3DL_1DA454A9F.1	--
	1	Traes_1BL_A151C620A.5	--
	1	Traes_2DL_2FB11E18C.1	interleukin-1 receptor-associated kinase 1
	2	Traes_6DL_59537CE7A.2	legumain
	2.5	Traes_5BL_756B1DFCF.7	5'-AMP-activated protein kinase, catalytic alpha subunit
	0.5	Traes_1AS_59404C639.1	--
	1.5	Traes_1DS_BB3A94D5B.2	tricin synthase
	2	Traes_5DL_0924913F8.1	polyadenylate-binding protein
	2	Traes_2AL_DFB829624.2	solute carrier family 15 (peptide/histidine transporter), member 3/4
	2.5	Traes_2BL_49CBDC51B.1	interleukin-1 receptor-associated kinase 1
	1.5	Traes_2BL_138A6C401.1	cysteamine dioxygenase
	1	Traes_7AL_E92ABFC84.1	--
	1.5	Traes_5BS_242B8923E.3	INO80 complex subunit B
	2	Traes_4AL_2AF93C16B1.1	--
	1.2	Traes_2DL_3D4B9145A.1	--
	2	Traes_1DS_0E91E3E72.2	heparan-alpha-glucosaminide N-acetyltransferase
	2.5	Traes_2AS_B2BD6AD3C.2	leucine-rich PPR motif-containing protein, mitochondrial
	2.5	Traes_4BS_8C6ADCEDA.1	--
	1.5	Traes_5AS_A977349961.2	F-box and leucine-rich repeat protein 2/20
	1.2	Traes_1DL_BDDCF33B3.1	--
	1	Traes_2BS_88803DFE6.2	solute carrier family 15 (peptide/histidine transporter), member 3/4
	0	Traes_1DL_41E7D2C4E.1	alcohol dehydrogenase class-P
	0.5	Traes_5AS_9DC956868.2	molecular chaperone DnaJ
	2	Traes_5AL_3976F401A.1	--
	1	Traes_3AL_DDBCC6696.2	solute carrier family 15 (peptide/histidine transporter), member 3/4
	1.5	Traes_6AS_A4F79095B.1	RNA polymerase I-specific transcription initiation factor RRN3
	0	Traes_7AL_955F54182.1	KUP system potassium uptake protein
	2.5	Traes_1BL_471B5805D.2	myosin heavy chain
	1	Traes_5AL_2C26B1FFC.1	E3 ubiquitin-protein ligase RNF38/44
	2	Traes_2BS_A87D49831.1	pyruvate dehydrogenase kinase 2/3/4
	1	Traes_4BS_1BAD49C4E.2	splicing factor U2AF 65 kDa subunit
	1.8	Traes_7BL_AA4AFFA61.1	E3 ubiquitin-protein ligase NEDD4
	0	Traes_7DS_619769289.1	centromeric protein E
	1.8	Traes_4AL_2A5DEA0BB.1	--
	2	Traes_7AS_C24C1C15A.1	aquaporin NIP
	0.5	Traes_3AS_137C2C208.3	--
	1.5	Traes_2DS_9520F146E.1	L-ascorbate oxidase
	0	Traes_6AL_686E9F639.1	magnesium/proton exchanger
	0	Traes_4BL_CF3E56FCD.1	targeting protein for Xklp2
	2	Traes_5AL_E8CAA9375.1	Ras-related protein Rab-11A
	2	Traes_3DL_7EF7BC2E0.1	oligosaccharide translocation protein RFT1
	1	Traes_2BL_171ABA978.1	ferredoxin
	1.5	Traes_4DS_717A43204.1	interleukin-1 receptor-associated kinase 1
miR1439	2.2	Traes_6BL_C8071DBCF.2	--
	1.5	Traes_1BL_9994DD10C.1	splicing factor 3B subunit 4
	2.5	Traes_3AL_B0A5AA3FD.1	heart-and neural crest derivatives-expressed protein 2
	2	Traes_7AL_5E1320A2B.1	--
	1.5	Traes_5AL_D4717382C.1	diphthamide biosynthesis protein 4
	0.8	Traes_2BL_49CBDC51B.1	interleukin-1 receptor-associated kinase 1
	2	Traes_2DL_9E678AFFB.1	homeobox-leucine zipper protein
	2.5	Traes_4AL_2A5DEA0BB.1	--
	1.5	Traes_2AL_D2CC35E59.2	protein phosphatase methylesterase 1
	1.8	Traes_6AL_F264149FA.1	--
	1.5	Traes_3AL_9D6C25FCD.1	interleukin-1 receptor-associated kinase 4
	1.5	Traes_2DS_D014BDCA2.1	pectinesterase
	2	Traes_5BS_06F7D0060.1	--
	2	Traes_6DL_4EB3C5C2E.1	stromal membrane-associated protein
	2.5	Traes_4AS_6C23CE2D6.1	nuclear cap-binding protein subunit 1
	1.5	Traes_2AS_A84BCA3A7.2	--
	0.5	Traes_2AL_F68F429C1.1	DNA excision repair protein ERCC-6
	2.5	Traes_2BL_4BFCCF562.1	--
	1	Traes_3AL_30294D0A5.1	glycerol-3-phosphate dehydrogenase (NAD+)
	1.8	Traes_2DL_1497E5611.2	--
	0.2	Traes_4BL_B5A5FB2EB.2	tyrosyl-DNA phosphodiesterase 2
	0.5	Traes_5BL_1F9DF8D94.1	--
	1.8	Traes_1AL_BE7D7FE75.1	--
	1.5	Traes_4DL_905A85957.3	--
	1	Traes_5AL_5AF616715.1	--
	2.5	Traes_6DL_585DD5701.1	--
	2	Traes_4DL_C95A997A8.1	--
	2	Traes_1DL_D9BA83221.2	ABA responsive element binding factor
	2	Traes_4DL_455113C391.1	isoleucyl-tRNA synthetase
	0.8	Traes_2BL_928000A2B.2	E3 ubiquitin-protein ligase HERC4
	1.5	Traes_7DL_5B4B21BA0.1	galacturan 1,4-alpha-galacturonidase
	2	Traes_1DL_47D137A08.1	1-phosphatidylinositol-4-phosphate 5-kinase
	2	Traes_6DL_4EB3C5C2E1.1	stromal membrane-associated protein
	2	Traes_5DL_F2EB5A102.1	palmitoyltransferase ZDHHC9/14/18
	2.5	Traes_4BS_EF4C8D5D3.2	interleukin-1 receptor-associated kinase 4
	1.5	Traes_3DL_864BD44EB.1	--
	1.5	Traes_6BL_8483713F6.1	4-coumarate--CoA ligase
	1.2	Traes_2BS_C9C1928B7.5	--
	1.5	Traes_4BL_5AF7ACF03.2	--
	2	Traes_1BL_1B9EB3752.1	--
	2	Traes_4AL_A99729A05.2	FUS-interacting serine-arginine-rich protein 1
	1.5	Traes_2DL_1F24E4FF8.1	--
	2	Traes_5DL_DFE47E78E.1	--
	1.2	Traes_5BL_C83F945F6.2	--
	2.5	Traes_3AL_D96EE6793.1	nuclear pore complex protein Nup85
	0.5	Traes_4AL_D971AF25D.2	cytosolic prostaglandin-E synthase
	2.5	Traes_5AL_236DA3851.1	--
	2	Traes_5AS_98B9EF5B2.1	--
	1.2	Traes_4DL_CC7FC2CE3.1	leucine-rich PPR motif-containing protein, mitochondrial
	2	Traes_1AL_A7100841D.2	--
	1.5	Traes_5AL_38B610793.2	pre-mRNA-processing factor 8
	2	Traes_3DL_905C6A6BC.1	--
	2	Traes_1AL_830763C49.1	solute carrier family 15 (peptide/histidine transporter), member 3/4
	0.5	Traes_2DL_5C445EE47.1	--
	1.5	Traes_5AL_9F207C3A8.1	formyltetrahydrofolate deformylase
	2	Traes_2DL_50EFF28FF.1	--
[truncated: 2,782 more rows]
