# Supplementary material for: Identification and Temporal Expression Analysis of Conserved and Novel MicroRNAs in the Leaves of Winter Wheat Grown in the Field
Source: Front Genet. 2019 Sep 4;10:779. doi: 10.3389/fgene.2019.00779 (PMC6737308; doi:10.3389/fgene.2019.00779)
Supplement: Supplementary file 8 [file Table_8.xlsx]

## Sheet: novel and putative miRNAs
Supplemental Table S8 Predicted target genes of wheat novel and putative miRNAs
miRNA	Score	Targtet dene ID	target gene anotation
novel_mir_30	2	Traes_7BS_2EC93A7D7.1	ATP-binding cassette, subfamily C (CFTR/MRP), member 2
	2	Traes_7DS_FCD57EBB0.2	ATP-binding cassette, subfamily C (CFTR/MRP), member 2
	2	Traes_7AS_86392D8DF.2	ATP-binding cassette, subfamily C (CFTR/MRP), member 2
	2	Traes_3AL_9E170BA39.2	leucine-rich PPR motif-containing protein, mitochondrial
	2	Traes_7BS_4CB71F5D3.1	ATP-binding cassette, subfamily C (CFTR/MRP), member 2
	2	Traes_7DS_98D437BAD.1	ATP-binding cassette, subfamily C (CFTR/MRP), member 2
	2	Traes_3DL_75BB42AD6.5	leucine-rich PPR motif-containing protein, mitochondrial
	1.5	Traes_7BL_F24B358B7.1	MFS transporter, OPA family, solute carrier family 37 (glycerol-3-phosphate transporter), member 1/2
	2	Traes_7BS_55471F0FB.1	ATP-binding cassette, subfamily C (CFTR/MRP), member 2
	2.5	Traes_3AL_9876A7BC5.1	ribosomal RNA-processing protein 12
novel_mir_127	1.8	Traes_5DL_97C49B4FC.1	--
	2	Traes_2BL_6F116D0CA.1	UDP-glucosyl transferase 73C
	2	Traes_1DS_300AB5CC9.2	nuclear receptor co-repressor 1
	2	Traes_1BS_282C4747C.2	nuclear receptor co-repressor 1
	2	Traes_1AS_34B6145E5.3	nuclear receptor co-repressor 1
novel_mir_128	2.5	Traes_2DS_DD775CE3B.1	LRR receptor-like serine/threonine-protein kinase FLS2
novel_mir_193	2.2	Traes_5DS_9FEBEFFA9.1	heparanase 1
	2.5	Traes_2DL_776B9B786.1	E3 ubiquitin-protein ligase RNF13
	2.5	Traes_2BL_8C69E82F0.2	E3 ubiquitin-protein ligase RNF13
	2.2	Traes_5AS_92A2909AB.2	heparanase 1
	2.2	Traes_5BS_34EDA6E3A.2	heparanase 1
novel_mir_259	1.8	Traes_5DL_E1563D76B.2	solute carrier family 39 (zinc transporter), member 1/2/3
	2.2	Traes_4BL_D30754659.1	--
	2.5	Traes_1BL_49F8F7A44.2	MFS transporter, SP family, solute carrier family 2 (facilitated glucose transporter), member 8
	2.5	Traes_1DL_3EE5BBEA1.1	senescence-induced receptor-like serine/threonine-protein kinase
	1.8	Traes_4AL_9839E5802.1	--
	1.5	TRAES3BF044200290CFD_t1	golgi-specific brefeldin A-resistance guanine nucleotide exchange factor 1
	2.5	Traes_1BL_59C620E19.2	senescence-induced receptor-like serine/threonine-protein kinase
	1.8	Traes_3DL_267D29D44.1	disease resistance protein RPM1
novel_mir_364	2.5	Traes_6DS_D8603CBD2.1	disease resistance protein RPM1
	2.2	Traes_3DL_BF28A470D.1	atypical dual specificity phosphatase
	2.5	Traes_4BL_719B183D9.1	DNA helicase INO80
	2.2	TRAES3BF128500120CFD_t1	atypical dual specificity phosphatase
	2.5	Traes_4DL_402A13792.2	DNA helicase INO80
	2.5	Traes_4AS_0D3D9D589.1	DNA helicase INO80
novel_mir_381	2.5	Traes_4AS_DD16F89E7.1	--
	2	Traes_7BL_56B80DB6F.1	meiotic recombination protein SPO11
	1.5	Traes_3AS_C8D7B3921.2	--
	2	Traes_2BL_BC038628B.1	heat shock transcription factor, other eukaryote
	2.5	Traes_5AL_2D51123F6.1	--
	2.5	Traes_2DS_82116F38F.1	p70 ribosomal S6 kinase
	1	Traes_4AS_144A4BFD1.1	replication factor A1
	1.8	Traes_5AL_FB8A3A1BB.2	--
	2.2	Traes_3DS_DEE900F71.1	--
	2	Traes_7BL_00605285D.2	--
	1.5	Traes_2DS_BCB7C3C11.1	mTERF domain-containing protein, mitochondrial
	1.5	Traes_1AS_7AB089C23.1	--
	2.5	Traes_4DS_FB5C2E77A.4	lysine-specific demethylase 3
	2	Traes_5DL_F75860E0B.1	cell division protease FtsH
	2	Traes_4BL_379DA1919.1	threonine aldolase
	1.5	Traes_4DL_253F18B56.1	HSP20 family protein
	1.5	Traes_1AS_6C2BED457.1	--
	1.5	Traes_5DS_0B17FFD55.1	ethylene-insensitive protein 3
	2	Traes_4AS_9B8749CEB.2	ribonucleases P/MRP protein subunit RPP25
	1.8	Traes_2AL_BDB97A5BA.1	9-cis-epoxycarotenoid dioxygenase
	2	Traes_3DS_C894F7EF1.1	Ras-related protein Rab-1A
	1.5	Traes_6BS_8EB9E6EC7.2	disease resistance protein RPM1
	2	Traes_7DL_D2F7ABECE.1	--
novel_mir_553	1.5	Traes_6AS_F7C50B3FF.1	leucoanthocyanidin dioxygenase
novel_mir_639	2	Traes_2AL_563E4E901.1	premnaspirodiene oxygenase
	2.5	Traes_1AS_3A3C86D64.1	interleukin-1 receptor-associated kinase 4
novel_mir_641	2	Traes_1DL_DC61DA172.1	cytochrome P450, family 26, subfamily A
	2.5	Traes_6BS_F87437638.3	--
	2	Traes_7BL_002EE3EC3.1	--
	2	Traes_7DL_85A6FC0F2.1	--
	2	Traes_5BL_45662533A.1	--
	2.5	Traes_2AS_DACE53B24.2	(S)-2-hydroxy-acid oxidase
	2.5	Traes_3AL_DDBCC6696.2	solute carrier family 15 (peptide/histidine transporter), member 3/4
	1.5	Traes_6AS_7B38D5B47.2	myo-inositol-1(or 4)-monophosphatase
	2.5	Traes_4AL_A99729A05.2	FUS-interacting serine-arginine-rich protein 1
	2.5	Traes_6DL_38B41C198.1	--
	2.5	Traes_2AL_A807B3759.2	cyclopropane-fatty-acyl-phospholipid synthase
	2	Traes_6AL_3FB51E7F6.1	ATP-dependent Clp protease ATP-binding subunit ClpX
	2.5	Traes_5AS_A977349961.2	F-box and leucine-rich repeat protein 2/20
	2.2	Traes_2BS_48B2AB466.1	--
	2.5	Traes_2DS_9BCFF2B80.1	--
	2	Traes_2AL_79AD48080.1	heparan-alpha-glucosaminide N-acetyltransferase
	2.5	Traes_7DL_EFB19C389.1	--
	2	Traes_6BL_9E43B8FCD.1	--
	2.5	Traes_2DS_C8CC2F963.1	ATP-dependent RNA helicase DDX21
	2.5	Traes_1BS_2F6DD776E.1	guanine nucleotide-binding protein subunit alpha, other
	2.5	Traes_4BL_CF3E56FCD.1	targeting protein for Xklp2
	2.5	Traes_4DL_DB6E7EA54.1	DNA excision repair protein ERCC-4
	1.5	Traes_3DL_858101A78.2	DNA-directed RNA polymerase III subunit RPC4
	2.5	Traes_3DS_561941A6E.1	steroid 3-oxidase
	2.5	Traes_5DL_A061F2DD6.1	abnormal spindle-like microcephaly-associated protein
	2.5	Traes_7DL_ACACA513D.2	transcriptional repressor NF-X1
	2.5	Traes_4AL_1C6E2A6BF.1	ERO1-like protein alpha
	2.5	Traes_5AL_1311205EE.2	sacsin
	1.5	Traes_1DL_05B4AB2E3.1	caffeoylshikimate esterase
	2.5	Traes_2AL_EE1350B36.1	mTERF domain-containing protein, mitochondrial
	2.5	Traes_2BS_879851C74.1	annexin A7/11
	2.5	Traes_2DL_3C9129432.1	ribosome assembly protein RRB1
	1.5	Traes_5AS_9DC956868.2	molecular chaperone DnaJ
	1.5	Traes_6DS_016F70618.2	--
	1.5	Traes_3AL_EAADE1825.1	--
	2.5	Traes_4DL_C615C8567.1	cytochrome c oxidase assembly protein subunit 16
	2.5	Traes_6BL_A5A986E6C.1	26S proteasome regulatory subunit N7
	2	Traes_2DL_7D7B1B55D.1	1-deoxy-D-xylulose-5-phosphate synthase
	2	Traes_2BL_C7C0901D4.2	mRNA (guanine-N7-)-methyltransferase
	2.5	Traes_5DL_B3C8DD9AA.1	--
	2	Traes_4BS_1BAD49C4E.2	splicing factor U2AF 65 kDa subunit
	2.5	Traes_6DL_F2CADEFF6.1	E3 ubiquitin-protein ligase RNF38/44
	2.5	Traes_6BS_E9D7788BF.2	--
	2.5	Traes_7AL_955F54182.1	KUP system potassium uptake protein
	2.5	Traes_6AL_686E9F639.1	magnesium/proton exchanger
	1.2	Traes_2BS_F4DF1DB26.2	transcription elongation factor B, polypeptide 2
	2.5	Traes_7DL_2F413CF0E.2	copper chaperone
	2.5	Traes_1DS_464EBC131.2	LRR receptor-like serine/threonine-protein kinase FLS2
	2.5	Traes_4AS_049576319.2	cytochrome c oxidase assembly protein subunit 16
	2.5	Traes_4DS_990D31BB1.6	elongation factor 1-alpha
	2.5	Traes_1DL_9FE4D295D.2	--
	2	Traes_1BL_A151C620A.5	--
	1.5	Traes_1AL_43F02DB49.1	dolichyl-diphosphooligosaccharide--protein glycosyltransferase
	2.5	Traes_2DS_F438957FE.1	leucine-rich PPR motif-containing protein, mitochondrial
	1.5	Traes_2AS_537B3DF63.1	E3 ubiquitin-protein ligase RHA2
	2	Traes_5BL_9010C082A.1	hydroquinone glucosyltransferase
	1.5	Traes_1AS_59404C639.1	--
	2.5	Traes_1DL_41E7D2C4E.1	alcohol dehydrogenase class-P
	2.5	Traes_7DS_CAB1BF6AC.1	--
	1.8	Traes_1AL_88C4E33E6.1	LRR receptor-like serine/threonine-protein kinase EFR
	2.5	Traes_1BS_4E905855D.1	small subunit ribosomal protein S3Ae
	2	Traes_2AS_D38A5E045.1	amidase
	1.8	Traes_7AL_96383AEEC.1	glucuronoxylan 4-O-methyltransferase
	1.8	Traes_3AS_5875028F9.3	ATP-dependent RNA helicase DDX5/DBP2
	2.5	Traes_1DL_F9213AB33.1	KDEL-tailed cysteine endopeptidase
	1.5	Traes_1DL_66B426FE4.2	homeobox protein Meis1
	2.5	Traes_6DL_5CB149734.2	abnormal spindle-like microcephaly-associated protein
	2.5	Traes_7DS_619769289.1	centromeric protein E
	2.5	Traes_3B_A84ED9D40.1	nuclear transcription Y subunit beta
	1.5	Traes_5AL_3976F401A.1	--
novel_mir_652	1.8	Traes_5AL_FB8A3A1BB.2	--
	1.5	Traes_1AS_7AB089C23.1	--
	1.5	Traes_2DS_BCB7C3C11.1	mTERF domain-containing protein, mitochondrial
	1.5	Traes_4DL_253F18B56.1	HSP20 family protein
	2	Traes_2AL_BDB97A5BA.1	9-cis-epoxycarotenoid dioxygenase
	2.2	Traes_2BL_BC038628B.1	heat shock transcription factor, other eukaryote
	2.5	Traes_7BL_FF48B06EB.1	ent-isokaurene C2-hydroxylase
	1.5	Traes_3AS_6F9355B92.1	steroid 3-oxidase
	1	Traes_4AS_144A4BFD1.1	replication factor A1
	1.5	Traes_5DS_0B17FFD55.1	ethylene-insensitive protein 3
	2.5	Traes_3DS_DEE900F71.1	--
	2	Traes_7BL_56B80DB6F.1	meiotic recombination protein SPO11
	2	Traes_4AS_9B8749CEB.2	ribonucleases P/MRP protein subunit RPP25
	2.5	Traes_5AL_2D51123F6.1	--
	1.5	Traes_1AS_6C2BED457.1	--
	2.5	Traes_4DS_FB5C2E77A.4	lysine-specific demethylase 3
	2	Traes_4BL_379DA1919.1	threonine aldolase
	2	Traes_3DS_C894F7EF1.1	Ras-related protein Rab-1A
	2	Traes_5DL_F75860E0B.1	cell division protease FtsH
novel_mir_669	2	Traes_2AL_5B4F79969.1	ubiquitin carboxyl-terminal hydrolase 36/42
	0.5	Traes_7AS_F0E3A819F.1	homeobox-leucine zipper protein
novel_mir_678	0	Traes_6BS_0C44EFEF0.1	--
	2	Traes_1AL_ED72E167A.2	alpha-galactosidase
	0	Traes_4AS_144A4BFD1.1	replication factor A1
	2.2	Traes_2AL_B854D3399.1	V-type H+-transporting ATPase subunit a
	0	Traes_1BL_CADC54213.1	--
	2.5	Traes_7DS_AD59A2CCB.1	protein brassinosteroid insensitive 1
	0	Traes_2BL_368051B83.1	--
	0.5	Traes_3AL_52107CB7C.1	--
	0	Traes_3DL_92627E57C.1	--
	0	Traes_2AL_45601830C.1	heterogeneous nuclear ribonucleoprotein G
	0	Traes_6BS_EC434EA27.1	uncharacterized protein
	0	Traes_2BS_79D69ADD4.3	leucine-rich PPR motif-containing protein, mitochondrial
	0.5	Traes_4DS_E8D583055.1	threonine dehydratase
	0	Traes_1BS_17D5F6097.1	oligopeptidase A
	0	Traes_4AL_24841C1E1.1	myb proto-oncogene protein, plant
	0	Traes_1BS_F781950DB.1	disease resistance protein RPM1
	0	Traes_7BS_D95A42867.1	--
	2	Traes_1BL_0D7C2EB91.1	alpha-galactosidase
	1	Traes_4DS_747D5D3CA.1	small subunit ribosomal protein S5
	0	Traes_4AS_3191711DF.1	kinesin family member 11
	1	Traes_7BS_C3E89D1A7.2	type II pantothenate kinase
	0	Traes_2AL_D2A088242.1	nuclear autoantigenic sperm protein
	0	Traes_1BS_8B34D0A6D.2	U3 small nucleolar RNA-associated protein 20
	0.8	Traes_6DL_FBA7EF4BD.1	--
	2.5	Traes_7DS_AD59A2CCB1.1	protein brassinosteroid insensitive 1
	0	Traes_7AL_5D538FD32.1	--
	1.2	Traes_1BL_BEB9B5EF3.1	myosin V
	2	Traes_2BS_5D91AE77C.6	diphosphomevalonate decarboxylase
	1.8	Traes_6BS_9C3CCC2C1.2	--
	0	Traes_6AS_15C1E6F18.2	mTERF domain-containing protein, mitochondrial
	0	Traes_3AL_863ECA3A4.1	transcription initiation factor TFIID subunit 7
	2	Traes_5AS_22891B92F.1	alpha-galactosidase
	0	Traes_5BS_C46781248.1	WRKY transcription factor 33
	0.8	Traes_2AS_E78624195.1	--
	0.5	Traes_5AL_CC12189FF.1	elongation factor 1-alpha
	0.2	Traes_7DL_71DA2B98D.1	lysine-specific histone demethylase 1A
	0	Traes_2AL_349EF5B5D.2	palmitoyltransferase
	2	Traes_1DL_D5F3DA85C.1	alpha-galactosidase
	0	Traes_4AS_97A5D8F2B.2	--
	2	Traes_5DS_C9357B54F.1	alpha-galactosidase
	0	Traes_5BL_8DE6D4316.2	interleukin-1 receptor-associated kinase 4
novel_mir_692	0	Traes_3DL_3FD1C807F.2	integrator complex subunit 9
	0	Traes_3B_E1131EA03.1	integrator complex subunit 9
	2.2	Traes_4AS_B4A3986E6.1	glycerol-3-phosphate acyltransferase
	2.5	Traes_5BS_24983A82D.1	--
	0	Traes_3AL_BA847A16F.1	integrator complex subunit 9
	2	Traes_6AL_81EB49F43.1	--
novel_mir_810	2.5	Traes_7AS_92A4BC187.1	sphinganine C4-monooxygenase
	2.5	Traes_7AL_B454397E7.1	--
	2.5	Traes_2AL_A634C94CA.1	golgi-specific brefeldin A-resistance guanine nucleotide exchange factor 1
	2.5	Traes_2BL_87AA8B551.1	golgi-specific brefeldin A-resistance guanine nucleotide exchange factor 1
	2.5	Traes_5AL_A751CA7E5.1	nucleoside-diphosphate kinase
	2.5	Traes_1DL_BA7674D7C.1	alcohol dehydrogenase class-P
novel_mir_866	1.5	Traes_5AL_929DDD42C.2	zinc finger SWIM domain-containing protein 3
	2	Traes_5DL_91C40741C.1	ATP-dependent Clp protease ATP-binding subunit ClpC
novel_mir_1009	1	Traes_6BS_8EB9E6EC7.2	disease resistance protein RPM1
	2.2	Traes_2DS_BCB7C3C11.1	mTERF domain-containing protein, mitochondrial
	2	Traes_3AS_086BAC20B.2	ribonuclease III family protein
	2	Traes_2AL_BD550258E.1	programmed cell death protein 4
	1.8	Traes_5DL_F75860E0B.1	cell division protease FtsH
	1.8	Traes_5AL_6946D4AF8.3	interleukin-1 receptor-associated kinase 1
	2.5	Traes_3DS_8C54D3113.1	--
	2	Traes_4DL_253F18B56.1	HSP20 family protein
	2	Traes_5BS_AE8F8B4E8.1	--
	1.5	Traes_1AL_3F65EE35A.1	tetraspanin-5
	1	Traes_1AS_6C2BED457.1	--
	1	Traes_3DS_DEE900F71.1	--
	2	Traes_6DS_3A1EA267A.17	mTERF domain-containing protein, mitochondrial
	1	Traes_6AL_C13753B31.1	myb proto-oncogene protein, plant
	2	Traes_2AL_3384AED5F.1	signal peptidase complex subunit 2
	2	Traes_5AL_2D51123F6.1	--
	1.5	Traes_2AL_43A6ED87C.1	heat shock transcription factor, other eukaryote
	1.8	Traes_3AS_6F9355B92.1	steroid 3-oxidase
	2.2	Traes_6BL_304092BEE.1	callose synthase
	1	Traes_1AS_7AB089C23.1	--
	2.5	Traes_4BL_379DA1919.1	threonine aldolase
	1	Traes_7BL_56B80DB6F.1	meiotic recombination protein SPO11
	2.5	Traes_2AL_CECF497D2.2	peptide chain release factor subunit 1
	1.8	Traes_2BL_BC038628B.1	heat shock transcription factor, other eukaryote
	2	Traes_6DL_9CFB8853B.1	callose synthase
novel_mir_1154	2.5	Traes_6BS_A2D3DBE92.2	isochorismate synthase / 2-succinyl-5-enolpyruvyl-6-hydroxy-3-cyclohexene-1-carboxylate synthase / 2-succinyl-6-hydroxy-2,4-cyclohexadiene-1-carboxylate synthase / O-succinylbenzoate synthase
	2.5	Traes_6DL_473ECE2BE.2	isochorismate synthase / 2-succinyl-5-enolpyruvyl-6-hydroxy-3-cyclohexene-1-carboxylate synthase / 2-succinyl-6-hydroxy-2,4-cyclohexadiene-1-carboxylate synthase / O-succinylbenzoate synthase
	2.5	Traes_7AS_B2DC3787B.1	zinc finger protein CONSTANS
	2.2	Traes_6DL_EC96129AF.3	phospholipid:diacylglycerol acyltransferase
novel_mir_1255	2.2	Traes_2DL_9F24A54AF.1	translation initiation factor 4G
	2.2	Traes_2AL_57DF7CC48.1	translation initiation factor 4G
	2.2	Traes_2BL_E473B6F6E.1	translation initiation factor 4G
	2	Traes_6BL_65F472130.1	cytochrome b-561
	2.5	Traes_3AL_6B2120DEC.2	beta-glucosidase
novel_mir_1304	2	Traes_6BL_30ACE5681.5	mTERF domain-containing protein, mitochondrial
	2	Traes_4DL_1DEE700BD.1	--
novel_mir_1322	2	Traes_2DL_3C62DC707.1	myb proto-oncogene protein, plant
	2.5	Traes_7AS_ECBB6F731.1	superoxide dismutase, Fe-Mn family
	1.8	Traes_5BL_2AB412F7D.1	GC-rich sequence DNA-binding factor
	1.8	Traes_4AL_61D475595.4	GC-rich sequence DNA-binding factor
	1.8	Traes_5DL_1B761B6EE.4	GC-rich sequence DNA-binding factor
	2.2	Traes_2BL_88BBF0441.1	myb proto-oncogene protein, plant
	2.5	Traes_4AL_433F090E0.1	superoxide dismutase, Fe-Mn family
	2.5	Traes_5DL_A027D96A6.1	indole-3-pyruvate monooxygenase
	1	Traes_4BL_496C951E5.3	--
	2	Traes_2DL_C24C77B7E.1	myb proto-oncogene protein, plant
	2	Traes_2BL_5AD9EF31F.1	myb proto-oncogene protein, plant
	2.2	Traes_2BL_C843D1851.1	myb proto-oncogene protein, plant
	2.5	Traes_2AL_E5B3B79F7.1	myb proto-oncogene protein, plant
	2	Traes_4DS_6D029A40F.1	--
	2	Traes_2DL_54D11D5E7.1	myb proto-oncogene protein, plant
	2.5	Traes_2AL_1D7D3D0DE.1	myb proto-oncogene protein, plant
	2.5	Traes_2BL_26146B0C8.1	peroxygenase
	2	Traes_2AL_FBC0ED0EE.2	myb proto-oncogene protein, plant
	2	Traes_2BL_D50CC6A1D1.1	myb proto-oncogene protein, plant
	2	Traes_2AL_B01AE830F.1	myb proto-oncogene protein, plant
	2	Traes_2BL_D50CC6A1D.1	myb proto-oncogene protein, plant
	1.5	Traes_7AL_6403E0CED.2	--
novel_mir_1401	2.5	Traes_3DL_D13566621.1	polyneuridine-aldehyde esterase
	2	Traes_4BL_165838228.1	solute carrier family 32 (vesicular inhibitory amino acid transporter)
	2	Traes_2DL_E8EAFE075.1	--
	1.2	Traes_4BL_87A244E73.2	--
	2	Traes_4BL_CCCFCB411.1	--
	2	Traes_1BS_47D29F0A5.3	DnaJ homolog subfamily B member 9
	0	Traes_2DS_9BCFF2B80.1	--
	2.5	Traes_1BL_E2E2ED3FE.1	DnaJ homolog subfamily C member 17
	1	Traes_3AL_C0B6CE358.1	F-box and leucine-rich repeat protein 2/20
	1.5	Traes_4BS_718B422BF.2	cysteine synthase A
	0.5	Traes_1AS_59404C639.1	--
	1.5	Traes_5BL_8FFD203BD.1	ubiquitin-like protein Nedd8
	2	Traes_1BL_63F0F0FAA.1	--
	0.5	Traes_2AS_607E72B1A.1	2,4-dihydroxy-1,4-benzoxazin-3-one-glucoside dioxygenase
	0.5	Traes_4DS_FEAA10316.1	DELLA protein
	0.5	Traes_6AS_CF374995B.1	Xaa-Pro dipeptidase
	1	Traes_3B_A84ED9D40.1	nuclear transcription Y subunit beta
	1	Traes_7AL_4E998FAC1.1	--
	1	Traes_6BS_FDDC181D1.1	20S proteasome subunit alpha 6
	0	Traes_1BL_65D58F997.6	--
	0	Traes_1DL_DDCF517E1.1	--
	1.5	Traes_2AS_B2BD6AD3C.2	leucine-rich PPR motif-containing protein, mitochondrial
	1.2	Traes_1DL_EE867865C.1	--
	1.5	Traes_7AL_FB86BD67D.2	pheophorbidase
	2.2	Traes_5BL_014EC616D.1	ATP-dependent RNA helicase DDX23/PRP28
	2	Traes_1BS_D81E948D7.1	histone acetyltransferase
	0	Traes_3DL_838442186.1	U3 small nucleolar RNA-associated protein 11
	1.5	Traes_2AS_DACE53B24.2	(S)-2-hydroxy-acid oxidase
	0	Traes_7DL_1D591BE1B.1	E3 ubiquitin-protein ligase Arkadia
	0	Traes_3DL_3E215D878.2	delta-1-pyrroline-5-carboxylate synthetase
	1.8	Traes_5BL_09F92E35C.1	E3 SUMO-protein ligase PIAS1
	0.5	Traes_6BS_D8B7C37B0.2	mTERF domain-containing protein, mitochondrial
	2	Traes_5DS_BA8613E74.1	--
	0	Traes_7BL_002EE3EC3.1	--
	1	Traes_2DL_3C9129432.1	ribosome assembly protein RRB1
	1	Traes_2AS_B365561A9.2	--
	2	Traes_6DL_A95013422.2	sn1-specific diacylglycerol lipase
	1	Traes_4AS_5EDE61425.2	--
	0.2	Traes_4DL_9F7C8C343.1	sucrose synthase
	0	Traes_6AS_7EC900F2F.1	LRR receptor-like serine/threonine-protein kinase FLS2
	1	Traes_2DS_D014BDCA2.1	pectinesterase
	0.5	Traes_2AL_1E3B3BC40.2	--
	1.2	Traes_2DS_9520F146E.1	L-ascorbate oxidase
	2	Traes_3DL_A740358F6.1	mitochondrial protein import protein ZIM17
	1.5	Traes_5BL_FD504C45C.1	uncharacterized protein
	1	Traes_5AS_A977349961.2	F-box and leucine-rich repeat protein 2/20
	0	Traes_3AS_0E7CB4B4A.2	sentrin-specific protease 1
	2.5	Traes_2BS_BD5C477FF.1	UDP-glucosyl transferase 73C
	2.5	Traes_7DS_1797D4951.1	pathogenesis-related protein 1
	2.5	Traes_4BL_B8AFF0CE3.1	solute carrier family 32 (vesicular inhibitory amino acid transporter)
	2.5	Traes_2AL_E39ADEE0D.2	ATP-dependent RNA helicase
	1.5	Traes_3DS_C15BBC2CB.1	--
	1.5	Traes_6BS_CBD931158.4	mTERF domain-containing protein, mitochondrial
	1.2	Traes_4DL_73FAC8F36.1	--
	2.5	Traes_1BL_7C8FD5930.1	interleukin-1 receptor-associated kinase 4
	1	Traes_2AS_45A0E50BF.1	serine/threonine-protein phosphatase 5
	2.5	Traes_7AL_A3E22A171.1	--
	2	Traes_5BS_248221339.1	--
	1	Traes_1BL_9143E08FD.2	general transcription factor 3C polypeptide 5 (transcription factor C subunit 1)
	0	Traes_7DL_68CB1808C.1	interleukin-1 receptor-associated kinase 1
	1.5	Traes_5AS_98B9EF5B2.1	--
	2	Traes_7DL_D2EB7B8DF.1	E3 ubiquitin-protein ligase EL5
	1.5	Traes_5AS_244562A2A.1	--
	0.8	Traes_4DS_E4442B2FF.1	transcription factor MYC2
	1	Traes_2BL_14B133AEB.1	fructose-bisphosphate aldolase, class I
	0.8	Traes_5AL_1311205EE.2	sacsin
	1.5	Traes_2BS_748FD4958.1	queuine tRNA-ribosyltransferase subunit QTRTD1
	1	Traes_4AS_35A112009.2	--
	0	Traes_4AS_265BF3644.1	syntaxin-binding protein 5
	2.5	Traes_6AL_1F3D8B768.1	--
	1	Traes_1AL_1E7404054.1	leucyl-tRNA synthetase
	2	Traes_7DL_FBE9894EB.1	--
	2	Traes_4DL_6FC6B26E7.2	guanylate kinase
	1.5	Traes_3DL_1E1B2925F.1	carboxymethylenebutenolidase
	2	Traes_1AL_5F778FAAB.1	--
	1	Traes_2DL_7D7B1B55D.1	1-deoxy-D-xylulose-5-phosphate synthase
	1	Traes_7DS_5A117F2B1.2	achilleol B synthase
	1.5	Traes_1AL_43F02DB49.1	dolichyl-diphosphooligosaccharide--protein glycosyltransferase
	1.5	Traes_2BS_A0F8B14F5.2	glutamine synthetase
	2.5	Traes_4AL_BC704AB76.1	--
	2	Traes_3AS_787974D60.1	crossover junction endonuclease MUS81
	1	Traes_1DL_3873CDB4B.2	alpha-1,4-galacturonosyltransferase
	2.5	Traes_2BS_0E4C76A6B.2	--
	2	Traes_3B_D3F75F9E9.1	zinc finger protein
	1.5	Traes_4BS_481E26C44.1	--
	2	Traes_2AL_79AD48080.1	heparan-alpha-glucosaminide N-acetyltransferase
	1	Traes_3AL_20404D7E4.1	mitochondrial-processing peptidase subunit alpha
	0	Traes_6BL_45831D6F8.1	CUG-BP- and ETR3-like factor
	1.2	Traes_5BS_46B8030E9.1	protein transport protein SEC61 subunit beta
	2	Traes_4BS_1BAD49C4E.2	splicing factor U2AF 65 kDa subunit
	0	Traes_7AL_076CFDA60.1	nitrate reductase (NAD(P)H)
	0	Traes_2DS_7B7201B62.1	2,4-dihydroxy-1,4-benzoxazin-3-one-glucoside dioxygenase
	2	Traes_3AL_EAADE1825.1	--
	2.5	Traes_5AL_CAF698B25.2	E3 ubiquitin-protein ligase SIAH1
	2.2	Traes_4BL_6CBFA2771.1	translation initiation factor 2 subunit 1
	0.5	Traes_7BS_E3E8C9AAE.1	signal recognition particle receptor subunit beta
	1	Traes_6DL_38B41C198.1	--
	2	Traes_2BL_A687959FB.2	non-specific serine/threonine protein kinase
	0	Traes_6AL_8394C0D62.1	peptidyl-prolyl isomerase E (cyclophilin E)
	2	Traes_2BS_879851C74.1	annexin A7/11
	2	Traes_5DS_07A2D59F5.3	--
	0	Traes_5AS_E1F692526.1	SWI/SNF related-matrix-associated actin-dependent regulator of chromatin subfamily C
	2	Traes_5AS_9DC956868.2	molecular chaperone DnaJ
	0.5	Traes_5BL_756B1DFCF.7	5'-AMP-activated protein kinase, catalytic alpha subunit
	2.2	Traes_1DL_547D8DAC2.1	MFS transporter, SP family, solute carrier family 2 (myo-inositol transporter), member 13
	0	Traes_7DL_73928596C.1	14-3-3 protein epsilon
	2	Traes_1BL_D7214C937.1	--
	1.5	Traes_6BL_E1793636C.1	MADS-box transcription factor, plant
	0	Traes_7AL_EAA637F04.1	(S)-coclaurine N-methyltransferase
	2	Traes_5BL_82E45824C.1	--
	2.5	Traes_1AL_EAA953F21.2	flavonol synthase
	2	Traes_4BL_415F0F7C7.2	xylose isomerase
	2	Traes_5AL_637B13721.2	--
	0.5	Traes_5DL_A061F2DD6.1	abnormal spindle-like microcephaly-associated protein
	1.5	Traes_4AL_C777CFC24.2	uridine nucleosidase
	0	Traes_6BL_102D3B9FB.2	serine/threonine-protein phosphatase 2B regulatory subunit
	0.5	Traes_1BL_1FE978865.2	AP-2 complex subunit mu-1
	2	Traes_4AS_77298075B.1	protein O-GlcNAc transferase
	2	Traes_4BL_A71648154.1	3-ketoacyl-CoA synthase
	1.5	Traes_4AL_A99729A05.2	FUS-interacting serine-arginine-rich protein 1
	1.5	Traes_2BL_260DF778A.1	polyadenylate-binding protein
	2	Traes_4AL_F00707FAF.2	abnormal spindle-like microcephaly-associated protein
	1	Traes_5BL_45662533A.1	--
	1	Traes_7DL_ACACA513D.2	transcriptional repressor NF-X1
	0	Traes_7BS_9B69EEDDB.2	protein regulator of cytokinesis 1
	2	Traes_2BL_07AD14DF5.2	cysteamine dioxygenase
	2	Traes_2DS_E6EDAED7B.1	peroxidase
	1.2	Traes_2BL_09184B677.2	TatD DNase family protein
	1.5	Traes_2BS_A87D49831.1	pyruvate dehydrogenase kinase 2/3/4
	1	Traes_6BL_9E43B8FCD.1	--
	2	Traes_4AS_6C23CE2D6.1	nuclear cap-binding protein subunit 1
	1	Traes_5DL_B3C8DD9AA.1	--
	2	Traes_5AL_DF67B2B34.1	--
	0	Traes_2DL_7679795E3.2	heterogeneous nuclear ribonucleoprotein G
	1.5	Traes_6BS_812D3A692.1	mTERF domain-containing protein, mitochondrial
	2	Traes_4BS_F83CB32DD.1	myb proto-oncogene protein, plant
	1	Traes_4BS_AD0C0BB89.1	1-phosphatidylinositol-3-phosphate 5-kinase
	1	Traes_5DL_DDCD2701D.1	serine/threonine-protein phosphatase 2A regulatory subunit B'
	0	Traes_1DL_CC4D484BB.5	--
	1	Traes_2DL_24888A074.1	protein transport protein SEC24
	1	Traes_7AL_FFC5B8676.1	--
	1.5	Traes_1AL_38EEA508C.1	auxin influx carrier (AUX1 LAX family)
	0.2	Traes_1DL_C5F65B9D4.2	disease resistance protein RPS2
	1	Traes_2BL_07C9811CB.1	--
	1.5	Traes_2BL_ED0C079ED.1	--
	0	Traes_6AS_F3191CE3B.1	--
	2.5	Traes_3B_F66658675.1	interleukin-1 receptor-associated kinase 4
	0	Traes_1AS_FE5279B08.1	ubiquitin-conjugating enzyme E2 O
	2	Traes_6DS_016F70618.2	--
	2	Traes_6AS_3AC3DD191.3	kelch-like protein 2/3
	2	Traes_2DS_070B0664F.1	--
	1.5	Traes_7DL_EFB19C389.1	--
	1.5	Traes_7DL_C1366F921.1	pentatricopeptide repeat domain-containing protein 1
	1.5	Traes_5DS_FA3FB6616.2	adenylate kinase
	0	Traes_5DL_6ADDEBB8B.1	photosystem II 13kDa protein
	1	Traes_2DS_C8CC2F963.1	ATP-dependent RNA helicase DDX21
	2	Traes_4DL_3FD11FE1C.1	--
	2	Traes_4BS_105DAA77B.1	glycerol-3-phosphate acyltransferase
	2	Traes_7AS_E43D64A80.2	disease resistance protein RPM1
	1	Traes_5AL_670A84226.3	--
	2	Traes_1DL_31E85CE0E.2	fatty acid omega-hydroxylase
	0.5	Traes_5BL_769E8EB68.1	--
	1.5	Traes_1DL_DC61DA172.1	cytochrome P450, family 26, subfamily A
	2.5	Traes_2BL_BE598F27F.2	--
	1.8	Traes_2BL_1F65F526D.1	UDP-glucosyl transferase 73C
	1	Traes_4DS_990D31BB1.6	elongation factor 1-alpha
	2	Traes_7AS_CA6E66D75.2	MADS-box transcription factor, plant
	0	Traes_4AL_42B8CC574.3	cytokinin trans-hydroxylase
	2	Traes_3DL_0B56AE424.1	5'-AMP-activated protein kinase, catalytic alpha subunit
	2.5	Traes_7BS_C541DF41A.1	pre-mRNA-processing factor 8
	2.5	Traes_7DL_82C99049D.1	premnaspirodiene oxygenase
	0.5	Traes_3DL_71B7E80D2.1	protein phosphatase 2C
	0	Traes_7BL_8A0171EF6.1	--
	1	Traes_1AL_7FE24229E.2	protein KRI1
	1.5	Traes_1BL_1E2A556E1.2	--
	2.5	Traes_1AL_CC2C419C4.2	vacuolar protein sorting-associated protein 13A/C
	0.5	Traes_2DS_F438957FE.1	leucine-rich PPR motif-containing protein, mitochondrial
	1	Traes_2DL_A270533A81.1	--
	2.5	Traes_1DL_14CCD1497.2	phosphoglycerate kinase
	2	Traes_1BL_99CE41F50.1	magnesium transporter
	1	Traes_2AL_1D6C6AF21.4	--
	0	Traes_4AS_70BE0A0AB.1	jasmonate ZIM domain-containing protein
	2	Traes_3DL_4A579C5AE.2	4-diphosphocytidyl-2-C-methyl-D-erythritol kinase
	0	Traes_7BS_BA937B73D.2	2,3-bisphosphoglycerate-dependent phosphoglycerate mutase
	1.5	Traes_6BL_F03DF2949.2	signal peptide peptidase-like 2B
	1.2	Traes_3AL_09BDFC4B4.2	--
	2.5	Traes_3DS_2BA4812B7.2	aarF domain-containing kinase
	1	Traes_4BS_E52BF8FF4.1	--
	1	Traes_7AL_E92ABFC84.1	--
	1.5	Traes_1DL_3A01C977F.1	kynurenine---oxoglutarate transaminase / cysteine-S-conjugate beta-lyase / glutamine---phenylpyruvate transaminase
	1.5	Traes_4AL_81AAFD885.1	--
	0	Traes_6BL_A5A986E6C.1	26S proteasome regulatory subunit N7
	1.5	Traes_6BS_E9D7788BF.2	--
	1	Traes_6AL_686E9F639.1	magnesium/proton exchanger
	1	Traes_7BS_941D0F9E7.1	--
	1	Traes_3DS_FA579628B.1	crossover junction endonuclease MUS81
	2	Traes_1AL_FA4A9FA74.1	gelsolin
	2.5	Traes_2BS_48B2AB466.1	--
	1.5	Traes_7AL_96383AEEC.1	glucuronoxylan 4-O-methyltransferase
	0	Traes_4BS_50DC8F474.1	ubiquitin carboxyl-terminal hydrolase 7
	0	Traes_2AL_240AD61B7.1	--
	2	Traes_3AL_88DD697D6.1	farnesol kinase
novel_mir_1419	1.8	Traes_7AL_6403E0CED.2	--
	0.5	Traes_7AS_ADDEDB689.1	--
	1.8	Traes_2DL_C06A5A734.2	stress-induced-phosphoprotein 1
novel_mir_1544	1.8	Traes_2AL_3612952FF.2	--
	2.5	Traes_7AL_8AE350A91.7	histone demethylase JARID1
	2	Traes_2DL_D16041625.1	--
	2.5	Traes_7DL_F67B7AB7E.5	chromodomain-helicase-DNA-binding protein 4
	2.5	Traes_7BL_2F1100E68.6	histone demethylase JARID1
	2.2	Traes_3AS_DFF241D83.1	solute carrier family 15 (peptide/histidine transporter), member 3/4
	2	Traes_2BL_8A0970FD9.1	--
novel_mir_1560	2.5	Traes_2AL_6389D8804.1	--
	2	Traes_7BL_296584EF8.1	coatomer, subunit beta'
	2.5	Traes_6DL_E84B04F49.4	WNK lysine deficient protein kinase
	2	Traes_7BL_4DD3BEE56.1	interleukin-1 receptor-associated kinase 4
	2	Traes_2DS_ED68DC14E.1	calmodulin
	2.5	Traes_4DS_4D166CAB5.3	WNK lysine deficient protein kinase
	2	Traes_4AS_145927471.3	aquaporin TIP
	2.5	Traes_2BL_2859513ED.1	--
	2	Traes_5BS_9BB979CB4.2	interleukin-1 receptor-associated kinase 1
	1.2	Traes_6AL_43E1105C6.8	coatomer, subunit beta'
	2.2	Traes_7BS_70A64FD98.2	interleukin-1 receptor-associated kinase 4
	2	TRAES3BF063400060CFD_t1	interleukin-1 receptor-associated kinase 1
	2	Traes_5AL_CDD517489.2	disease resistance protein RPS2
	1	Traes_6DL_D40256437.2	coatomer, subunit beta'
	1.5	Traes_3B_91F4FD365.1	zinc finger FYVE domain-containing protein 26
	2.5	Traes_6AS_0A93464E7.9	WNK lysine deficient protein kinase
	2.2	Traes_7DL_B6B95FA82.2	coatomer, subunit beta'
	2.5	Traes_2AL_7C900ACA5.1	interleukin-1 receptor-associated kinase 1
	1	Traes_6BL_EF5161860.3	coatomer, subunit beta'
	2.5	Traes_2DL_548C72FC2.2	coatomer, subunit beta'
	2	Traes_5BL_BCF1D2649.2	disease resistance protein RPS2
	2	Traes_2AS_75618D6FF.1	calmodulin
	2.2	Traes_2DS_3F08EB593.1	interleukin-1 receptor-associated kinase 1
	2.2	Traes_4AL_52B789820.1	coatomer, subunit beta'
	2.5	Traes_2DL_10C922B14.1	formin 2
	2	TRAES3BF063700030CFD_t1	interleukin-1 receptor-associated kinase 1
	2.2	Traes_5BL_3DC0729AB.2	interleukin-1 receptor-associated kinase 4
	2	Traes_5DS_9592FAB7B.2	interleukin-1 receptor-associated kinase 4
	0	Traes_7DL_AB7C59D49.4	coatomer, subunit beta'
	2.2	Traes_7BL_A1F123CEF.2	coatomer, subunit beta'
novel_mir_1613	2.5	Traes_6DL_D8236C142.1	ribosomal RNA-processing protein 12
novel_mir_1617	2.5	Traes_1DL_D7CD5D71A.2	ubiquitin carboxyl-terminal hydrolase 36/42
	1.8	Traes_7DL_0A4B48BA5.2	prolactin regulatory element-binding protein
	1.8	Traes_4DS_03EA4A9DF.1	prolactin regulatory element-binding protein
	2.5	Traes_7BS_C3E89D1A7.2	type II pantothenate kinase
	0.8	Traes_7BL_45D46CC92.1	prolactin regulatory element-binding protein
	2	Traes_2DL_30F23E577.1	coproporphyrinogen III oxidase
	2	Traes_2AL_DF262E611.1	coproporphyrinogen III oxidase
	2.5	Traes_6DS_D46F76F93.1	ATP-dependent RNA helicase DDX41
	2.5	Traes_7DS_BD39A85FC.1	structure-specific endonuclease subunit SLX1
	2.2	Traes_4AL_9D36EABF8.1	prolactin regulatory element-binding protein
	2.5	Traes_1BL_DBC65131C.1	ubiquitin carboxyl-terminal hydrolase 36/42
	1.8	Traes_7AL_63846DF57.2	prolactin regulatory element-binding protein
	1.8	Traes_4BL_496BD2A2C.2	prolactin regulatory element-binding protein
	2.5	Traes_3AL_398647708.2	--
	2.5	Traes_1AL_264041050.1	ubiquitin carboxyl-terminal hydrolase 36/42
	2	Traes_2BL_D33683EE9.1	coproporphyrinogen III oxidase
	2.5	Traes_6AS_9EB477620.1	--
novel_mir_1686	2.5	Traes_7DS_1401F945A.1	nucleolin
	2.5	TRAES3BF110400070CFD_t1	--
	2	Traes_2DS_DD775CE3B.1	LRR receptor-like serine/threonine-protein kinase FLS2
	2.2	Traes_1AL_7262657D3.1	senescence-induced receptor-like serine/threonine-protein kinase
	2.5	Traes_7BS_1F4C5C328.1	nucleolin
	2.5	Traes_7AS_1E8676F48.1	--
	2.2	Traes_1BL_FB014EA83.1	interleukin-1 receptor-associated kinase 4
novel_mir_1737	2.2	Traes_4BS_1DCF82CB7.1	ATP-dependent RNA helicase DHX8/PRP22
	2.5	Traes_3DL_BCBDB2406.1	myb proto-oncogene protein, plant
	2	Traes_2DL_E39D606E5.1	26S proteasome non-ATPase regulatory subunit 10
	2	Traes_2DL_A29A5DFAA.1	stress-induced-phosphoprotein 1
	2.5	Traes_4BS_96AE357C6.1	--
	1.5	Traes_2BL_6233653C1.1	--
	2.5	Traes_2DS_201C36F8A.1	exosome complex component MTR3
novel_mir_1744	0	Traes_1AL_1295C7F39.1	ubiquitin-conjugating enzyme E2 O
novel_mir_2079	2.5	Traes_7AS_FB1ED87EF.2	sentrin-specific protease 1
	2	Traes_1DL_8EECFC55E.2	ATP-dependent Clp protease, protease subunit
novel_mir_2133	1.5	Traes_5AL_1E87BC534.1	--
	1.8	Traes_2AL_21DE5BA34.2	fructose-bisphosphate aldolase, class I
	1.5	Traes_4BS_FC16221A2.2	LRR receptor-like serine/threonine-protein kinase EFR
	1	Traes_2DL_2FB11E18C.1	interleukin-1 receptor-associated kinase 1
	0.2	Traes_1AL_5DA69A7AC.2	midasin
	1	Traes_2BL_B2EC5535B.1	interleukin-1 receptor-associated kinase 1
	1.5	Traes_3AS_7F4F840B3.1	splicing factor 3A subunit 1
	2.5	Traes_4DS_477CA2A2F.1	peptide chain release factor subunit 1
	1.2	Traes_7AS_9674F6981.4	dynamin GTPase
	1	Traes_5BS_ACADC6031.2	disease resistance protein RPM1
	2	Traes_1DL_AF10DFC9A.2	dimethylaniline monooxygenase (N-oxide forming)
	1.2	Traes_3DL_4C255B900.1	polyneuridine-aldehyde esterase
	1.5	Traes_3DL_19DFB0DBE.1	large subunit ribosomal protein L27
	0.2	Traes_5AL_BE831EEC2.4	RNA exonuclease 4
	1	Traes_5AL_6D3435280.1	--
	2	Traes_5BL_159685EF1.1	--
	0.2	Traes_1AL_EDBE3B3F1.1	tetraspanin-5
	2.5	Traes_6DL_9CFB8853B.1	callose synthase
	0	Traes_7DS_8B028A5CA.1	mTERF domain-containing protein, mitochondrial
	1	Traes_3AS_47780354D.2	endonuclease III
	1	Traes_5DS_99C28784C.1	disease resistance protein RPM1
	0.5	Traes_7BL_4F447C19A.1	pentatricopeptide repeat domain-containing protein 1
	1	Traes_1AL_B60132B5A.2	speckle-type POZ protein
	2.5	Traes_3AL_8804EA96B.1	--
	0	Traes_6BL_304092BEE.1	callose synthase
novel_mir_2185	2.5	Traes_5DL_D0AFCEB32.3	pentatricopeptide repeat domain-containing protein 1
	2.5	Traes_5BL_18689F6BA.2	pentatricopeptide repeat domain-containing protein 1
novel_mir_2191	1.5	Traes_5BL_5FE09CFB2.2	RNA polymerase-associated protein LEO1
	1	Traes_3AL_286E85035.1	--
	1	Traes_1AS_23DF839AF.2	epsin
novel_mir_2567	1.5	Traes_5BL_8F17C2676.1	solute carrier family 25, member 44
	1.5	Traes_5DL_DBDE7896F.1	solute carrier family 25, member 44
	1.5	Traes_5AL_67421246B.1	solute carrier family 25, member 44
novel_mir_2745	2.5	Traes_7BS_D91D1E29A.1	protein regulator of cytokinesis 1
	2.5	Traes_7AS_90DB14B70.1	protein regulator of cytokinesis 1
novel_mir_3314	2	Traes_7AL_1BC53C605.1	inositol oxygenase
	2	Traes_1DS_275C61002.2	--
	2	Traes_5BL_672642904.1	solute carrier family 36 (proton-coupled amino acid transporter)
	2	TRAES3BF025700020CFD_t1	heat shock transcription factor, other eukaryote
	2	Traes_4DL_9A51D1EB2.2	heat shock transcription factor, other eukaryote
	2	Traes_7BL_66296695F.1	auxin response factor
	2.5	Traes_4DS_58C8EF3CE.1	SET and MYND domain-containing protein
	2	TRAES3BF273100010CFD_t1	hydroxymethylglutaryl-CoA reductase (NADPH)
	1.5	Traes_5DL_F67EE2F00.2	solute carrier family 36 (proton-coupled amino acid transporter)
	2	Traes_1AS_CB747FFE1.2	--
	2	Traes_5BL_57D831CCB.2	solute carrier family 36 (proton-coupled amino acid transporter)
	2	TRAES3BF025700050CFD_t1	heat shock transcription factor, other eukaryote
novel_mir_3417	1.5	Traes_2BL_9212477E8.2	DNA replication ATP-dependent helicase Dna2
	2.2	Traes_6BS_9C2C7E4BE.1	hydroxymethylbilane synthase
	1.5	Traes_2DL_66881C022.2	DNA replication ATP-dependent helicase Dna2
	1.5	TRAES3BF077600050CFD_t1	--
	2.5	Traes_1DL_029840D9E.2	--
	1.5	Traes_2AL_F5F59C512.2	DNA replication ATP-dependent helicase Dna2
novel_mir_3607	2.2	Traes_6BS_9C2C7E4BE.1	hydroxymethylbilane synthase
	1	Traes_2AL_F5F59C512.2	DNA replication ATP-dependent helicase Dna2
	1.5	TRAES3BF077600050CFD_t1	--
	1	Traes_2DL_66881C022.2	DNA replication ATP-dependent helicase Dna2
	1	Traes_2BL_9212477E8.2	DNA replication ATP-dependent helicase Dna2
	2	Traes_1AL_990E4507E.1	--
	2	Traes_5BL_FD7E78F1A.1	soyasaponin III rhamnosyltransferase
	2.5	Traes_1DL_029840D9E.2	--
novel_mir_3791	2.5	TRAES3BF011300010CFD_t1	DnaJ homolog subfamily C member 7
	2	TRAES3BF021800230CFD_t1	solute carrier family 4 (anion exchanger), member 2
	2	Traes_6DL_D3F00DD0E.1	--
	2	Traes_2BL_E1DB96FA9.1	histone-lysine N-methyltransferase SETD2
	2.5	Traes_2DL_187F80D20.2	copper chaperone for superoxide dismutase
	2.5	TRAES3BF011500020CFD_t1	DnaJ homolog subfamily C member 7
	2	Traes_3DS_5DED59308.2	--
	2	Traes_2AL_F2EFC6E67.1	histone-lysine N-methyltransferase SETD2
	2.2	Traes_1BS_10F3CB787.1	--
	2.5	Traes_5DL_398615728.2	omega-3 fatty acid desaturase (delta-15 desaturase)
	2	Traes_4DL_5FF82B159.1	--
	2	Traes_2DL_B49BF1781.2	histone-lysine N-methyltransferase SETD2
	2.2	Traes_1BS_1E67F5AE2.2	--
	2.2	Traes_5DL_C8A7FE090.1	--
	2	TRAES3BF045500210CFD_t1	alpha-amylase
	1	Traes_6DL_39D7DE564.1	ceramide synthetase
novel_mir_4740	2	Traes_7AS_5BBC303CA.1	phospholipid-translocating ATPase
	2	Traes_7DS_1F5ECF731.1	phospholipid-translocating ATPase
	2.2	Traes_3AS_183A67F2E.1	--
	2.5	Traes_7DS_55D605D7A.1	--
	2	Traes_7BS_B8EA79ABC.2	phospholipid-translocating ATPase
novel_mir_5169	1.2	Traes_6AL_7A217A948.1	disease resistance protein RPM1
	1.8	Traes_7BL_6CF949A41.2	disease resistance protein RPM1
	2	Traes_6DL_3CF5E0410.2	disease resistance protein RPM1
	1.8	Traes_6AL_8BF77066D.3	disease resistance protein RPM1
	2	Traes_6AL_FCF2BA48D.2	disease resistance protein RPM1
	2	Traes_6BL_27A6BDD76.1	disease resistance protein RPM1
	2	Traes_6AL_54966DD98.1	disease resistance protein RPM1
	1.5	Traes_6BL_09CE733BC.1	disease resistance protein RPM1
	2	Traes_6AL_22F03E292.2	disease resistance protein RPM1
	2.5	Traes_1AS_F98F74FCD.1	disease resistance protein RPM1
	1.2	Traes_3AS_35CC39679.1	disease resistance protein RPM1
	2	Traes_1AS_DB68BD22D.1	disease resistance protein RPM1
	2	Traes_7AL_7B204667E.2	disease resistance protein RPM1
	1.2	Traes_3DL_5C0BC5611.2	disease resistance protein RPM1
novel_mir_5172	2.2	Traes_7DS_205267E87.1	light-harvesting complex I chlorophyll a/b binding protein 1
novel_mir_5542	2.5	Traes_5AL_E1F7DD9EA.1	cyclic nucleotide gated channel, other eukaryote
	2.5	Traes_5BL_0F3A986F9.2	molecular chaperone HtpG
	2.5	Traes_5AL_0C2D144B0.1	molecular chaperone HtpG
	2	Traes_2BL_4AE4C5C61.1	palmitoyltransferase
	2	Traes_4DL_9A51D1EB2.2	heat shock transcription factor, other eukaryote
	1.5	Traes_7BL_66296695F.1	auxin response factor
	2	TRAES3BF025700050CFD_t1	heat shock transcription factor, other eukaryote
	2.5	TRAES3BF071200070CFD_t1	--
	2	Traes_2DL_1AE2A05E8.1	palmitoyltransferase
	1.5	Traes_1AS_CB747FFE1.2	--
	2	Traes_2AL_53D04A987.2	palmitoyltransferase
novel_mir_5598	2.5	Traes_2BS_99AD38FAF.1	phage shock protein A
	1.8	Traes_2DL_8AB4895C2.2	mitogen-activated protein kinase kinase kinase 2
	2.5	Traes_6BL_7F253B7FA.1	alpha-1,4-galacturonosyltransferase
	1.8	Traes_2DL_EF06B33F9.2	--
	2.2	Traes_5DL_8214EA296.1	20S proteasome subunit beta 6
	2.5	Traes_3AL_7C816F0D6.1	phage shock protein A
	2.5	Traes_4AL_D431CAAAB.1	eukaryotic translation initiation factor 2C
	2.5	TRAES3BF021700030CFD_t1	phage shock protein A
	2.5	Traes_2DS_3190DAA30.1	phage shock protein A
	1.8	Traes_2AL_C93FB1762.2	mitogen-activated protein kinase kinase kinase 2
	2.5	Traes_6AL_616161AAB.2	eukaryotic translation initiation factor 2C
	2.5	Traes_2AS_8CE0AADC5.1	phage shock protein A
	2.2	Traes_6BL_6A46043D0.1	disease resistance protein RPM1
novel_mir_5756	2.5	Traes_4DL_4C0CF2E03.1	pentatricopeptide repeat domain-containing protein 1
	1.5	Traes_1AL_6F1907FF4.1	DNA-directed RNA polymerase I subunit RPA2
	2.5	Traes_4AS_84505C56C.1	--
	2	Traes_6AL_55A2DB2C6.1	abnormal spindle-like microcephaly-associated protein
	2.5	Traes_4BL_5D316DD23.1	AP2-like factor, ANT lineage
	1.8	Traes_4AL_6E7713B2F.1	beta-fructofuranosidase
	2.5	Traes_6AL_34E9B21F7.1	E3 ubiquitin-protein ligase RNF38/44
	2.5	Traes_5BL_D4625FF94.2	--
	1.5	Traes_1DL_04FFC7E48.1	DNA-directed RNA polymerase I subunit RPA2
	2.5	Traes_4DL_665E6EA10.1	5'-AMP-activated protein kinase, catalytic alpha subunit
	2.5	Traes_1BS_6F5A5981E.4	--
	2.5	Traes_5AS_B2606FAD3.1	homeobox protein Meis2
	2.5	Traes_2AL_9E68ABA72.1	--
	2.2	Traes_2BL_C84DD0419.1	--
	2.5	Traes_2DL_90610D510.1	signal peptidase complex subunit 2
	2	Traes_1DS_1EA1BE87E.3	structure-specific endonuclease subunit SLX1
	2.5	Traes_1BL_45150C207.1	--
	2.5	Traes_3AL_60ACCC6B3.1	V-type H+-transporting ATPase 21kDa proteolipid subunit
	2.5	Traes_1AL_7242F453D.1	DNA mismatch repair protein MutS2
	2	Traes_4BS_AE037BE90.1	--
	2	Traes_7BL_2C564E996.2	--
	2.5	Traes_6AS_C55463572.1	--
	2.5	Traes_3DL_0BAE401F0.1	auxin response factor
	2.5	Traes_4AL_C39245F02.2	exosome complex component RRP43
	1.5	Traes_4DL_5FF82B159.1	--
	2.5	Traes_1DS_5FF8D9E2D.2	disease resistance protein RPM1
	2.5	Traes_1AS_F98F74FCD.1	disease resistance protein RPM1
	2.5	Traes_5DL_587BD8B7D.1	cinnamoyl-CoA reductase
	2	Traes_6DL_39D7DE564.1	ceramide synthetase
novel_mir_5816	2.5	Traes_5DL_6B09AFADC.1	formate--tetrahydrofolate ligase
	2.5	Traes_5AL_020BB9D69.1	formate--tetrahydrofolate ligase
	2.5	Traes_5BL_05819E27A.1	formate--tetrahydrofolate ligase
	2.2	Traes_1DL_8EECFC55E.2	ATP-dependent Clp protease, protease subunit
novel_mir_5831	2	Traes_5BL_66F120E1A.1	--
	1.8	Traes_3AS_98B360ADE.1	4-methyl-5(b-hydroxyethyl)-thiazole monophosphate biosynthesis
	2.2	Traes_7DL_BD9F3F3CD.1	phosphoglucomutase
	2	Traes_5BL_66F120E1A.1	--
	1.8	Traes_3AS_98B360ADE.1	4-methyl-5(b-hydroxyethyl)-thiazole monophosphate biosynthesis
	2.2	Traes_7DL_BD9F3F3CD.1	phosphoglucomutase
novel_mir_1153	1.8	Traes_5AL_FB8A3A1BB.2	--
	1.5	Traes_1AS_7AB089C23.1	--
	1.5	Traes_6BS_8EB9E6EC7.2	disease resistance protein RPM1
	1.5	Traes_2BL_BC038628B.1	heat shock transcription factor, other eukaryote
	0	Traes_4BL_379DA1919.1	threonine aldolase
	2.5	Traes_1AL_B6F713FA8.1	kinesin family member C2/C3
	0.5	Traes_4AS_144A4BFD1.1	replication factor A1
	1.5	Traes_7BL_56B80DB6F.1	meiotic recombination protein SPO11
	1	Traes_4DL_253F18B56.1	HSP20 family protein
	1.5	Traes_5DL_F75860E0B.1	cell division protease FtsH
	1.5	Traes_5DS_0B17FFD55.1	ethylene-insensitive protein 3
	1.5	Traes_1AS_6C2BED457.1	--
	1	Traes_2DS_BCB7C3C11.1	mTERF domain-containing protein, mitochondrial
	0	Traes_4AS_9B8749CEB.2	ribonucleases P/MRP protein subunit RPP25
novel_mir_1202	2	Traes_3AS_D6334436F.4	mTERF domain-containing protein, mitochondrial
	1.5	Traes_6DS_EF75D5C67.1	mTERF domain-containing protein, mitochondrial
	1	Traes_5BL_B26F674CF.1	mTERF domain-containing protein, mitochondrial
	1.5	Traes_6BS_276ACF176.1	mTERF domain-containing protein, mitochondrial
	2.5	Traes_3B_7E0C70389.1	interleukin-1 receptor-associated kinase 4
	1.5	Traes_6BS_D86C76539.1	mTERF domain-containing protein, mitochondrial
	1	Traes_6AS_E48EF5A7A.1	mTERF domain-containing protein, mitochondrial
	2	Traes_6DS_93C7DA226.1	mTERF domain-containing protein, mitochondrial
	1.5	Traes_6DS_1CC9DD1EC.1	mTERF domain-containing protein, mitochondrial
	1.8	Traes_5BL_C79594291.1	mTERF domain-containing protein, mitochondrial
	1.5	Traes_6DS_C67E0A030.1	mTERF domain-containing protein, mitochondrial
	1.2	Traes_5DL_7643B2ADB.1	mTERF domain-containing protein, mitochondrial
	1.5	Traes_6BS_E71FD70EE1.1	mTERF domain-containing protein, mitochondrial
	1.8	Traes_4AL_A4B73CC6A1.2	mTERF domain-containing protein, mitochondrial
	2.5	Traes_3DL_1E1F54063.1	interleukin-1 receptor-associated kinase 4
	2.5	Traes_5DL_D58768AC8.1	interleukin-1 receptor-associated kinase 4
	2	Traes_6DS_A2E0A29DE.1	mTERF domain-containing protein, mitochondrial
	2	Traes_6BS_25F5046E7.1	mTERF domain-containing protein, mitochondrial
	1.5	Traes_6AS_D5A6B2CDD.1	mTERF domain-containing protein, mitochondrial
	2.5	Traes_5BL_6E99418D1.1	interleukin-1 receptor-associated kinase 4
	1	Traes_2BL_428FAB7F7.1	mTERF domain-containing protein, mitochondrial
	2	Traes_6AS_F7B50CFC6.1	mTERF domain-containing protein, mitochondrial
	2	Traes_6DS_2D4EFFF3E.1	mTERF domain-containing protein, mitochondrial
	1.5	Traes_6DS_0E84AAF77.1	mTERF domain-containing protein, mitochondrial
	1.2	Traes_5BL_4B55FFD72.2	mTERF domain-containing protein, mitochondrial
	2	Traes_2BS_257C5B099.1	mTERF domain-containing protein, mitochondrial
	1.2	Traes_6BS_CC20739DE.1	mTERF domain-containing protein, mitochondrial
	1.8	Traes_6DS_79BC66C99.1	mTERF domain-containing protein, mitochondrial
	2	Traes_4BS_257C5B099.1	mTERF domain-containing protein, mitochondrial
	1	Traes_6AS_CC8B21340.1	mTERF domain-containing protein, mitochondrial
	2.5	Traes_5DL_A9969D596.1	mTERF domain-containing protein, mitochondrial
	2	Traes_3B_224A6B7E5.1	mTERF domain-containing protein, mitochondrial
	1.8	Traes_6DS_731D6507E.1	mTERF domain-containing protein, mitochondrial
	1.5	Traes_1DL_0CDB6989D.1	mTERF domain-containing protein, mitochondrial
	1.5	Traes_5DS_9F4A5AE9F.1	mTERF domain-containing protein, mitochondrial
	2.5	Traes_6DS_883C011AD.1	mTERF domain-containing protein, mitochondrial
	2	Traes_1DL_97426F3D9.3	mTERF domain-containing protein, mitochondrial
	1.8	Traes_6AS_B24138E62.1	mTERF domain-containing protein, mitochondrial
	1.5	Traes_6DS_BF460054E.1	mTERF domain-containing protein, mitochondrial
	1.8	Traes_5AL_C7EAE22CC.1	mTERF domain-containing protein, mitochondrial
	1.5	Traes_6DS_64DD7BAA2.1	mTERF domain-containing protein, mitochondrial
	2	Traes_6AS_8F6522734.1	mTERF domain-containing protein, mitochondrial
	2.5	Traes_6DS_EAB8901AD.1	mTERF domain-containing protein, mitochondrial
	1.5	Traes_6AS_2BDC1663A.1	mTERF domain-containing protein, mitochondrial
	1.8	Traes_6AS_29B3E9858.1	mTERF domain-containing protein, mitochondrial
	2.5	Traes_7BL_459346AF7.1	--
	1.2	Traes_6AS_480364CD5.1	mTERF domain-containing protein, mitochondrial
	2.5	Traes_3DL_E5EE243B0.1	formin 2
	2	Traes_2BS_DDF26C784.1	mTERF domain-containing protein, mitochondrial
	2.5	Traes_7BL_75414ED32.1	phospholipid:diacylglycerol acyltransferase
	1	Traes_6DS_8A0136580.1	mTERF domain-containing protein, mitochondrial
	2	Traes_5DS_16F2A41E2.1	mTERF domain-containing protein, mitochondrial
	2	Traes_6DS_93C7DA2261.1	mTERF domain-containing protein, mitochondrial
	1.5	Traes_6AS_15C1E6F18.2	mTERF domain-containing protein, mitochondrial
	1	Traes_1AL_3C796C3D3.1	mTERF domain-containing protein, mitochondrial
	2	Traes_1DL_5E046EFA0.1	mTERF domain-containing protein, mitochondrial
	1	Traes_6DS_3A1EA267A.17	mTERF domain-containing protein, mitochondrial
	1.8	Traes_6AS_0A204AEC9.2	mTERF domain-containing protein, mitochondrial
	1.5	Traes_6AS_7B7540F6D.1	mTERF domain-containing protein, mitochondrial
	2	Traes_2BS_257C5B0991.1	mTERF domain-containing protein, mitochondrial
	1.5	Traes_6AS_3AFC735F7.1	mTERF domain-containing protein, mitochondrial
	2.5	Traes_6AS_EBADF37C7.1	mTERF domain-containing protein, mitochondrial
	2.5	Traes_6BS_843505CB3.5	mTERF domain-containing protein, mitochondrial
	2	Traes_2BS_74269A4C5.1	mTERF domain-containing protein, mitochondrial
	1	Traes_2DL_BE754F0C1.1	mTERF domain-containing protein, mitochondrial
	1.5	Traes_6BS_28F0D2955.1	mTERF domain-containing protein, mitochondrial
	1.5	TRAES3BF261600050CFD_t1	mTERF domain-containing protein, mitochondrial
	2	Traes_6BS_938E60C80.1	mTERF domain-containing protein, mitochondrial
	1	Traes_1BL_37FA9C770.1	mTERF domain-containing protein, mitochondrial
	2	Traes_6BS_078313C71.1	mTERF domain-containing protein, mitochondrial
	1.5	Traes_6DS_A490DF33E.1	mTERF domain-containing protein, mitochondrial
	2.5	Traes_4AL_3A009739E.1	mTERF domain-containing protein, mitochondrial
	2.5	TRAES3BF104500030CFD_t1	formin 2
	1.5	Traes_5DS_094A03C13.1	mTERF domain-containing protein, mitochondrial
	1.8	Traes_6BS_1E0D70258.1	mTERF domain-containing protein, mitochondrial
	2	Traes_6AS_F7B50CFC61.1	mTERF domain-containing protein, mitochondrial
	1.5	Traes_6DS_2ED8299A11.1	mTERF domain-containing protein, mitochondrial
	1.5	Traes_6DS_422644406.1	mTERF domain-containing protein, mitochondrial
	2	Traes_6AS_36EAEADDD.3	mTERF domain-containing protein, mitochondrial
	2.5	Traes_3AL_3CA8601C3.3	interleukin-1 receptor-associated kinase 4
	1.8	Traes_5DL_02477C27A.1	mTERF domain-containing protein, mitochondrial
	1.5	Traes_1BL_A8B8F33D9.1	mTERF domain-containing protein, mitochondrial
	2.5	Traes_3AL_E01D0B52D.1	formin 2
	1.5	Traes_6AS_A2EAE01C1.1	mTERF domain-containing protein, mitochondrial
	2	Traes_6BS_A5FB0FF9D.1	mTERF domain-containing protein, mitochondrial
	1.5	Traes_6DS_E65BDAC1F.1	mTERF domain-containing protein, mitochondrial
	2	Traes_6BS_AEF9F3C00.3	mTERF domain-containing protein, mitochondrial
	2.5	Traes_6AS_B211B0425.1	mTERF domain-containing protein, mitochondrial
	1.5	Traes_6DS_3FC2ADA87.1	mTERF domain-containing protein, mitochondrial
	1.5	Traes_6BS_B8A0BF56F.2	mTERF domain-containing protein, mitochondrial
	1.5	Traes_2BS_0D569FC2A.1	mTERF domain-containing protein, mitochondrial
	1.5	Traes_6BS_2F108C5BB.1	mTERF domain-containing protein, mitochondrial
	2	Traes_6AS_F1919325C.1	mTERF domain-containing protein, mitochondrial
	1.5	Traes_6AS_6612DF8D7.3	mTERF domain-containing protein, mitochondrial
	1.5	Traes_6AS_073DEE100.1	mTERF domain-containing protein, mitochondrial
	1.5	Traes_6AS_2947CC609.1	mTERF domain-containing protein, mitochondrial
	2	Traes_6AS_3641B9C871.1	mTERF domain-containing protein, mitochondrial
	1.5	Traes_6AS_2FC18A5B9.6	mTERF domain-containing protein, mitochondrial
	1.5	Traes_6BS_C3247654A.1	mTERF domain-containing protein, mitochondrial
	2.5	Traes_7DL_F50060F73.1	phospholipid:diacylglycerol acyltransferase
novel_mir_1250	0.5	Traes_3DL_1E1B2925F.1	carboxymethylenebutenolidase
	0	Traes_4DS_990D31BB1.6	elongation factor 1-alpha
	0	Traes_3DL_838442186.1	U3 small nucleolar RNA-associated protein 11
	0	Traes_6AS_F3191CE3B.1	--
	0	Traes_1BL_65D58F997.6	--
	1	Traes_6DL_38B41C198.1	--
	0	Traes_3DL_3E215D878.2	delta-1-pyrroline-5-carboxylate synthetase
	1.5	Traes_2DS_8A873A037.2	nucleoprotein TPR
	2.2	Traes_7DL_73928596C.1	14-3-3 protein epsilon
	0.5	Traes_7BL_002EE3EC3.1	--
	1.5	Traes_4BS_481E26C44.1	--
	1.8	Traes_4DL_73FAC8F36.1	--
	1.5	Traes_2AL_1E3B3BC40.2	--
	2.5	Traes_7BS_E3E8C9AAE.1	signal recognition particle receptor subunit beta
	0.5	Traes_1AL_43F02DB49.1	dolichyl-diphosphooligosaccharide--protein glycosyltransferase
	2	Traes_1DL_CC4D484BB.5	--
	0.5	Traes_4AS_70BE0A0AB.1	jasmonate ZIM domain-containing protein
	0	Traes_7AL_EAA637F04.1	(S)-coclaurine N-methyltransferase
	1.5	Traes_2DL_7679795E3.2	heterogeneous nuclear ribonucleoprotein G
	0.2	Traes_2AS_607E72B1A.1	2,4-dihydroxy-1,4-benzoxazin-3-one-glucoside dioxygenase
	0	Traes_5BL_769E8EB68.1	--
	1	Traes_2DL_7511EDD3D.1	--
	1.8	Traes_7AL_96383AEEC.1	glucuronoxylan 4-O-methyltransferase
	2.2	Traes_2DL_7D7B1B55D.1	1-deoxy-D-xylulose-5-phosphate synthase
	2	Traes_4BL_5C52625BF1.1	beta-amylase
	2	Traes_6BL_9E43B8FCD.1	--
	0	Traes_6BL_45831D6F8.1	CUG-BP- and ETR3-like factor
	0.2	Traes_5DS_07A2D59F5.3	--
	0.5	Traes_3DL_71B7E80D2.1	protein phosphatase 2C
	1.5	Traes_2BS_748FD4958.1	queuine tRNA-ribosyltransferase subunit QTRTD1
	0.2	Traes_3AS_0E7CB4B4A.2	sentrin-specific protease 1
	2.5	Traes_6DL_F2CADEFF6.1	E3 ubiquitin-protein ligase RNF38/44
	0.5	Traes_7BS_BA937B73D.2	2,3-bisphosphoglycerate-dependent phosphoglycerate mutase
	2	Traes_5AS_E1F692526.1	SWI/SNF related-matrix-associated actin-dependent regulator of chromatin subfamily C
	2	Traes_3AL_2EB43ADE9.2	atypical dual specificity phosphatase
	2	Traes_3B_D3F75F9E9.1	zinc finger protein
	2	Traes_1AL_6B108514B.1	MADS-box transcription factor, plant
	2.2	Traes_3AL_20404D7E4.1	mitochondrial-processing peptidase subunit alpha
	1	Traes_2BS_5C64FC44A.2	interleukin-1 receptor-associated kinase 4
	0.5	Traes_4AL_A99729A05.2	FUS-interacting serine-arginine-rich protein 1
	1.5	Traes_4DL_9F7C8C343.1	sucrose synthase
	0.5	Traes_1DL_DDCF517E1.1	--
	0	Traes_5DL_6ADDEBB8B.1	photosystem II 13kDa protein
	1.5	Traes_4BL_BCC3FB7E7.1	--
	1.5	Traes_7AL_FFC5B8676.1	--
	2	Traes_2AL_B006D99BB.1	indole-3-pyruvate monooxygenase
	1	Traes_2DL_A270533A81.1	--
	2	Traes_5AL_670A84226.3	--
	0.5	Traes_7BL_EAB933665.1	--
	1	Traes_7DS_649C86819.1	--
	1	Traes_5BL_82E45824C.1	--
	2.5	Traes_5AS_A977349961.2	F-box and leucine-rich repeat protein 2/20
	2.2	Traes_4BL_CCCFCB411.1	--
	0.2	Traes_4AS_35A112009.2	--
	1.2	Traes_2DS_E6EDAED7B.1	peroxidase
	2	Traes_1BL_1E2A556E1.2	--
	0.2	Traes_7DL_ACACA513D.2	transcriptional repressor NF-X1
	1	Traes_6DL_D9D1CB849.2	--
	1.5	Traes_5BS_248221339.1	--
	2.5	Traes_6BL_E1793636C.1	MADS-box transcription factor, plant
	0	Traes_3B_F66658675.1	interleukin-1 receptor-associated kinase 4
	0	Traes_7DL_EFB19C389.1	--
	0.5	Traes_7BS_941D0F9E7.1	--
	1	Traes_7AL_4E998FAC1.1	--
	0	Traes_7BL_8A0171EF6.1	--
	0	Traes_6BL_A5A986E6C.1	26S proteasome regulatory subunit N7
	0.8	Traes_6AL_686E9F639.1	magnesium/proton exchanger
	2.5	Traes_2DS_9BCFF2B80.1	--
	2	Traes_4AS_71B1DAAE4.1	F-type H+-transporting ATPase subunit b
	2.5	Traes_2BL_C7C0901D4.2	mRNA (guanine-N7-)-methyltransferase
	2	Traes_1AS_FE5279B08.1	ubiquitin-conjugating enzyme E2 O
	1	Traes_2DL_24888A074.1	protein transport protein SEC24
	2.2	Traes_1DS_D08902BD6.1	interleukin-1 receptor-associated kinase 4
	1	Traes_2AL_1D6C6AF21.4	--
	1.2	Traes_5BL_756B1DFCF.7	5'-AMP-activated protein kinase, catalytic alpha subunit
	2.2	Traes_4AS_6C23CE2D6.1	nuclear cap-binding protein subunit 1
	0.8	Traes_2AS_DACE53B24.2	(S)-2-hydroxy-acid oxidase
	2	Traes_5AL_1311205EE.2	sacsin
	1.2	Traes_4AL_42B8CC574.3	cytokinin trans-hydroxylase
	2	Traes_2DS_9520F146E.1	L-ascorbate oxidase
	1.5	Traes_2DS_D014BDCA2.1	pectinesterase
	1	Traes_6AS_CF374995B.1	Xaa-Pro dipeptidase
	2	Traes_2AL_79AD48080.1	heparan-alpha-glucosaminide N-acetyltransferase
	0.2	Traes_2DS_7B7201B62.1	2,4-dihydroxy-1,4-benzoxazin-3-one-glucoside dioxygenase
	1.8	Traes_3AL_C0B6CE358.1	F-box and leucine-rich repeat protein 2/20
	1.2	Traes_6BL_102D3B9FB.2	serine/threonine-protein phosphatase 2B regulatory subunit
	2.5	Traes_1BL_D7214C937.1	--
	2	Traes_5BL_2A38F1702.2	17beta-estradiol 17-dehydrogenase / very-long-chain 3-oxoacyl-CoA reductase
	0.2	Traes_7AL_076CFDA60.1	nitrate reductase (NAD(P)H)
	2	Traes_4BL_87A244E73.2	--
	2.5	Traes_6AS_3AC3DD191.3	kelch-like protein 2/3
	2	Traes_1AL_1E7404054.1	leucyl-tRNA synthetase
	2.5	Traes_4AL_81AAFD885.1	--
	0	Traes_6AS_7EC900F2F.1	LRR receptor-like serine/threonine-protein kinase FLS2
	2.5	Traes_1DL_547D8DAC2.1	MFS transporter, SP family, solute carrier family 2 (myo-inositol transporter), member 13
	2.5	Traes_6BL_C7603640E.1	mitotic spindle assembly checkpoint protein MAD1
	0.5	Traes_7BS_9B69EEDDB.2	protein regulator of cytokinesis 1
	2	Traes_4BS_8C6ADCEDA.1	--
	1	Traes_6DS_016F70618.2	--
	2	Traes_1AL_38EEA508C.1	auxin influx carrier (AUX1 LAX family)
	1.5	Traes_4AL_C777CFC24.2	uridine nucleosidase
novel_mir_1306	2.5	Traes_1DL_04FFC7E48.1	DNA-directed RNA polymerase I subunit RPA2
	2.5	Traes_1AL_6F1907FF4.1	DNA-directed RNA polymerase I subunit RPA2
novel_mir_1327	2	Traes_3AL_D426C4603.1	hyperpolarization activated cyclic nucleotide-gated potassium channel 4
	1.8	Traes_7BL_1F55F4E80.1	--
	2	Traes_3DL_8D6F782B1.2	hyperpolarization activated cyclic nucleotide-gated potassium channel 4
	2	Traes_7DL_F27BBA722.2	ATP-dependent DNA helicase HFM1/MER3
novel_mir_1356	1.2	Traes_6DS_731D6507E.1	mTERF domain-containing protein, mitochondrial
	2.5	Traes_3DL_AD55573CF.2	alpha-1,3-mannosyl-glycoprotein beta-1,2-N-acetylglucosaminyltransferase
	2	Traes_6BS_7F1846171.1	mTERF domain-containing protein, mitochondrial
	1.8	Traes_1BS_613E9DBA6.3	mTERF domain-containing protein, mitochondrial
	2	Traes_6AS_0A4ECA583.1	mTERF domain-containing protein, mitochondrial
	0.5	Traes_1AL_3C796C3D3.1	mTERF domain-containing protein, mitochondrial
	1	Traes_6BS_2F108C5BB.1	mTERF domain-containing protein, mitochondrial
	2	Traes_7BS_F3F4F9276.1	mTERF domain-containing protein, mitochondrial
	2	Traes_3AL_FCD4C03D1.2	beta-glucosidase
	2	Traes_6DS_3F194116E.1	mTERF domain-containing protein, mitochondrial
	1	Traes_6AS_2947CC609.1	mTERF domain-containing protein, mitochondrial
	2.5	Traes_6DS_96086C082.1	elongation factor 1-alpha
	2	Traes_6AS_EBADF37C7.1	mTERF domain-containing protein, mitochondrial
	2.2	Traes_1BS_566CEE7F6.1	mTERF domain-containing protein, mitochondrial
	2.5	Traes_7AS_599E30842.3	G patch domain-containing protein 1
	1.5	Traes_6AS_F7B50CFC61.1	mTERF domain-containing protein, mitochondrial
	2.2	TRAES3BF155100020CFD_t1	mTERF domain-containing protein, mitochondrial
	1	Traes_6DS_EF75D5C67.1	mTERF domain-containing protein, mitochondrial
	1	Traes_6AS_A2EAE01C1.1	mTERF domain-containing protein, mitochondrial
	1.5	Traes_3AS_D6334436F.4	mTERF domain-containing protein, mitochondrial
	2	Traes_6DS_A2E0A29DE.1	mTERF domain-containing protein, mitochondrial
	1	Traes_6AS_6612DF8D7.3	mTERF domain-containing protein, mitochondrial
	1.2	Traes_5AL_C7EAE22CC.1	mTERF domain-containing protein, mitochondrial
	1	Traes_6BS_D86C76539.1	mTERF domain-containing protein, mitochondrial
	2	Traes_7DS_26E639A91.1	mTERF domain-containing protein, mitochondrial
	2.5	Traes_7DL_F50060F73.1	phospholipid:diacylglycerol acyltransferase
	1	Traes_6DS_3FC2ADA87.1	mTERF domain-containing protein, mitochondrial
	0.8	Traes_5BL_4B55FFD72.2	mTERF domain-containing protein, mitochondrial
	2.2	Traes_6BS_82F5BF11F.1	mTERF domain-containing protein, mitochondrial
	0.5	Traes_6AS_E48EF5A7A.1	mTERF domain-containing protein, mitochondrial
	1	Traes_6AS_7B7540F6D.1	mTERF domain-containing protein, mitochondrial
	2	Traes_6DS_883C011AD.1	mTERF domain-containing protein, mitochondrial
	1	Traes_6DS_BF460054E.1	mTERF domain-containing protein, mitochondrial
	2.5	Traes_1DL_96086C082.1	elongation factor 1-alpha
	0.5	Traes_5BL_B26F674CF.1	mTERF domain-containing protein, mitochondrial
	1.5	Traes_1DL_97426F3D9.3	mTERF domain-containing protein, mitochondrial
	2.2	Traes_6BS_577217561.1	mTERF domain-containing protein, mitochondrial
	2.5	Traes_7BL_459346AF7.1	--
	1.5	Traes_6BS_A5FB0FF9D.1	mTERF domain-containing protein, mitochondrial
	2	Traes_6AS_E6F39D946.2	mTERF domain-containing protein, mitochondrial
	1.2	Traes_6BS_1E0D70258.1	mTERF domain-containing protein, mitochondrial
	1	Traes_6AS_3AFC735F7.1	mTERF domain-containing protein, mitochondrial
	1.8	Traes_6BS_14F4A31C5.1	mTERF domain-containing protein, mitochondrial
	1.5	Traes_6BS_078313C71.1	mTERF domain-containing protein, mitochondrial
	2	Traes_4AL_3A009739E.1	mTERF domain-containing protein, mitochondrial
	2.5	Traes_6DS_2185308F3.1	mTERF domain-containing protein, mitochondrial
	1	Traes_6BS_C3247654A.1	mTERF domain-containing protein, mitochondrial
	2	Traes_3B_7E0C70389.1	interleukin-1 receptor-associated kinase 4
	2	Traes_5DL_D58768AC8.1	interleukin-1 receptor-associated kinase 4
	2	Traes_6AS_1496A7825.1	mTERF domain-containing protein, mitochondrial
	2	Traes_6DS_3D1A837E3.1	mTERF domain-containing protein, mitochondrial
	1.2	Traes_5DL_02477C27A.1	mTERF domain-containing protein, mitochondrial
	1	Traes_6AS_15C1E6F18.2	mTERF domain-containing protein, mitochondrial
	2	Traes_6AS_EE73C76541.2	mTERF domain-containing protein, mitochondrial
	0.8	Traes_5DL_7643B2ADB.1	mTERF domain-containing protein, mitochondrial
	2.5	Traes_3DL_E5EE243B0.1	formin 2
	1.8	Traes_3DL_714316B91.2	beta-glucosidase
	1	Traes_6BS_276ACF176.1	mTERF domain-containing protein, mitochondrial
	1.2	Traes_6AS_0A204AEC9.2	mTERF domain-containing protein, mitochondrial
	2.2	Traes_6DS_9E1F83202.1	mTERF domain-containing protein, mitochondrial
	0.8	Traes_6BS_CC20739DE.1	mTERF domain-containing protein, mitochondrial
	2.2	Traes_2BL_691925EC1.1	mTERF domain-containing protein, mitochondrial
	1	Traes_6DS_1CC9DD1EC.1	mTERF domain-containing protein, mitochondrial
	0.5	Traes_2DL_BE754F0C1.1	mTERF domain-containing protein, mitochondrial
	2	Traes_3DL_1E1F54063.1	interleukin-1 receptor-associated kinase 4
	0.5	Traes_1BL_37FA9C770.1	mTERF domain-containing protein, mitochondrial
	0.8	Traes_6AS_480364CD5.1	mTERF domain-containing protein, mitochondrial
	2.2	Traes_6BS_A303CDF0B.1	mTERF domain-containing protein, mitochondrial
	2	Traes_6BL_4159688FC.1	mTERF domain-containing protein, mitochondrial
	0.5	Traes_2BL_428FAB7F7.1	mTERF domain-containing protein, mitochondrial
	2.5	TRAES3BF272100020CFD_t1	alpha-1,3-mannosyl-glycoprotein beta-1,2-N-acetylglucosaminyltransferase
	2	Traes_1BL_4CAB28F5F.1	mTERF domain-containing protein, mitochondrial
	1.2	Traes_6AS_29B3E9858.1	mTERF domain-containing protein, mitochondrial
	1.5	Traes_2BS_257C5B0991.1	mTERF domain-containing protein, mitochondrial
	1.5	Traes_6DS_2D4EFFF3E.1	mTERF domain-containing protein, mitochondrial
	2	Traes_4BL_29D8171E0.1	mTERF domain-containing protein, mitochondrial
	2	Traes_5DL_A9969D596.1	mTERF domain-containing protein, mitochondrial
	1	Traes_2BS_0D569FC2A.1	mTERF domain-containing protein, mitochondrial
	1.5	Traes_2BS_257C5B099.1	mTERF domain-containing protein, mitochondrial
	1.5	Traes_6DS_93C7DA226.1	mTERF domain-containing protein, mitochondrial
	1.5	Traes_5DS_16F2A41E2.1	mTERF domain-containing protein, mitochondrial
	2	Traes_6DS_F6C7E588F.1	mTERF domain-containing protein, mitochondrial
	1.5	Traes_6BS_938E60C80.1	mTERF domain-containing protein, mitochondrial
	1.2	Traes_6DS_79BC66C99.1	mTERF domain-containing protein, mitochondrial
	1.5	Traes_6BS_AEF9F3C00.3	mTERF domain-containing protein, mitochondrial
	2.5	TRAES3BF104500030CFD_t1	formin 2
	2	Traes_6AS_8D2111A83.5	mTERF domain-containing protein, mitochondrial
	1.5	Traes_1DL_5E046EFA0.1	mTERF domain-containing protein, mitochondrial
	1	TRAES3BF261600050CFD_t1	mTERF domain-containing protein, mitochondrial
	2	Traes_7AS_1E81E97A0.1	mTERF domain-containing protein, mitochondrial
	1	Traes_6DS_A490DF33E.1	mTERF domain-containing protein, mitochondrial
	1.5	Traes_4BS_257C5B099.1	mTERF domain-containing protein, mitochondrial
	2.2	Traes_1AL_C6CACDF78.1	mTERF domain-containing protein, mitochondrial
	2.5	Traes_3AL_720EF3690.2	elongation factor 1-alpha
	2.5	Traes_2BS_87944581C.1	mTERF domain-containing protein, mitochondrial
	1	Traes_5DS_9F4A5AE9F.1	mTERF domain-containing protein, mitochondrial
	2.5	Traes_3DL_96847DCCF.2	interleukin-1 receptor-associated kinase 4
	1	Traes_6AS_D5A6B2CDD.1	mTERF domain-containing protein, mitochondrial
	1.2	Traes_4AL_A4B73CC6A1.2	mTERF domain-containing protein, mitochondrial
	2	Traes_3AL_3CA8601C3.3	interleukin-1 receptor-associated kinase 4
	1.5	Traes_6DS_48337A953.3	mTERF domain-containing protein, mitochondrial
	1	Traes_6DS_422644406.1	mTERF domain-containing protein, mitochondrial
	1	Traes_6AS_2FC18A5B9.6	mTERF domain-containing protein, mitochondrial
	1.5	Traes_6AS_3641B9C871.1	mTERF domain-containing protein, mitochondrial
	1.5	Traes_6AS_2BDC1663A.1	mTERF domain-containing protein, mitochondrial
	2	Traes_6DS_7D3BEF6A9.2	mTERF domain-containing protein, mitochondrial
	2.5	Traes_6BS_F8176B2AA.1	mTERF domain-containing protein, mitochondrial
	2	Traes_6BS_1AE1C47BC.15	mTERF domain-containing protein, mitochondrial
	0.5	Traes_6DS_8A0136580.1	mTERF domain-containing protein, mitochondrial
	1	Traes_1DL_0CDB6989D.1	mTERF domain-containing protein, mitochondrial
	1.5	Traes_2BS_74269A4C5.1	mTERF domain-containing protein, mitochondrial
	2	Traes_6BS_1BBAEAFA71.2	mTERF domain-containing protein, mitochondrial
	1.2	Traes_6AS_B24138E62.1	mTERF domain-containing protein, mitochondrial
	1	Traes_6BS_E71FD70EE1.1	mTERF domain-containing protein, mitochondrial
	2	Traes_6BS_843505CB3.5	mTERF domain-containing protein, mitochondrial
	2.5	Traes_7BL_75414ED32.1	phospholipid:diacylglycerol acyltransferase
	2.2	Traes_2DL_69016B703.1	mTERF domain-containing protein, mitochondrial
	2	Traes_3DL_648BA7F00.1	mTERF domain-containing protein, mitochondrial
	2.5	Traes_3AL_E01D0B52D.1	formin 2
	2.5	Traes_3AL_14FC597EB.1	interleukin-1 receptor-associated kinase 4
	1	Traes_1BL_A8B8F33D9.1	mTERF domain-containing protein, mitochondrial
	2	Traes_6BS_EE1BBAFD1.1	mTERF domain-containing protein, mitochondrial
	2	Traes_5BL_6E99418D1.1	interleukin-1 receptor-associated kinase 4
	2.5	Traes_6DS_186AD71E4.1	mTERF domain-containing protein, mitochondrial
	1	Traes_6DS_C67E0A030.1	mTERF domain-containing protein, mitochondrial
	1.5	Traes_6BS_25F5046E7.1	mTERF domain-containing protein, mitochondrial
	1	Traes_6AS_073DEE100.1	mTERF domain-containing protein, mitochondrial
	1.5	Traes_2BS_DDF26C784.1	mTERF domain-containing protein, mitochondrial
	2.5	Traes_2BL_2FA9E1893.1	mTERF domain-containing protein, mitochondrial
	2	Traes_6DS_FB434BB3C.2	mTERF domain-containing protein, mitochondrial
	2.5	TRAES3BF181700010CFD_t1	mTERF domain-containing protein, mitochondrial
	1.2	Traes_5BL_C79594291.1	mTERF domain-containing protein, mitochondrial
	1.5	Traes_6AS_8F6522734.1	mTERF domain-containing protein, mitochondrial
	1	Traes_6DS_2ED8299A11.1	mTERF domain-containing protein, mitochondrial
	2.5	Traes_6AS_EE8BA0A57.2	mTERF domain-containing protein, mitochondrial
	1	Traes_5DS_094A03C13.1	mTERF domain-containing protein, mitochondrial
	2	Traes_6AS_B211B0425.1	mTERF domain-containing protein, mitochondrial
	2	Traes_7DL_BF855D6F9.1	phospholipid:diacylglycerol acyltransferase
	1.8	TRAES3BF181700020CFD_t1	mTERF domain-containing protein, mitochondrial
	2.5	Traes_3AL_3FA58F1B7.2	alpha-1,3-mannosyl-glycoprotein beta-1,2-N-acetylglucosaminyltransferase
	0.5	Traes_6AS_CC8B21340.1	mTERF domain-containing protein, mitochondrial
	2.5	Traes_6BS_2AC6A2287.1	mTERF domain-containing protein, mitochondrial
	1	Traes_6BS_28F0D2955.1	mTERF domain-containing protein, mitochondrial
	2.5	Traes_6BS_CBD931158.4	mTERF domain-containing protein, mitochondrial
	1	Traes_6DS_E65BDAC1F.1	mTERF domain-containing protein, mitochondrial
	1.5	Traes_6AS_F7B50CFC6.1	mTERF domain-containing protein, mitochondrial
	2	TRAES3BF089000130CFD_t1	mTERF domain-containing protein, mitochondrial
	1.8	Traes_6BS_7C28F07CE.1	mTERF domain-containing protein, mitochondrial
	1.8	Traes_6DL_CDFDE8B3D.2	--
	1.5	Traes_6DS_93C7DA2261.1	mTERF domain-containing protein, mitochondrial
	1	Traes_6BS_B8A0BF56F.2	mTERF domain-containing protein, mitochondrial
	2	Traes_6DS_EAB8901AD.1	mTERF domain-containing protein, mitochondrial
	1.5	Traes_6AS_36EAEADDD.3	mTERF domain-containing protein, mitochondrial
	1	Traes_6DS_0E84AAF77.1	mTERF domain-containing protein, mitochondrial
	1.5	Traes_6AS_F1919325C.1	mTERF domain-containing protein, mitochondrial
	0.5	Traes_6DS_3A1EA267A.17	mTERF domain-containing protein, mitochondrial
	1.8	Traes_6BS_508C2BEA2.1	mTERF domain-containing protein, mitochondrial
	1.5	Traes_3B_224A6B7E5.1	mTERF domain-containing protein, mitochondrial
	2.2	Traes_4AL_76CB2DE24.1	mTERF domain-containing protein, mitochondrial
	2	Traes_5AL_DB9E0AA8D.1	mTERF domain-containing protein, mitochondrial
	1	Traes_6DS_64DD7BAA2.1	mTERF domain-containing protein, mitochondrial
novel_mir_1481	2.5	TRAES3BF094400080CFD_t1	cytoskeleton-associated protein 5
novel_mir_1559	1.8	Traes_4DS_E4442B2FF.1	transcription factor MYC2
	1.5	Traes_2DL_24888A074.1	protein transport protein SEC24
	1	Traes_6AL_8394C0D62.1	peptidyl-prolyl isomerase E (cyclophilin E)
	1.5	Traes_7BL_4C45F5D62.1	UDP-sugar pyrophosphorylase
	0	Traes_1DL_DDCF517E1.1	--
	1.5	Traes_4AS_5EDE61425.2	--
	2	Traes_2DS_E6EDAED7B.1	peroxidase
	1.5	Traes_2DS_F438957FE.1	leucine-rich PPR motif-containing protein, mitochondrial
	0.5	Traes_3DL_71B7E80D2.1	protein phosphatase 2C
	2	Traes_6BL_F03DF2949.2	signal peptide peptidase-like 2B
	2	Traes_1DL_14CCD1497.2	phosphoglycerate kinase
	1	Traes_2AL_1E3B3BC40.2	--
	0	Traes_6BL_A5A986E6C.1	26S proteasome regulatory subunit N7
	2.5	Traes_4AS_6C23CE2D6.1	nuclear cap-binding protein subunit 1
	2.5	Traes_7DL_C1366F921.1	pentatricopeptide repeat domain-containing protein 1
	1.5	Traes_7DL_FBE9894EB.1	--
	1.5	Traes_6BL_E1793636C.1	MADS-box transcription factor, plant
	1	Traes_5BL_82E45824C.1	--
	0.5	Traes_1DL_CC4D484BB.5	--
	0.8	Traes_2DS_9BCFF2B80.1	--
	0	Traes_7BL_002EE3EC3.1	--
	1.5	Traes_2DS_9520F146E.1	L-ascorbate oxidase
	1.8	Traes_2DS_8A873A037.2	nucleoprotein TPR
	1.5	Traes_2BL_A687959FB.2	non-specific serine/threonine protein kinase
	1.8	Traes_5BL_09F92E35C.1	E3 SUMO-protein ligase PIAS1
	0	Traes_7BS_9B69EEDDB.2	protein regulator of cytokinesis 1
	2	Traes_5AS_A977349961.2	F-box and leucine-rich repeat protein 2/20
	0	Traes_7AL_076CFDA60.1	nitrate reductase (NAD(P)H)
	1.5	Traes_1AL_7FE24229E.2	protein KRI1
	0.5	Traes_1AL_43F02DB49.1	dolichyl-diphosphooligosaccharide--protein glycosyltransferase
	2.5	Traes_6AS_A4F79095B.1	RNA polymerase I-specific transcription initiation factor RRN3
	1.5	Traes_4BL_A71648154.1	3-ketoacyl-CoA synthase
	1.8	Traes_2BL_09184B677.2	TatD DNase family protein
	1.5	Traes_5AS_98B9EF5B2.1	--
	1	Traes_2AL_1D6C6AF21.4	--
	2.5	Traes_3DL_4A579C5AE.2	4-diphosphocytidyl-2-C-methyl-D-erythritol kinase
	0	Traes_7BL_8A0171EF6.1	--
	0	Traes_4BS_E52BF8FF4.1	--
	2	Traes_1DL_DC61DA172.1	cytochrome P450, family 26, subfamily A
	1	Traes_6DL_38B41C198.1	--
	1	Traes_5BL_756B1DFCF.7	5'-AMP-activated protein kinase, catalytic alpha subunit
	2.5	Traes_1DL_06B73F05D.1	--
	0.2	Traes_7BS_BA937B73D.2	2,3-bisphosphoglycerate-dependent phosphoglycerate mutase
	1.5	Traes_7AL_96383AEEC.1	glucuronoxylan 4-O-methyltransferase
	2	Traes_2BL_260DF778A.1	polyadenylate-binding protein
	0.2	Traes_7BL_EAB933665.1	--
	2	Traes_6BS_CBD931158.4	mTERF domain-containing protein, mitochondrial
	2	Traes_5AL_670A84226.3	--
	1.5	Traes_2DS_C8CC2F963.1	ATP-dependent RNA helicase DDX21
	1.5	Traes_5DL_DDCD2701D.1	serine/threonine-protein phosphatase 2A regulatory subunit B'
	2	Traes_2BS_A87D49831.1	pyruvate dehydrogenase kinase 2/3/4
	2.5	Traes_1BS_D81E948D7.1	histone acetyltransferase
	0.2	Traes_4AS_70BE0A0AB.1	jasmonate ZIM domain-containing protein
	2.2	Traes_4BS_481E26C44.1	--
	2	Traes_2AL_79AD48080.1	heparan-alpha-glucosaminide N-acetyltransferase
	1.5	Traes_7DS_5A117F2B1.2	achilleol B synthase
	2.2	Traes_3AL_2EB43ADE9.2	atypical dual specificity phosphatase
	2	Traes_3B_A84ED9D40.1	nuclear transcription Y subunit beta
	1.5	Traes_5BL_FD504C45C.1	uncharacterized protein
	2	Traes_5BL_8FFD203BD.1	ubiquitin-like protein Nedd8
	0	Traes_7DL_EFB19C389.1	--
	2	Traes_7DS_649C86819.1	--
	0.8	Traes_7DL_68CB1808C.1	interleukin-1 receptor-associated kinase 1
	1.5	Traes_3AL_20404D7E4.1	mitochondrial-processing peptidase subunit alpha
	1.5	Traes_1BL_99CE41F50.1	magnesium transporter
	1	Traes_4DS_FEAA10316.1	DELLA protein
	1	Traes_6BS_D8B7C37B0.2	mTERF domain-containing protein, mitochondrial
	1.2	Traes_2BS_748FD4958.1	queuine tRNA-ribosyltransferase subunit QTRTD1
	1	Traes_7DL_ACACA513D.2	transcriptional repressor NF-X1
	0	Traes_3AS_0E7CB4B4A.2	sentrin-specific protease 1
	2.5	Traes_7DS_1797D4951.1	pathogenesis-related protein 1
	0.8	Traes_2DL_7679795E3.2	heterogeneous nuclear ribonucleoprotein G
	2	Traes_3AL_09BDFC4B4.2	--
	0	Traes_4AS_35A112009.2	--
	2.5	Traes_5AL_637B13721.2	--
	1	Traes_4DS_990D31BB1.6	elongation factor 1-alpha
	1.8	Traes_4AL_81AAFD885.1	--
	1.5	Traes_4BS_AD0C0BB89.1	1-phosphatidylinositol-3-phosphate 5-kinase
	1.5	Traes_1BL_7C8FD5930.1	interleukin-1 receptor-associated kinase 4
	1	Traes_2DL_A270533A81.1	--
	1	Traes_2DL_7D7B1B55D.1	1-deoxy-D-xylulose-5-phosphate synthase
	1.5	Traes_1DL_3873CDB4B.2	alpha-1,4-galacturonosyltransferase
	2	Traes_3DS_C15BBC2CB.1	--
	2	Traes_5BL_E2E0C1A3F.3	poly(rC)-binding protein 2/3/4
	2	Traes_7BS_C541DF41A.1	pre-mRNA-processing factor 8
	0.2	Traes_2AS_DACE53B24.2	(S)-2-hydroxy-acid oxidase
	0.8	Traes_3DL_1E1B2925F.1	carboxymethylenebutenolidase
	2.5	Traes_1AL_5F778FAAB.1	--
	1	Traes_2AL_240AD61B7.1	--
	0.5	Traes_1AS_FE5279B08.1	ubiquitin-conjugating enzyme E2 O
	2	Traes_6AS_1537629B3.1	heat shock transcription factor, other eukaryote
	0.5	Traes_4AS_265BF3644.1	syntaxin-binding protein 5
	0	Traes_6BL_45831D6F8.1	CUG-BP- and ETR3-like factor
	1.5	Traes_2BL_07C9811CB.1	--
	1.5	Traes_7BS_941D0F9E7.1	--
	1.2	Traes_3B_D3F75F9E9.1	zinc finger protein
	1.5	Traes_4AL_A99729A05.2	FUS-interacting serine-arginine-rich protein 1
	1.8	Traes_4AS_71B1DAAE4.1	F-type H+-transporting ATPase subunit b
	1.5	Traes_3DS_FA579628B.1	crossover junction endonuclease MUS81
	1.5	Traes_1AL_38EEA508C.1	auxin influx carrier (AUX1 LAX family)
	1	Traes_1AL_1E7404054.1	leucyl-tRNA synthetase
	1.2	Traes_5AL_1311205EE.2	sacsin
	1.5	Traes_2BL_14B133AEB.1	fructose-bisphosphate aldolase, class I
	0	Traes_6AS_F3191CE3B.1	--
	2	Traes_5AL_2C26B1FFC.1	E3 ubiquitin-protein ligase RNF38/44
	1.5	Traes_5AL_1C1842EF9.1	OPC-8:0 CoA ligase 1
	0	Traes_5BL_769E8EB68.1	--
	2.5	Traes_1DL_547D8DAC2.1	MFS transporter, SP family, solute carrier family 2 (myo-inositol transporter), member 13
	1.2	Traes_4DL_73FAC8F36.1	--
	0.5	Traes_5AS_E1F692526.1	SWI/SNF related-matrix-associated actin-dependent regulator of chromatin subfamily C
	1.5	Traes_1BL_1FE978865.2	AP-2 complex subunit mu-1
	1	Traes_5DS_07A2D59F5.3	--
	2.5	Traes_1BL_63F0F0FAA.1	--
	1.5	Traes_7AS_E43D64A80.2	disease resistance protein RPM1
	1.5	Traes_5DL_A061F2DD6.1	abnormal spindle-like microcephaly-associated protein
	2.5	Traes_4DL_6FC6B26E7.2	guanylate kinase
	1	Traes_3AL_C0B6CE358.1	F-box and leucine-rich repeat protein 2/20
	1.2	Traes_2AS_45A0E50BF.1	serine/threonine-protein phosphatase 5
	1.5	Traes_6BL_9E43B8FCD.1	--
	1	Traes_7AL_FFC5B8676.1	--
	1.5	Traes_2AS_B365561A9.2	--
	0	Traes_1BL_65D58F997.6	--
	2.5	Traes_5DS_BA8613E74.1	--
	2	Traes_6DS_016F70618.2	--
	1.5	Traes_3AL_88DD697D6.1	farnesol kinase
	1.5	Traes_6BS_FDDC181D1.1	20S proteasome subunit alpha 6
	0	Traes_3DL_3E215D878.2	delta-1-pyrroline-5-carboxylate synthetase
	1.2	Traes_2DS_D014BDCA2.1	pectinesterase
	2.2	Traes_2BS_48B2AB466.1	--
	0	Traes_7AL_EAA637F04.1	(S)-coclaurine N-methyltransferase
	0	Traes_5DL_6ADDEBB8B.1	photosystem II 13kDa protein
	2.5	Traes_5AL_DF67B2B34.1	--
	1	Traes_1BL_D7214C937.1	--
	0.2	Traes_4AL_42B8CC574.3	cytokinin trans-hydroxylase
	1.8	Traes_4BL_87A244E73.2	--
	0.2	Traes_6AL_686E9F639.1	magnesium/proton exchanger
	0	Traes_3DL_838442186.1	U3 small nucleolar RNA-associated protein 11
	1	Traes_3B_F66658675.1	interleukin-1 receptor-associated kinase 4
	1	Traes_4DL_9F7C8C343.1	sucrose synthase
	1	Traes_7DL_1D591BE1B.1	E3 ubiquitin-protein ligase Arkadia
	2	Traes_6DL_A95013422.2	sn1-specific diacylglycerol lipase
	2	Traes_6BS_812D3A692.1	mTERF domain-containing protein, mitochondrial
	1.5	Traes_1DL_C5F65B9D4.2	disease resistance protein RPS2
	0	Traes_6BL_102D3B9FB.2	serine/threonine-protein phosphatase 2B regulatory subunit
	1.5	Traes_7AL_4E998FAC1.1	--
	0.5	Traes_2AS_607E72B1A.1	2,4-dihydroxy-1,4-benzoxazin-3-one-glucoside dioxygenase
	1.5	Traes_2DL_3C9129432.1	ribosome assembly protein RRB1
	0	Traes_2DS_7B7201B62.1	2,4-dihydroxy-1,4-benzoxazin-3-one-glucoside dioxygenase
	0.5	Traes_7DL_73928596C.1	14-3-3 protein epsilon
	1	Traes_6AS_CF374995B.1	Xaa-Pro dipeptidase
	1.5	Traes_7BS_E3E8C9AAE.1	signal recognition particle receptor subunit beta
	0	Traes_6AS_7EC900F2F.1	LRR receptor-like serine/threonine-protein kinase FLS2
	1	Traes_4AL_C777CFC24.2	uridine nucleosidase
novel_mir_1576	2.5	Traes_2AL_F001B4F26.1	polyadenylate-binding protein
	2.5	Traes_2AL_CB84F42D2.2	polyadenylate-binding protein
novel_mir_1615	2.2	Traes_5BL_C83F945F6.2	--
	1.5	Traes_7AS_C87C2FF27.1	--
novel_mir_1620	0	Traes_1AL_D6D6DDE5E.1	cell division cycle 2-like
	2.5	Traes_3DS_21967DB06.2	--
novel_mir_1634	2.5	Traes_2BL_4DDD8C395.1	25S rRNA (uracil2634-N3)-methyltransferase
novel_mir_1786	2.5	Traes_1DS_CA7098EDC.1	ubiquitin-protein ligase E3 C
	2.5	Traes_1AS_AEEC8D740.1	ubiquitin-protein ligase E3 C
	2.5	Traes_1BS_D11AB25D6.1	ubiquitin-protein ligase E3 C
novel_mir_1791	2.5	Traes_6BS_768A01DF4.2	stromal membrane-associated protein
novel_mir_1818	1.5	Traes_2AL_D7BC14E66.1	--
	2	Traes_2DS_6C666AF49.1	elongation factor 1 alpha-like protein
	2.2	Traes_2BS_E22CEEBFF.1	--
	2	Traes_2DL_9A5A4BC64.1	--
	2	Traes_2BL_2321BA77B.1	--
	2.2	Traes_7DS_AE670763E.1	mannan endo-1,4-beta-mannosidase
novel_mir_1890	0.8	Traes_4AL_CDBA6A025.2	rhamnogalacturonan II specific xylosyltransferase
	0	Traes_4AL_74A0F59A6.1	--
	0	Traes_2BS_4EAB8F3C5.1	palmitoyltransferase
	1.8	Traes_3DL_8F17D7E07.1	oligosaccharyltransferase complex subunit delta (ribophorin II)
	0.2	Traes_3AL_6AA4514CE.1	leucine-rich PPR motif-containing protein, mitochondrial
	2	TRAES3BF052800020CFD_t1	DNA polymerase alpha subunit A
	1.8	Traes_3AL_CE7C379BA.2	oligosaccharyltransferase complex subunit delta (ribophorin II)
	1	Traes_2AL_24A1BF00C.1	cold-inducible RNA-binding protein
	2.2	Traes_3AL_4A93BA5FF.1	myosin V
	0	Traes_5AS_DD6B14864.1	casein kinase 1, delta
	0	Traes_5BL_245A319AD.1	--
	2	Traes_3DL_B63AF687B.1	DNA polymerase alpha subunit A
	0.2	Traes_1BS_9FDB4C9EC.1	DnaJ homolog subfamily B member 11
	0.2	Traes_7BL_A7BC41079.1	--
	2	Traes_1DS_7A5713DED.1	interleukin-1 receptor-associated kinase 1
	2	Traes_3AL_CF8C54319.1	DNA polymerase alpha subunit A
	0.2	Traes_4BL_1BBF712A1.1	pyruvate kinase
	0.2	Traes_4AL_0CBF57B3F.1	poly(rC)-binding protein 2/3/4
	1	Traes_7BL_625F55A12.1	--
	0.2	Traes_1DS_35954E987.1	ethylene receptor
	2.5	Traes_3AS_54A64D009.1	UV excision repair protein RAD23
	0	Traes_2BS_6C1E65A63.2	--
	1.8	TRAES3BF066400040CFD_t1	oligosaccharyltransferase complex subunit delta (ribophorin II)
novel_mir_2129	2.5	Traes_2AL_4199CA92D.2	pre-rRNA-processing protein TSR4
	2.5	Traes_2BL_9B339C169.1	pre-rRNA-processing protein TSR4
	2	Traes_1DS_0A2C2B665.1	--
	2.5	Traes_1AL_EE234DBDA.2	E3 ubiquitin-protein ligase SIAH1
	2.2	Traes_2BL_8CB65EA1B.1	--
	2	Traes_1BS_2649E3831.1	--
	2.5	Traes_2DL_195C166BE.1	pre-rRNA-processing protein TSR4
novel_mir_354	2.5	Traes_5BL_1992B070F.1	--
novel_mir_450	2	Traes_2BS_6DB91427E.2	topoisomerase (DNA) II binding protein 1
	2	TRAES3BF041300030CFD_t1	--
	2.5	Traes_1AL_C91CA472B.1	RAT1-interacting protein
	1.5	Traes_1DL_3D0C8C358.2	--
	2.2	Traes_7BL_850250C2D.1	U3 small nucleolar ribonucleoprotein protein IMP4
	2.5	Traes_1BL_580F7E060.1	RAT1-interacting protein
	0.5	Traes_7BL_D5BBB846B.1	isoleucyl-tRNA synthetase
	1.5	Traes_3AL_9E170BA39.2	leucine-rich PPR motif-containing protein, mitochondrial
	2	Traes_1AS_16318D86C.2	--
	0.5	Traes_7DL_926D6088C.1	isoleucyl-tRNA synthetase
	2.5	Traes_1DL_A56DAF04E.1	RAT1-interacting protein
	2.5	Traes_7AL_1D8EE9709.1	serine/threonine-protein kinase TNNI3K
	2.5	Traes_2DL_776B9B786.1	E3 ubiquitin-protein ligase RNF13
	1.5	Traes_3DL_75BB42AD6.5	leucine-rich PPR motif-containing protein, mitochondrial
	2	Traes_6BS_F2814D3D4.2	mitochondrial import inner membrane translocase subunit TIM22
	1	Traes_1BL_4EDA0586D.1	alpha-galactosidase
novel_mir_465	2.5	Traes_3DL_1652E03C0.1	26S proteasome non-ATPase regulatory subunit 10
	2.5	Traes_2BS_EE62A3C6C.1	large subunit ribosomal protein L28
	0.5	Traes_2BS_4914C7128.1	--
	2.5	Traes_5AL_236DA3851.1	--
	1.8	Traes_6BS_8EB9E6EC7.2	disease resistance protein RPM1
	2	Traes_2BL_BC038628B.1	heat shock transcription factor, other eukaryote
	2.2	Traes_1AL_3F65EE35A.1	tetraspanin-5
	2	Traes_1AL_42189A8B0.2	--
	2.5	Traes_6DL_9CFB8853B.1	callose synthase
	1.8	Traes_1AS_6C2BED457.1	--
	2.5	Traes_6BL_C83912BDE.1	serine palmitoyltransferase
	2.5	Traes_2BS_F698CECA3.2	photosystem II oxygen-evolving enhancer protein 3
	2.5	Traes_5DS_0E203025F.2	--
	1.5	Traes_7BL_56B80DB6F.1	meiotic recombination protein SPO11
	1.8	Traes_1AS_7AB089C23.1	--
	2.5	Traes_2AS_A98A48472.2	--
	1.8	Traes_3DS_DEE900F71.1	--
	2.5	Traes_7DS_A32326691.1	type II pantothenate kinase
	1.5	Traes_5BS_AE8F8B4E8.1	--
	2.5	Traes_3AS_7C8563F80.1	transcription factor IIIB 90 kDa subunit
	2	Traes_6AL_BBEF24273.2	anaphase-promoting complex subunit 4
	0.5	Traes_6AL_C13753B31.1	myb proto-oncogene protein, plant
	2.5	Traes_6BL_304092BEE.1	callose synthase
	2.5	Traes_3AL_82BE18699.2	E3 ubiquitin-protein ligase BRE1
	2	Traes_3AL_9F4685A4E.1	large subunit ribosomal protein L15
	2.5	Traes_5AL_6946D4AF8.3	interleukin-1 receptor-associated kinase 1
novel_mir_546	2	Traes_7AS_164E878E5.1	--
	1.8	Traes_5AL_19CAC395E.1	leucine-rich PPR motif-containing protein, mitochondrial
	1.8	Traes_5DL_0FE06DB03.1	leucine-rich PPR motif-containing protein, mitochondrial
	1.8	Traes_5BL_BC1FE01E8.1	leucine-rich PPR motif-containing protein, mitochondrial
	2.2	Traes_2DS_62AF704FC.1	nuclear transcription factor Y, alpha
novel_mir_658	2.5	Traes_5BL_1992B070F.1	--
	2	Traes_2AL_E39ADEE0D.2	ATP-dependent RNA helicase
	2	Traes_4BL_6C9784114.1	pseudouridine-5'-phosphate glycosidase
	2	Traes_4DL_4CEB3B04C.1	pseudouridine-5'-phosphate glycosidase
novel_mir_84	1	Traes_7AL_61C51C0CD.1	LETM1 and EF-hand domain-containing protein 1, mitochondrial
	0	Traes_1DL_BA95A7496.1	uncharacterized protein
	2.5	Traes_3AL_20404D7E4.1	mitochondrial-processing peptidase subunit alpha
	0.5	Traes_7AL_A2D163F33.1	aminopeptidase N
	1	Traes_4AS_512DDDECB.2	zinc finger protein CONSTANS
	1.8	Traes_7BS_0F8065DCB.2	MOB kinase activator 1
	1	Traes_3AL_1E04F9AA3.1	cellulose synthase A
	0.2	Traes_5BL_621EC49171.1	--
	1.5	Traes_6AS_3F9F02641.1	apyrase
	1.5	Traes_4DL_905A85957.3	--
	0	Traes_4AL_68FAFA3FA.1	--
	1	Traes_2DL_CAE4AEC4D.1	peroxidase
	1	Traes_4BL_5AF7ACF03.2	--
	1.5	Traes_4BL_B4A3BF346.1	mitochondrial ABC transporter ATM
	1	Traes_3DL_2B5E6DA86.1	cardiolipin synthase
	2	Traes_3DL_5F2B5474E.1	ethylene-insensitive protein 3
	1	Traes_4BS_6592C8BFB.1	interleukin-1 receptor-associated kinase 1
	1.5	Traes_5BL_72FA8AB31.1	RNA-binding motif protein, X-linked 2
	1.5	Traes_3DL_864BD44EB.1	--
	2.5	Traes_4BL_2CD045152.1	MFS transporter, SP family, solute carrier family 2 (myo-inositol transporter), member 13
	2	Traes_2BS_4D515766C.1	--
	1.5	Traes_3DL_B3BA983EC.2	ubiquitin C
	2.5	Traes_4AS_6C23CE2D6.1	nuclear cap-binding protein subunit 1
	0	Traes_1DS_A8D27A55B.2	protein transport protein SEC20
	0	Traes_2AS_6BF19AB61.1	beta-galactoside alpha-2,3-sialyltransferase (sialyltransferase 4A)
	2	Traes_4BS_EF4C8D5D3.2	interleukin-1 receptor-associated kinase 4
	0	Traes_2AS_E022ED09E.1	disease resistance protein RPM1
	1.5	Traes_5AS_F4290A5DD.1	--
	2	Traes_4AS_E01B18DB6.4	--
	1.5	Traes_4DL_CD9F2C6A5.1	mitochondrial ABC transporter ATM
	2.5	Traes_3DL_D80739435.1	pyrroline-5-carboxylate reductase
	2	Traes_7AL_D93FEFFA4.1	--
	0	Traes_2DL_EF5D7C7E4.1	cysteinyl-tRNA synthetase
	2	Traes_1BS_E0F21D7B0.2	casein kinase 1, delta
	0.5	Traes_4BL_165838228.1	solute carrier family 32 (vesicular inhibitory amino acid transporter)
	1.5	Traes_3AL_0AB33F72B.1	ethylene-insensitive protein 3
	0	Traes_5BL_974F53A4E.1	indolin-2-one monooxygenase
	0	Traes_4BL_F24448A6C.1	phosphoglucomutase
	1.2	Traes_4BS_35F8C45F6.1	protein HIRA/HIR1
	0.8	Traes_1DS_0E91E3E72.2	heparan-alpha-glucosaminide N-acetyltransferase
	0	Traes_4AL_2A5DEA0BB.1	--
	2.5	Traes_4DL_CFC191A06.1	MFS transporter, SP family, solute carrier family 2 (myo-inositol transporter), member 13
	2.5	Traes_2BL_A31B30F0C.1	interleukin-1 receptor-associated kinase 1
	2	Traes_4AS_9016EEA44.1	solute carrier family 32 (vesicular inhibitory amino acid transporter)
	1	Traes_6BL_C4853F943.1	alpha-mannosidase
	0.5	Traes_7AS_2D94ACEA3.2	ataxia telangiectasia mutated family protein
	1	Traes_6BS_E8C1B7713.1	--
	2	Traes_4AS_623928DB3.2	--
	0.5	Traes_5BL_A6C9022BD.1	--
	2	Traes_7AL_DFFCB625F.1	--
	0.5	Traes_1AS_41E7FE70A.1	E3 ubiquitin-protein ligase synoviolin
	1	Traes_2BL_07AD14DF5.2	cysteamine dioxygenase
	2	Traes_7BL_F27D01730.1	serine/threonine-protein kinase TNNI3K
	0.5	Traes_3DL_8DA1E6EE6.1	small subunit ribosomal protein S1
	1	Traes_6BS_1F8620694.1	--
	0.5	Traes_3DS_DE6997A0D.1	--
	1	Traes_4DL_E85C4F1A4.1	solute carrier family 25 (mitochondrial carnitine/acylcarnitine transporter), member 20/29
	1	Traes_7AS_B7BA40D9B.1	lipopolysaccharide-binding protein
	0	Traes_4BL_37FDD905B.1	phosphoglucomutase
	0.8	Traes_4BL_415F0F7C7.2	xylose isomerase
	2.5	Traes_6BL_E1793636C.1	MADS-box transcription factor, plant
	2	Traes_2BL_657544507.2	serine/threonine-protein kinase ULK/ATG1
	2	Traes_5BS_242B8923E.3	INO80 complex subunit B
	2	Traes_7BL_3A57104BA.1	--
	0	Traes_1BL_52343A948.1	--
	1	Traes_5BL_43BC70A681.2	--
	2.5	Traes_4BL_2DC69E686.2	DNA-directed RNA polymerase, mitochondrial
	2	Traes_1AL_CD4872CA5.2	myosin heavy chain
	2.5	Traes_6BS_0DD7912A4.1	--
	2.2	Traes_6AL_686E9F639.1	magnesium/proton exchanger
	2	Traes_1AL_F12A4B1F5.4	--
	1.5	Traes_4DL_F36410B89.2	replication factor C subunit 1
	2	Traes_3DL_2A3DB0BCA.2	--
	2	Traes_7BL_B2D9AA189.1
	0.5	Traes_7AS_253CD9243.1	retinol dehydrogenase 12
	0	Traes_3DS_F06D2F641.1	ribonuclease Z
	0	Traes_6AL_10669329F.1	26S proteasome regulatory subunit N7
	0.5	Traes_2AL_46A17F0C9.1	--
	1	Traes_1BL_471B5805D.2	myosin heavy chain
	2.5	Traes_6AL_10D9FAC80.2	--
	2	Traes_6DS_5FA2572C3.1	--
	2	Traes_5AL_9F207C3A8.1	formyltetrahydrofolate deformylase
	0.5	Traes_1AL_4E924201A.1	WRKY transcription factor 22
	1	Traes_5BL_FC55C864D.1	--
	1	Traes_1BL_794E99FF5.1	WRKY transcription factor 22
	1.5	Traes_6BS_E8E6C362B.1	--
	1.5	Traes_6DS_90923023B.1	--
	1.5	Traes_4AL_5AA1DFD55.1	retinol dehydrogenase 12
	2	Traes_4BS_ADA821068.3	structural maintenance of chromosome 1
	2	Traes_1BL_998F2411E.2	structure-specific endonuclease subunit SLX1
	1	Traes_4BS_8A5DAED26.2	--
	0.5	Traes_5BL_54CC7D2D6.1	2,4-dihydroxy-1,4-benzoxazin-3-one-glucoside dioxygenase
	2	Traes_5DL_A6EECBC04.1	--
	1	Traes_2BL_37BE86019.1	cytochrome P450, family 26, subfamily A
	1.5	Traes_2AL_44725A666.1	sn1-specific diacylglycerol lipase
	2	Traes_2DS_AC2665947.1	--
	1.5	Traes_4BS_35E7A5D8E.2	--
	0	Traes_6DS_7402E88F1.1	apyrase
	2	Traes_4BS_8C6ADCEDA.1	--
	0	Traes_6BL_D413BB851.2	--
	1	Traes_3DL_7D25C6081.1	--
	1.2	Traes_6AL_E308E6BC8.1	26S proteasome regulatory subunit N7
	0	Traes_5BL_FD0EDD217.1	cyclin C
	1	Traes_3AL_30294D0A5.1	glycerol-3-phosphate dehydrogenase (NAD+)
	2	Traes_5BS_A399E8CB4.1	--
	0.5	Traes_4BL_CC7FF6AC8.1	signal peptide peptidase-like 2B
	0.5	Traes_5AL_0CFF03836.1	zinc finger protein CONSTANS
	2	Traes_4AL_2ADD2BE44.1	ribonucleases P/MRP protein subunit RPP25
	2.5	Traes_5DS_CAD6C9339.2	interleukin-1 receptor-associated kinase 1
	1	Traes_1DL_619CCC605.1	myosin heavy chain
	1	Traes_6BS_4F47E0700.1	chlorophyllase
	2	Traes_7AS_4AA537AF2.1	--
	0	Traes_3DS_2D80CF4F8.1	translation initiation factor 4E
	2	Traes_5BL_5BD35BD85.2	integrator complex subunit 11
	1	Traes_1BS_DC30245241.2	6-phosphofructokinase 1
	0	Traes_2BS_778FD15DC.1	beta-galactoside alpha-2,3-sialyltransferase (sialyltransferase 4A)
	1.5	Traes_3AL_BD0D7C1BE.2	--
	2.5	Traes_2DL_9E678AFFB.1	homeobox-leucine zipper protein
	2	Traes_5DL_67A38E9B7.1	--
novel_mir_929	2	TRAES3BF099900100CFD_t1	--
	1.8	Traes_6BL_E14604962.3	polyadenylate-binding protein 2
	2	TRAES3BF099900090CFD_t1	--
novel_mir_947	2.5	Traes_7DL_A4DD864CC.2	interleukin-1 receptor-associated kinase 4
	2	Traes_7DS_54CDC2F4B.1	--
	2	Traes_7BS_BFDFF014C.1	--
	2	Traes_7AS_9C66A3714.1	--
	1.5	Traes_4BL_BE2FDB2CD.1	alpha-L-fucosidase 2
	0.5	Traes_2BL_E151883B1.1	ent-kaurene oxidase
	2	Traes_3DL_C84D7F1B1.1	5'-AMP-activated protein kinase, catalytic alpha subunit
	1.5	Traes_4DL_3BEA40EE1.1	--
